# Supplementary material for: Concise synthesis of ketoallyl sulfones through an iron-catalyzed sequential four-component assembly
Source: Royal Society of Chemistry journal article supplement (doi:10.1039/c7gc03719h), 2018-01-01

## Supporting Information

### Concise Synthesis of Ketoallyl Sulfones through an Iron-Catalyzed Sequential Four-Component Assembly

Fuhong Xiao\*, Chao Liu, Dahan Wang, Huawen Huang, Guo-Jun Deng\*

<sup>a</sup> Key Laboratory of Environmentally Friendly Chemistry and Application of Ministry of Education, College of Chemistry, Xiangtan University, Xiangtan 411105, China. Fax: (+86)0731-58292251; Tel: (+86)0731-58298280; E-mail: [fhxiao@xtu.edu.cn](mailto:fhxiao@xtu.edu.cn); [gjdeng@xtu.edu.cn](mailto:gjdeng@xtu.edu.cn)

#### Table of Contents

|                                                                                                         |              |
|---------------------------------------------------------------------------------------------------------|--------------|
| <b>1. General information</b>                                                                           | <b>2</b>     |
| <b>2. General procedure for <math>\beta</math>-acyl allylic sulfones synthesis</b>                      | <b>2</b>     |
| <b>3. Characterization data of products</b>                                                             | <b>2-23</b>  |
| <b>4. Copies of <math>^1\text{H}</math> and <math>^{13}\text{C}</math> NMR spectra for all products</b> | <b>24-71</b> |

## General information

All reactions were carried out under an atmosphere of air. Column chromatography was performed using silica gel 48-75  $\mu\text{m}$ .  $^1\text{H}$  NMR and  $^{13}\text{C}$  NMR spectra were recorded on Bruker-AV (400 and 100 MHz, respectively) instrument internally referenced to tetramethylsilane (TMS) or chloroform signals. Mass spectra were measured on Agilent 5975 GC-MS instrument (EI). High-resolution mass spectra were recorded at the Institute of Chemistry, Chinese Academy of Sciences. The structures of known compounds were further corroborated by comparing their  $^1\text{H}$  NMR,  $^{13}\text{C}$  NMR data and MS data with those of literature. Most reagents were obtained from commercial suppliers and used without further purification.

## General procedure (3aa)

A 10 mL oven-dried reaction vessel was charged with  $\text{K}_2\text{S}_2\text{O}_8$  (189.2 mg, 7 mmol), sodium dodecyl (5.8 mg, 0.02 mmol),  $\text{FeCl}_3$  (4 mg, 0.02 mmol), acetophenone (**1a**, 23.4  $\mu\text{L}$ , 0.2 mmol), sulfatesodium benzenesulfinate (**2a**, 82 mg, 0.5 mmol), and DMA (1.2 mL) under air. The sealed reaction vessel was stirred at 110  $^\circ\text{C}$  for 14 h. After cooling to room temperature, the reaction was diluted with ethyl acetate (5 mL) and washed with saturated sodium chloride solution. The organic layer was separated, and the aqueous layer was extracted with ethyl acetate for three times. The combined organic layer was dried over magnesium sulfate and the volatiles were removed under reduced pressure. The residue was purified by column chromatography on silica gel (petroleum ether/ethyl acetate = 10:1) to yield the desired product **3aa** as white solid (49.8 mg, 87% yield), mp = 99-101  $^\circ\text{C}$ .

## phenyl-2-((phenylsulfonyl)methyl)prop-2-en-1-one (3aa)

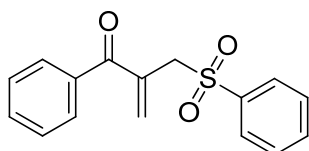

$^1\text{H}$  NMR (400 MHz,  $\text{CDCl}_3$ )  $\delta$  7.93-7.91 (m, 2H), 7.67-7.50 (m, 6H), 7.43 (t,  $J$  = 7.6 Hz, 2H), 6.29 (s, 1H), 6.05 (s, 1H), 4.37 (s, 2H).  $^{13}\text{C}$  NMR (100 MHz,  $\text{CDCl}_3$ )  $\delta$  194.7, 138.8, 136.2, 135.7, 134.1, 133.9, 132.6, 129.6, 129.2, 128.36, 128.3, 57.7. HRMS calcd. for:  $\text{C}_{16}\text{H}_{14}\text{O}_3\text{SNa}^+$  ( $\text{M}+\text{Na}$ ) $^+$  309.05559, found 309.05591

## 1-phenyl-2-(tosylmethyl)prop-2-en-1-one (3ab)

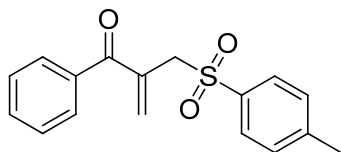

The reaction was conducted with sodium acetophenone (**1a**, 23.4  $\mu\text{L}$ , 0.2 mmol), and 4-methylbenzenesulfinate

(**2b**, 89 mg, 0.5 mmol). The residue was purified by column chromatography on silica gel (petroleum ether/ethyl acetate = 10:1) to yield the desired product **3ab** as yellow oil. (43.2 mg, 72% yield).

$^1\text{H}$  NMR (400 MHz,  $\text{CDCl}_3$ )  $\delta$  7.78 (d,  $J$  = 8.2 Hz, 2H), 7.68-7.65 (m, 2H), 7.55 (t,  $J$  = 7.4 Hz, 1H), 7.43 (t,  $J$  = 7.8 Hz, 2H), 7.30 (d,  $J$  = 8.3 Hz, 2H), 6.25 (s, 1H), 6.02 (s, 1H), 4.35 (s, 2H), 2.39 (s, 3H).  $^{13}\text{C}$  NMR (100 MHz,  $\text{CDCl}_3$ )  $\delta$  194.7, 144.9, 136.1, 135.8, 135.7, 133.9, 132.6, 129.8, 129.6, 128.3, 128.2, 57.7, 21.6. HRMS calcd. for:  $\text{C}_{17}\text{H}_{17}\text{O}_3\text{S}^+$   $[\text{M}+\text{H}]^+$  301.08929, found 301.08908.

### 2-(((4-isopropylphenyl)sulfonyl)methyl)-1-phenylprop-2-en-1-one (**3ac**)

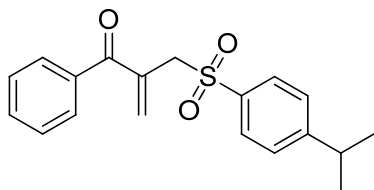

The reaction was conducted with acetophenone (**1a**, 23.4  $\mu\text{L}$ , 0.2 mmol) and sodium 4-isopropylbenzenesulfinate (**2c**, 103.1 mg, 0.5 mmol). The residue was purified by column chromatography on silica gel (petroleum ether/ethyl acetate = 10:1) to yield the desired product **3ac** as white solid. (32.8 mg, 50% yield), mp = 92-95  $^{\circ}\text{C}$

$^1\text{H}$  NMR (400 MHz,  $\text{CDCl}_3$ )  $\delta$  7.81 (d,  $J$  = 8.4 Hz, 2H), 7.65-7.63 (m, 2H), 7.54 (t,  $J$  = 7.4 Hz, 1H), 7.42 (t,  $J$  = 7.7 Hz, 2H), 7.33 (d,  $J$  = 8.3 Hz, 2H), 6.28 (s, 1H), 6.02 (s, 1H), 4.36 (s, 2H), 2.96-2.89 (m, 1H), 1.19 (d,  $J$  = 6.9 Hz, 6H).  $^{13}\text{C}$  NMR (100 MHz,  $\text{CDCl}_3$ )  $\delta$  194.6, 155.6, 136.1, 136.0, 135.8, 133.7, 132.6, 129.6, 128.5, 128.2, 127.3, 57.7, 34.2, 23.5. HRMS calcd. for:  $\text{C}_{19}\text{H}_{21}\text{O}_3\text{S}^+$   $[\text{M}+\text{H}]^+$  329.12059, found 329.12064.

### 2-(((4-(tert-butyl)phenyl)sulfonyl)methyl)-1-phenylprop-2-en-1-one (**3ad**)

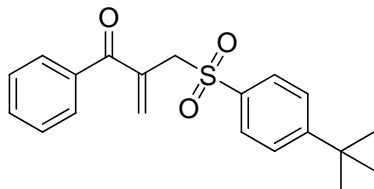

The reaction was conducted with acetophenone (**1a**, 23.4  $\mu\text{L}$ , 0.2 mmol) and sodium 4-(tert-butyl)benzenesulfinate (**2d**, 110.0 mg, 0.5 mmol). The residue was purified by column chromatography on silica gel (petroleum ether/ethyl acetate = 10:1) to yield the desired product **3ad** as white solid. (37.6 mg, 55% yield), mp = 141-143  $^{\circ}\text{C}$ .

$^1\text{H}$  NMR (400 MHz,  $\text{CDCl}_3$ )  $\delta$  7.81 (d,  $J$  = 8.5 Hz, 2H), 7.65-7.63 (m, 2H), 7.54 (t,  $J$  = 7.4 Hz, 1H), 7.49 (d,  $J$  =

8.5 Hz, 2H), 7.41 (t,  $J = 7.7$  Hz, 2H), 6.28 (s, 1H), 6.01 (s, 1H), 4.37 (s, 2H), 1.27 (s, 9H).  $^{13}\text{C}$  NMR (100 MHz,  $\text{CDCl}_3$ )  $\delta$  194.6, 157.9, 136.0, 135.7, 135.6, 133.7, 129.7, 128.3, 128.2, 126.2, 57.7, 35.2, 30.9. HRMS calcd. for:  $\text{C}_{20}\text{H}_{23}\text{O}_3\text{S}^+ [\text{M}+\text{H}]^+$  343.13624, found 343.13632.

### 2-(((4-methoxyphenyl)sulfonyl)methyl)-1-phenylprop-2-en-1-one (3ae)

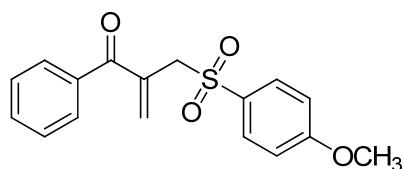

The reaction was conducted with acetophenone (**1a**, 23.4  $\mu\text{L}$ , 0.2 mmol) and sodium 4-methoxybenzenesulfinate (**2e**, 97.0 mg, 0.5 mmol). The residue was purified by column chromatography on silica gel (petroleum ether/ethyl acetate = 6:1) to yield the desired product **3ae** as yellow oil. (35.1 mg, 47% yield).

$^1\text{H}$  NMR (400 MHz,  $\text{CDCl}_3$ )  $\delta$  7.82 (d,  $J = 8.9$  Hz, 2H), 7.68-7.66 (m, 2H), 7.55 (t,  $J = 7.4$  Hz, 1H), 7.43 (t,  $J = 7.6$  Hz, 2H), 6.95 (d,  $J = 8.9$  Hz, 2H), 6.27 (s, 1H), 6.03 (s, 1H), 4.34 (s, 2H), 3.83 (s, 3H).  $^{13}\text{C}$  NMR (100 MHz,  $\text{CDCl}_3$ )  $\delta$  194.8, 163.9, 136.2, 136.0, 133.9, 132.6, 130.5, 130.4, 129.6, 128.3, 114.4, 58.0, 55.6. HRMS calcd. for:  $\text{C}_{17}\text{H}_{17}\text{O}_4\text{S} [\text{M}+\text{H}]^+$  317.08421, found 317.08420.

### 2-(((4-fluorophenyl)sulfonyl)methyl)-1-phenylprop-2-en-1-one (3af)

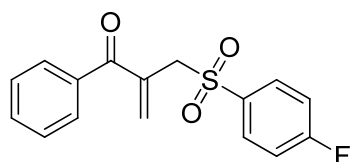

The reaction was conducted with acetophenone (**1a**, 23.4  $\mu\text{L}$ , 0.2 mmol) and sodium 4-fluorobenzenesulfinate (**2f**, 91.0 mg, 0.5 mmol). The residue was purified by column chromatography on silica gel (petroleum ether/ethyl acetate = 10:1) to yield the desired product **3af** as yellow oil. (44.5 mg, 73% yield).

$^1\text{H}$  NMR (400 MHz,  $\text{CDCl}_3$ )  $\delta$  7.94-7.91 (m, 2H), 7.67-7.75 (m, 2H), 7.57 (t,  $J = 7.4$  Hz, 1H), 7.44 (t,  $J = 7.6$  Hz, 2H), 7.18 (t,  $J = 8.6$  Hz, 2H), 6.33 (s, 1H), 6.08 (s, 1H), 4.37 (s, 2H).  $^{13}\text{C}$  NMR (100 MHz,  $\text{CDCl}_3$ )  $\delta$  194.6, 165.9 (d,  $J = 255.31$  Hz), 136.0, 135.5, 134.9 (d,  $J = 3.10$  Hz), 134.4, 132.7, 131.3 (d,  $J = 9.58$  Hz), 129.5, 128.3, 116.5 (d,  $J = 22.53$  Hz), 57.84. HRMS calcd. for:  $\text{C}_{16}\text{H}_{13}\text{FO}_3\text{SNa}^+ [\text{M}+\text{Na}]^+$  327.04616, found 327.04535.

### 2-(((4-chlorophenyl)sulfonyl)methyl)-1-phenylprop-2-en-1-one (3ag)

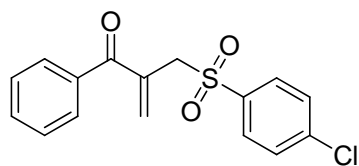

The reaction was conducted with acetophenone (**1a**, 23.4  $\mu$ L, 0.2 mmol) and sodium 4-chlorobenzenesulfinate (**2g**, 91.0 mg, 0.5 mmol). The residue was purified by column chromatography on silica gel (petroleum ether/ethyl acetate = 10:1) to yield the desired product **3ag** as yellow oil. (60.9 mg, 95% yield).

$^1\text{H}$  NMR (400 MHz,  $\text{CDCl}_3$ )  $\delta$  7.85-7.83 (m, 2H), 7.67-7.65 (m, 2H), 7.56-7.55 (m, 1H), 7.50-7.42 (m, 4H), 6.30 (s, 1H), 6.06 (s, 1H), 4.37 (s, 2H).  $^{13}\text{C}$  NMR (100 MHz,  $\text{CDCl}_3$ )  $\delta$  194.5, 140.6, 137.2, 136.0, 135.3, 134.3, 132.7, 129.8, 129.48, 129.45, 128.3, 57.73. HRMS calcd. for:  $\text{C}_{16}\text{H}_{13}\text{ClO}_3\text{SNa}^+$   $[\text{M}+\text{Na}]^+$  343.01661, found 343.01630.32.

### 2-(((4-bromophenyl)sulfonyl)methyl)-1-phenylprop-2-en-1-one (3ah)

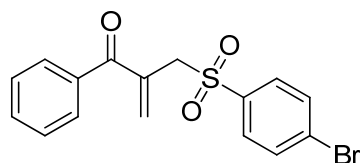

The reaction was conducted with acetophenone (**1a**, 23.4  $\mu$ L, 0.2 mmol) and sodium 4-bromobenzenesulfinate (**2h**, 139.6 mg, 0.5 mmol). The residue was purified by column chromatography on silica gel (petroleum ether/ethyl acetate = 10:1) to yield the desired product **3ah** as yellow oil. (70.8 mg, 95% yield).

$^1\text{H}$  NMR (400 MHz,  $\text{CDCl}_3$ )  $\delta$  7.78-7.75 (m, 2H), 7.67-7.64 (m, 4H), 7.58-7.54 (m, 1H), 7.46-7.42 (m, 2H), 6.29 (s, 1H), 6.06 (s, 1H), 4.37 (s, 2H).  $^{13}\text{C}$  NMR (100 MHz,  $\text{CDCl}_3$ )  $\delta$  194.5, 137.8, 135.95, 135.3, 134.3, 132.7, 132.4, 129.8, 129.5, 129.3, 128.3, 57.72. HRMS calcd. for:  $\text{C}_{16}\text{H}_{13}\text{BrO}_3\text{SNa}^+$   $[\text{M}+\text{Na}]^+$  386.96610, found 386.96637.

### 1-phenyl-2-(((4-(trifluoromethyl)phenyl)sulfonyl)methyl)prop-2-en-1-one (3ai)

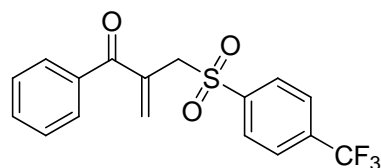

The reaction was conducted with acetophenone (**1a**, 23.4  $\mu$ L, 0.2 mmol) and sodium 4-(trifluoromethyl)benzenesulfinate (**2i**, 116.0 mg, 0.5 mmol). The residue was purified by column

chromatography on silica gel (petroleum ether/ethyl acetate = 8:1) to yield the desired product **3ai** as white solid. (55.0 mg, 78% yield), mp = 99–102 °C.

$^1\text{H}$  NMR (400 MHz,  $\text{CDCl}_3$ )  $\delta$  8.05 (d,  $J$  = 8.2 Hz, 2H), 7.79 (d,  $J$  = 8.3 Hz, 2H), 7.66–7.64 (m, 2H), 7.57 (t,  $J$  = 7.5 Hz, 1H), 7.44 (t,  $J$  = 7.7 Hz, 2H), 6.35 (s, 1H), 6.10 (s, 1H), 4.40 (s, 2H).  $^{13}\text{C}$  NMR (100 MHz,  $\text{CDCl}_3$ )  $\delta$  194.5, 142.4, 135.9, 135.1, 134.5, 132.9, 129.5, 129.1, 128.4, 126.3 (q,  $J$  = 3.64 Hz), 57.76. HRMS calcd. for:  $\text{C}_{17}\text{H}_{13}\text{F}_3\text{O}_3\text{SNa}^+ [\text{M}+\text{Na}]^+$  377.04297, found 377.04233.

### 2-((naphthalen-1-ylsulfonyl)methyl)-1-phenylprop-2-en-1-one (3aj)

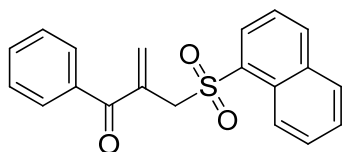

The reaction was conducted with acetophenone (**1a**, 23.4  $\mu\text{L}$ , 0.2 mmol) and sodium naphthalene-1-sulfinate (**2j**, 107.0 mg, 0.5 mmol). The residue was purified by column chromatography on silica gel (petroleum ether/ethyl acetate = 10:1) to yield the desired product **3aj** as white solid. (35.6 mg, 53% yield), mp = 113–116 °C.

$^1\text{H}$  NMR (400 MHz,  $\text{CDCl}_3$ )  $\delta$  8.81 (d,  $J$  = 8.7 Hz, 1H), 8.30–8.27 (m, 1H), 8.10 (d,  $J$  = 8.2 Hz, 1H), 7.96 (d,  $J$  = 8.2 Hz, 1H), 7.79–7.75 (m, 1H), 7.68–7.62 (m, 3H), 7.57–7.52 (m, 2H), 7.43 (t,  $J$  = 7.6 Hz, 2H), 6.18 (s, 1H), 5.99 (s, 1H), 4.55 (d,  $J$  = 0.4 Hz, 2H).  $^{13}\text{C}$  NMR (100 MHz,  $\text{CDCl}_3$ )  $\delta$  194.8, 136.2, 135.6, 135.5, 134.1, 133.9, 133.8, 132.6, 131.0, 129.7, 129.2, 129.0, 128.9, 128.3, 127.2, 124.1, 57.48. HRMS calcd. for:  $\text{C}_{20}\text{H}_{16}\text{O}_3\text{SNa}^+ [\text{M}+\text{Na}]^+$  359.07124, found 359.07190.

### 2-((naphthalen-2-ylsulfonyl)methyl)-1-phenylprop-2-en-1-one (3ak)

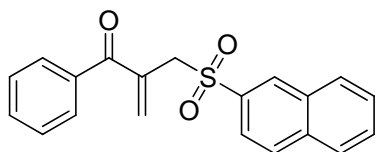

The reaction was conducted with acetophenone (**1a**, 23.4  $\mu\text{L}$ , 0.2 mmol) and sodium naphthalene-2-sulfinate (**2k**, 107.0 mg, 0.5 mmol). The residue was purified by column chromatography on silica gel (petroleum ether/ethyl acetate = 10:1) to yield the desired product **3ak** as yellow solid. (38.3 mg, 57% yield), mp = 117–120 °C.

$^1\text{H}$  NMR (400 MHz,  $\text{CDCl}_3$ )  $\delta$  8.46 (s, 1H), 7.99–7.87 (m, 4H), 7.67–7.58 (m, 4H), 7.51 (t,  $J$  = 7.4 Hz, 1H), 7.37 (t,  $J$  = 7.7 Hz, 2H), 6.28 (s, 1H), 6.03 (s, 1H), 4.45 (s, 2H).  $^{13}\text{C}$  NMR (100 MHz,  $\text{CDCl}_3$ )  $\delta$  194.7, 136.1, 135.7, 135.3, 133.8, 132.6, 132.0, 130.3, 129.6, 129.6, 129.3, 128.2, 128.0, 127.7, 122.8, 57.86. HRMS calcd. for:

$C_{20}H_{17}O_3S^+$   $[M+H]^+$  337.08929, found 337.08911.

### 1-phenyl-2-((propylsulfonyl)methyl)prop-2-en-1-one (3al)

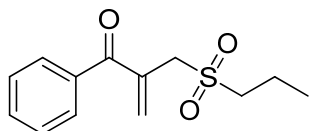

The reaction was conducted with acetophenone (**1a**, 23.4  $\mu$ L, 0.2 mmol) and sodium propane-1-sulfinate (**2l**, 65.0 mg, 0.5 mmol). The residue was purified by column chromatography on silica gel (petroleum ether/ethyl acetate = 10:1) to yield the desired product **3ai** as yellow oil. (12.1 mg, 24% yield).

$^1H$  NMR (400 MHz,  $CDCl_3$ )  $\delta$  7.80-7.78 (m, 2H), 7.60 (t,  $J$  = 7.4 Hz, 1H), 7.48 (t,  $J$  = 7.6 Hz, 2H), 6.43 (s, 1H), 6.13 (s, 1H), 4.20 (s, 2H), 3.01-2.98 (m, 2H), 1.96-1.90 (m, 2H), 1.08 (t,  $J$  = 7.4 Hz, 3H).  $^{13}C$  NMR (100 MHz,  $CDCl_3$ )  $\delta$  195.7, 136.3, 135.7, 134.6, 132.9, 129.7, 128.5, 55.2, 54.9, 15.8, 13.1. HRMS calcd. for:  $C_{13}H_{17}O_3S^+$   $[M+H]^+$  253.08929, found 253.08966.

### 2-((cyclopropylsulfonyl)methyl)-1-phenylprop-2-en-1-one (3am)

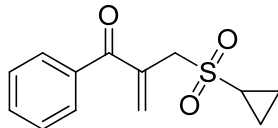

The reaction was conducted with acetophenone (**1a**, 23.4  $\mu$ L, 0.2 mmol) and sodium cyclopropanesulfinate (**2m**, 65.0 mg, 0.5 mmol). The residue was purified by column chromatography on silica gel (petroleum ether/ethyl acetate = 10:1) to yield the desired product **3am** as white solid (15.5 mg, 31% yield). mp = 131–134  $^{\circ}C$ .

$^1H$  NMR (400 MHz,  $CDCl_3$ )  $\delta$  7.81-7.79 (m, 2H), 7.61-7.57 (m, 1H), 7.50-7.46 (m, 2H), 6.40 (s, 1H), 6.12 (s, 1H), 4.30 (m, 2H), 2.46-2.40 (m, 1H), 1.27-1.23 (m, 2H), 1.03-0.98 (m, 2H).  $^{13}C$  NMR (100 MHz,  $CDCl_3$ )  $\delta$  195.4, 136.4, 135.9, 134.3, 132.8, 129.7, 128.5, 55.8, 30.2, 5.2. HRMS calcd. for:  $C_{13}H_{15}O_3S^+$   $[M+H]^+$  251.07364, found 251.07408.

### 2-((phenylsulfonyl)methyl)-1-(p-tolyl)prop-2-en-1-one (3ba)

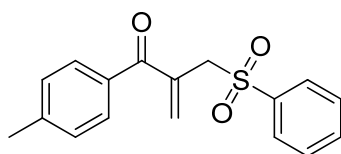

The reaction was conducted with 1-(p-tolyl)ethanone (**1b**, 37  $\mu$ L, 0.2 mmol) and sodium benzenesulfinate (**2a**,

82 mg, 0.5 mmol). The residue was purified by column chromatography on silica gel (petroleum ether/ethyl acetate = 10:1) to yield the desired product **3ba** as white solid (51.9 mg, 87% yield), mp = 133-135 °C.

<sup>1</sup>H NMR (400 MHz, CDCl<sub>3</sub>, ppm) δ 7.91-7.89 (m, 2H), 7.59-7.57 (m, 3H), 7.52-7.48 (m, 2H), 7.22 (d, *J* = 8.0 Hz, 2H), 6.23 (s, 1H), 6.01 (s, 1H), 4.36 (s, 2H), 2.41 (s, 3H). <sup>13</sup>C NMR (100 MHz, CDCl<sub>3</sub>, ppm) δ 194.4, 143.7, 138.9, 135.8, 134.0, 133.6, 133.5, 123.0, 129.3, 129.1, 128.5, 58.0, 21.7. HRMS calcd. for: C<sub>17</sub>H<sub>17</sub>O<sub>3</sub>S<sup>+</sup> [M+H]<sup>+</sup> 301.08929, found 301.08929.

### 1-(4-(sec-butyl)phenyl)-2-((phenylsulfonyl)methyl)prop-2-en-1-one(3ca)

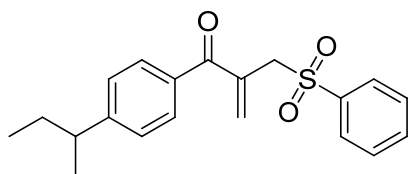

The reaction was conducted with 1-(4-(sec-butyl)phenyl)ethanone (**1c**, 37 μL, 0.2 mmol) and sodium benzenesulfinate (**2a**, 82 mg, 0.5 mmol). The residue was purified by column chromatography on silica gel (petroleum ether/ethyl acetate = 10:1) to yield the desired product **3ca** as white solid (55.1 mg, 80% yield), mp = 91-93 °C.

<sup>1</sup>H NMR (400 MHz, CDCl<sub>3</sub>) δ 7.92-7.89 (m, 2H), 7.61-7.57 (m, 3H), 7.52 – 7.48 (m, 2H), 7.20 (d, *J* = 8.2 Hz, 2H), 6.22 (s, 1H), 6.02 (s, 1H), 4.37 (d, *J* = 0.5 Hz, 2H), 2.53 (d, *J* = 7.2 Hz, 2H), 1.89 (dt, *J* = 13.5, 6.8 Hz, 1H), 0.91 (d, *J* = 6.6 Hz, 6H). <sup>13</sup>C NMR (100 MHz, CDCl<sub>3</sub>) δ 194.3, 147.2, 138.7, 135.6, 133.8, 133.6, 133.4, 129.7, 129.1, 129.0, 128.3, 57.8, 45.3, 30.0, 22.3. HRMS calcd. for: C<sub>20</sub>H<sub>23</sub>O<sub>3</sub>S<sup>+</sup> [M+H]<sup>+</sup> 343.13624, found 343.13625

### 1-(4-methoxyphenyl)-2-((phenylsulfonyl)methyl)prop-2-en-1-one(3da)

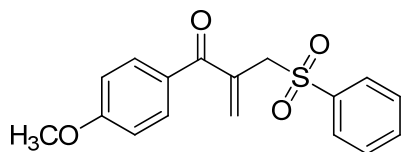

The reaction was conducted with 1-(4-methoxyphenyl)ethanone (**1d**, 31 mg, 0.2 mmol) and sodium benzenesulfinate (**2a**, 82 mg, 0.5 mmol). The residue was purified by column chromatography on silica gel (petroleum ether/ethyl acetate = 8:1) to yield the desired product **3da** as white solid (50.6 mg, 81% yield), mp = 93-95 °C.

<sup>1</sup>H NMR (400 MHz, CDCl<sub>3</sub>) δ 7.89 (d, *J* = 7.4 Hz, 2H), 7.72 (d, *J* = 8.7 Hz, 2H), 7.59 (t, *J* = 7.4 Hz, 1H), 7.50 (t, *J* = 7.7 Hz, 2H), 6.16 (s, 1H), 5.96 (s, 1H), 4.36 (s, 2H), 3.87 (d, *J* = 0.6 Hz, 3H). <sup>13</sup>C NMR (100 MHz, CDCl<sub>3</sub>) δ



193.2, 163.4, 138.8, 135.6, 133.8, 132.3, 132.1, 129.1, 128.5, 128.2, 113.5, 58.2, 55.4. HRMS calcd. for:  $C_{17}H_{17}O_4S^+$   $[M+H]^+$  317.08421, found 317.08405.

**1-([1,1'-biphenyl]-4-yl)-2-((phenylsulfonyl)methyl)prop-2-en-1-one(3ea)**

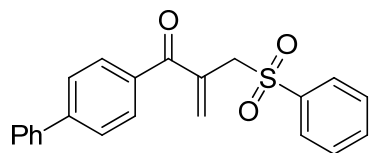

The reaction was conducted with 1-([1,1'-biphenyl]-4-yl)ethanone (**1e**, 39.2 mg,, 0.2 mmol) and sodium benzenesulfinate (**2a**, 82 mg, 0.5 mmol). The residue was purified by column chromatography on silica gel (petroleum ether/ethyl acetate = 10:1) to yield the desired product **3ea** as white solid (55.4 mg, 76% yield), mp = 117–120 °C.

$^1H$  NMR (400 MHz,  $CDCl_3$ )  $\delta$  7.92 (dd,  $J$  = 5.2, 3.3 Hz, 2H), 7.80-7.71 (m, 2H), 7.67-7.57 (m, 5H), 7.54-7.38 (m, 5H), 6.27 (s, 1H), 6.08 (s, 1H), 4.39 (s, 2H).  $^{13}C$  NMR (100 MHz,  $CDCl_3$ )  $\delta$  194.2, 145.4, 139.7, 138.8, 135.7, 134.7, 133.9, 133.6, 130.2, 129.2, 128.9, 128.3, 128.2, 127.2, 126.9, 57.8. HRMS calcd. for:  $C_{22}H_{18}O_3S^+$   $[M+H]^+$  363.10494, found 363.10483.

**1-(4-nitrophenyl)-2-((phenylsulfonyl)methyl)prop-2-en-1-one(3fa)**

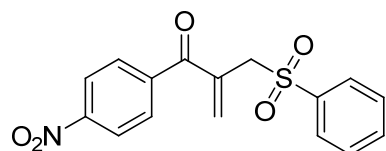

The reaction was conducted with 1-(4-nitrophenyl)ethanone (**1f**, 33 mg, 0.2 mmol) and sodium benzenesulfinate (**2a**, 82 mg, 0.5 mmol). The residue was purified by column chromatography on silica gel (petroleum ether/ethyl acetate = 6:1) to yield the desired product **3fa** as Yellow solid (36.1 mg, 54% yield), mp = 172-175 °C.

$^1H$  NMR (400 MHz,  $CDCl_3$ )  $\delta$  8.33-8.27 (m, 2H), 7.93 (d,  $J$  = 8.0 Hz, 2H), 7.86-7.80 (m, 2H), 7.66 (dd,  $J$  = 11.5, 4.3 Hz, 1H), 7.57 (t,  $J$  = 7.7 Hz, 2H), 6.38 (s, 1H), 6.02 (s, 1H), 4.37 (s, 2H).  $^{13}C$  NMR (100 MHz,  $CDCl_3$ )  $\delta$  193.2, 150.0, 141.5, 138.8, 135.5, 135.0, 134.1, 130.4, 129.3, 128.2, 123.5, 57.4. HRMS calcd. for:  $C_{16}H_{13}NO_5SNa^+$   $[M+Na]^+$  354.04066, found 354.04080.

#### 4-(2-((phenylsulfonyl)methyl)acryloyl)benzonitrile(**3ga**)

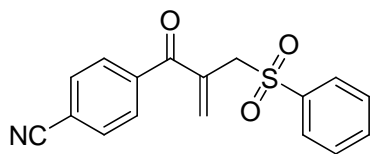

The reaction was conducted with 4-acetylbenzonitrile (**1g**, 33 mg, 0.2 mmol) and sodium benzenesulfinate (**2a**, 82 mg, 0.5 mmol). The residue was purified by column chromatography on silica gel (petroleum ether/ethyl acetate = 6:1) to yield the desired product **3ga** as Yellow solid (36.1 mg, 54% yield), mp = 156-159 °C.

$^1\text{H}$  NMR (400 MHz,  $\text{CDCl}_3$ )  $\delta$  7.92 (d,  $J$  = 8.3 Hz, 2H), 7.80-7.73 (m, 4H), 7.68-7.63 (m, 1H), 7.56 (t,  $J$  = 7.8 Hz, 2H), 6.34 (s, 1H), 6.00 (s, 1H), 4.36 (s, 2H).  $^{13}\text{C}$  NMR (100 MHz,  $\text{CDCl}_3$ )  $\delta$  193.3, 139.8, 138.8, 135.4, 134.7, 134.1, 132.1, 129.9, 129.3, 128.2, 117.8, 115.9, 57.5. HRMS calcd. for:  $\text{C}_{17}\text{H}_{13}\text{NO}_3\text{SNa}^+$   $[\text{M}+\text{Na}]^+$  334.05084, found 334.05081.

#### 1-(4-fluorophenyl)-2-((phenylsulfonyl)methyl)prop-2-en-1-one(**3ha**)

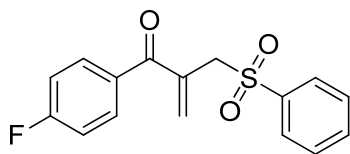

The reaction was conducted with 1-(4-fluorophenyl)ethanone (**1h**, 24  $\mu\text{L}$ , 0.2 mmol) and sodium benzenesulfinate (**2a**, 82 mg, 0.5 mmol). The residue was purified by column chromatography on silica gel (petroleum ether/ethyl acetate = 10:1) to yield the desired product **3ha** as White solid (50 mg, 82% yield), mp = 108-111 °C.

$^1\text{H}$  NMR (400 MHz,  $\text{CDCl}_3$ )  $\delta$  7.95-7.88 (m, 2H), 7.78-7.69 (m, 2H), 7.65-7.58 (m, 1H), 7.56-7.49 (m, 2H), 7.12 (dd,  $J$  = 9.5, 7.8 Hz, 2H), 6.24 (s, 1H), 5.99 (s, 1H), 4.36 (d,  $J$  = 0.7 Hz, 2H).  $^{13}\text{C}$  NMR (100 MHz,  $\text{CDCl}_3$ )  $\delta$  193.2, 165.4 (d,  $J$  = 253.09 Hz), 138.7, 135.5, 133.9, 133.4, 132.24365 (d,  $J$  = 9.13 Hz), 132.2436, 129.2, 128.2, 115.5 (d,  $J$  = 21.81 Hz), 57.92. HRMS calcd. for:  $\text{C}_{16}\text{H}_{14}\text{FO}_3\text{S}^+$   $[\text{M}+\text{H}]^+$  305.06422, found 305.06445.

#### 1-(4-chlorophenyl)-2-((phenylsulfonyl)methyl)prop-2-en-1-one (**3ia**)

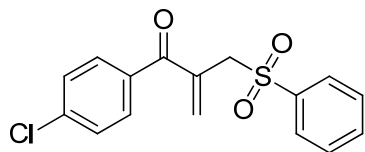

The reaction was conducted with 1-(4-chlorophenyl)ethanone (**1i**, 26  $\mu\text{L}$ , 0.2 mmol) and sodium benzenesulfinate (**2a**, 82 mg, 0.5 mmol). The residue was purified by column chromatography on silica gel

(petroleum ether/ethyl acetate = 10:1) to yield the desired product **3ia** as White solid (44.0 mg, 69% yield), mp = 124-127 °C.

$^1\text{H}$  NMR (400 MHz,  $\text{CDCl}_3$ )  $\delta$  7.92-7.89 (m, 2H), 7.66-7.61 (m, 3H), 7.53 (t,  $J$  = 7.6 Hz, 2H), 7.43-7.41 (m, 2H), 6.28 (s, 1H), 6.00 (s, 1H), 4.35 (s, 2H).  $^{13}\text{C}$  NMR (100 MHz,  $\text{CDCl}_3$ )  $\delta$  193.5, 139.2, 138.8, 135.5, 134.4, 134.0, 133.8, 131.0, 129.2, 128.7, 128.3, 57.8. HRMS calcd. for:  $\text{C}_{16}\text{H}_{14}\text{ClO}_3\text{S}^+$   $[\text{M}+\text{H}]^+$  321.03467, found 321.03497.

### 1-(4-bromophenyl)-2-((phenylsulfonyl)methyl)prop-2-en-1-one (**3ja**)

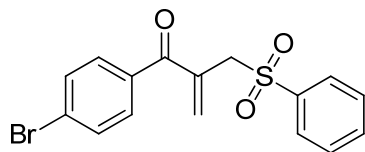

The reaction was conducted with 1-(4-bromophenyl)ethanone (**1j**, 39.8 mg, 0.2 mmol) and sodium benzenesulfinate (**2a**, 82 mg, 0.5 mmol). The residue was purified by column chromatography on silica gel (petroleum ether/ethyl acetate = 10:1) to yield the desired product **3ja** as White solid (56.9 mg, 78% yield), mp = 130 -132 °C.

$^1\text{H}$  NMR (400 MHz,  $\text{CDCl}_3$ )  $\delta$  7.91 (d,  $J$  = 7.7 Hz, 2H), 7.64-7.51 (m, 7H), 6.28 (s, 1H), 6.00 (s, 1H), 4.35 (s, 2H).  $^{13}\text{C}$  NMR (100 MHz,  $\text{CDCl}_3$ )  $\delta$  193.7, 138.83, 138.79, 135.51, 135.48, 134.8, 134.02, 134.00, 133.9, 133.8, 131.7, 131.1, 129.3, 128.3, 127.8, 77.3, 77.0, 76.6, 57.8. HRMS calcd. for:  $\text{C}_{16}\text{H}_{14}\text{BrO}_3\text{S}^+$   $[\text{M}+\text{H}]^+$  364.98415, found 364.98410.

### 1-(4-iodophenyl)-2-((phenylsulfonyl)methyl)prop-2-en-1-one (**3ka**)

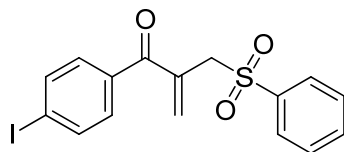

The reaction was conducted with 1-(4-iodophenyl)ethanone (**1k**, 49.2 mg, 0.2 mmol) and sodium benzenesulfinate (**2a**, 82 mg, 0.5 mmol). The residue was purified by column chromatography on silica gel (petroleum ether/ethyl acetate = 10:1) to yield the desired product **3ka** as White solid (26.1 mg, 31% yield), mp = 103-106 °C.

$^1\text{H}$  NMR (400 MHz,  $\text{CDCl}_3$ )  $\delta$  7.91-7.89 (m, 2H), 7.81 (d,  $J$  = 8.4 Hz, 2H), 7.62 (t,  $J$  = 7.5 Hz, 1H), 7.53 (t,  $J$  = 7.6 Hz, 2H), 7.40 (d,  $J$  = 8.4 Hz, 2H), 6.28 (s, 1H), 6.00 (s, 1H), 4.35 (s, 2H).  $^{13}\text{C}$  NMR (100 MHz,  $\text{CDCl}_3$ )  $\delta$

193.5, 139.2, 138.8, 135.5, 134.4, 134.0, 133.8, 131.1, 129.3, 128.7, 128.3, 57.8. HRMS calcd. for:  $C_{16}H_{14}IO_3S^+$   
[M+H]<sup>+</sup> 412.97028, found 412.97052.

### 2-((phenylsulfonyl)methyl)-1-(m-tolyl)prop-2-en-1-one (3la)

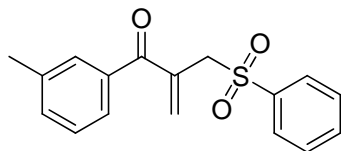

The reaction was conducted with 1-(m-tolyl)ethanone (**1l**, 27  $\mu$ L, 0.2 mmol) and sodium benzenesulfinate (**2a**, 82 mg, 0.5 mmol). The residue was purified by column chromatography on silica gel (petroleum ether/ethyl acetate = 10:1) to yield the desired product **3la** as Yellow oil. (50 mg, 83% yield).

<sup>1</sup>H NMR (400 MHz, CDCl<sub>3</sub>)  $\delta$  7.94-7.86 (m, 2H), 7.63-7.57 (m, 1H), 7.55-7.48 (m, 2H), 7.46-7.40 (m, 2H), 7.37-7.28 (m, 2H), 6.27 (s, 1H), 6.03 (s, 1H), 4.37 (d, J = 0.6 Hz, 2H), 2.38 (s, 3H). <sup>13</sup>C NMR (100 MHz, CDCl<sub>3</sub>)  $\delta$  194.8, 138.8, 138.1, 136.1, 135.7, 134.1, 133.9, 133.3, 129.9, 129.1, 128.3, 128.0, 126.8, 57.6, 21.2. HRMS calcd. for:  $C_{17}H_{16}O_3SNa^+$  [M+Na]<sup>+</sup> 323.07124, found 323.07123.

### 1-(3-methoxyphenyl)-2-((phenylsulfonyl)methyl)prop-2-en-1-one (3ma)

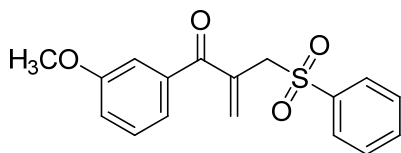

The reaction was conducted with 1-(3-methoxyphenyl)ethanone (**1m**, 27.5  $\mu$ L, 0.2 mmol) and sodium benzenesulfinate (**2a**, 82 mg, 0.5 mmol). The residue was purified by column chromatography on silica gel (petroleum ether/ethyl acetate = 9:1) to yield the desired product **3ma** as Yellow oil. (50 mg, 79% yield).

<sup>1</sup>H NMR (400 MHz, CDCl<sub>3</sub>)  $\delta$  7.92-7.90 (m, 2H), 7.63-7.59 (m, 1H), 7.52 (t, J = 7.6 Hz, 2H), 7.33 (t, J = 7.9 Hz, 1H), 7.23-7.21 (m, 1H), 7.17-7.16 (m, 1H), 7.09-7.07 (m, 1H), 6.25 (s, 1H), 6.05 (s, 1H), 4.37 (s, 2H), 3.83 (s, 3H). <sup>13</sup>C NMR (100 MHz, CDCl<sub>3</sub>)  $\delta$  194.4, 159.4, 138.7, 137.4, 135.6, 134.2, 133.9, 129.18, 129.15, 128.31, 122.2, 118.9, 114.0, 57.6, 55.4. HRMS calcd. for:  $C_{17}H_{17}O_4S^+$  [M+H]<sup>+</sup> 317.08421, found 317.08441.

### 2-((phenylsulfonyl)methyl)-1-(3-(trifluoromethyl)phenyl)prop-2-en-1-one(3na)

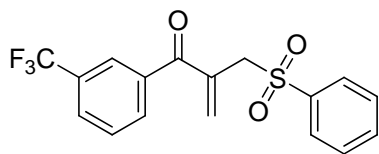

The reaction was conducted with 1-(3-(trifluoromethyl)phenyl)ethanone (**1n**, 30.5  $\mu$ L, 0.2 mmol) and sodium benzenesulfinate (**2a**, 82 mg, 0.5 mmol). The residue was purified by column chromatography on silica gel (petroleum ether/ethyl acetate = 9:1) to yield the desired product **3na** as Yellow oil. (50 mg, 71% yield).

$^1\text{H}$  NMR (400 MHz,  $\text{CDCl}_3$ )  $\delta$  7.93-7.91 (m, 2H), 7.88-7.87 (m, 2H), 7.81 (d,  $J$  = 7.6 Hz, 1H), 7.64-7.52 (m, 4H), 6.30 (s, 1H), 5.99 (s, 1H), 4.39 (s, 2H).  $^{13}\text{C}$  NMR (100 MHz,  $\text{CDCl}_3$ )  $\delta$  193.3, 138.6, 136.8, 135.5, 134.4, 134.1, 132.7, 129.3, 129.1, 129.0, 128.3, 126.2 (q,  $J$  = 3.80 Hz), 124.9, 122.2, 57.6. HRMS calcd. for:  $\text{C}_{17}\text{H}_{14}\text{F}_3\text{O}_3\text{S}^+$   $[\text{M}+\text{H}]^+$  355.06103, found 355.06116.

### 1-(3-fluorophenyl)-2-((phenylsulfonyl)methyl)prop-2-en-1-one(3oa)

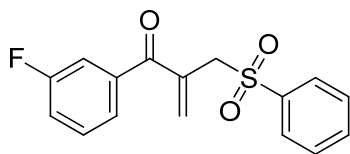

The reaction was conducted with 1-(3-fluorophenyl)ethanone (**1o**, 24.5  $\mu$ L, 0.2 mmol) and sodium benzenesulfinate (**2a**, 82 mg, 0.5 mmol). The residue was purified by column chromatography on silica gel (petroleum ether/ethyl acetate = 9:1) to yield the desired product **3oa** as Yellow oil. (48 mg, 79% yield).

$^1\text{H}$  NMR (400 MHz,  $\text{CDCl}_3$ )  $\delta$  7.92-7.90 (m, 2H), 7.63 (t,  $J$  = 7.4 Hz, 1H), 7.54 (t,  $J$  = 7.6 Hz, 2H), 7.47-7.41 (m, 2H), 7.35-7.32 (m, 1H), 7.28-7.23 (m, 1H), 6.29 (s, 1H), 6.04 (s, 1H), 4.36 (s, 2H).  $^{13}\text{C}$  NMR (100 MHz,  $\text{CDCl}_3$ )  $\delta$  193.3, 162.3 (d,  $J$  = 246.93 Hz), 138.7, 138.1 (d,  $J$  = 6.46 Hz), 135.1, 134.3, 134.0, 130.0 (d,  $J$  = 7.66 Hz), 129.2, 128.3, 125.3 (d,  $J$  = 2.95 Hz), 119.7 (d,  $J$  = 21.20 Hz), 116.3 (d,  $J$  = 22.59 Hz), 57.6. HRMS calcd. for: calcd for  $\text{C}_{16}\text{H}_{13}\text{FO}_3\text{SNa}^+$   $[\text{M}+\text{Na}]^+$  327.04616, found 327.04616.

### 1-(3-bromophenyl)-2-((phenylsulfonyl)methyl)prop-2-en-1-one(3pa)

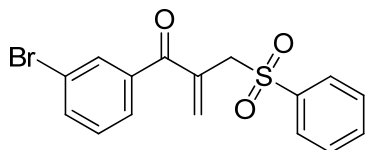

The reaction was conducted with 1-(3-bromophenyl)ethanone (**1p**, 26.5  $\mu$ L, 0.2 mmol) and sodium benzenesulfinate (**2a**, 82 mg, 0.5 mmol). The residue was purified by column chromatography on silica gel

(petroleum ether/ethyl acetate = 9:1) to yield the desired product **3pa** as White oil. (51.7 mg, 71% yield).

$^1\text{H}$  NMR (400 MHz,  $\text{CDCl}_3$ )  $\delta$  7.92-7.90 (m, 2H), 7.74-7.73 (m, 1H), 7.69-7.52 (m, 5H), 7.32 (t,  $J$  = 7.8 Hz, 1H), 6.29 (s, 1H), 6.02 (s, 1H), 4.36 (s, 2H).  $^{13}\text{C}$  NMR (100 MHz,  $\text{CDCl}_3$ )  $\delta$  193.2, 138.6, 137.9, 135.5, 135.4, 134.4, 134.0, 132.2, 129.9, 129.2, 128.3, 128.1, 122.5, 57.5. HRMS calcd. for:  $\text{C}_{16}\text{H}_{14}\text{BrO}_3\text{S}^+$   $[\text{M}+\text{H}]^+$  364.98415, found 364.98428;

### 2-((phenylsulfonyl)methyl)-1-(o-tolyl)prop-2-en-1-one (3qa)

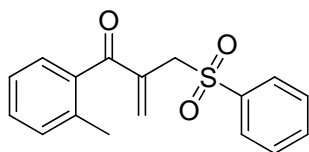

The reaction was conducted with 1-(o-tolyl)ethanone (**1q**, 26.1  $\mu\text{L}$ , 0.2 mmol) and sodium benzenesulfinate (**2a**, 82 mg, 0.5 mmol). The residue was purified by column chromatography on silica gel (petroleum ether/ethyl acetate = 10:1) to yield the desired product **3qa** as White solid. (47.2 mg, 79% yield). mp = 148-151  $^\circ\text{C}$ .

$^1\text{H}$  NMR (400 MHz,  $\text{CDCl}_3$ )  $\delta$  7.96-7.93 (m, 2H), 7.67-7.63 (m, 1H), 7.58-7.55 (m, 2H), 7.35-7.31 (m, 1H), 7.22-7.12 (m, 3H), 6.41 (s, 1H), 6.00 (s, 1H), 4.37 (s, 2H), 2.18 (s, 3H).  $^{13}\text{C}$  NMR (100 MHz,  $\text{CDCl}_3$ )  $\delta$  196.7, 138.9, 137.0, 136.8, 136.71, 136.68, 133.9, 131.0, 130.4, 129.2, 128.5, 128.2, 125.0, 55.5, 19.5. HRMS calcd. for:  $\text{C}_{17}\text{H}_{17}\text{O}_3\text{S}^+$   $[\text{M}+\text{H}]^+$  301.08929, found 301.08908.

### 1-(2-nitrophenyl)-2-((phenylsulfonyl)methyl)prop-2-en-1-one (3ra)

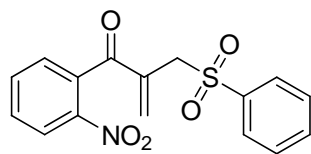

The reaction was conducted with 1-(2-nitrophenyl)ethanone (**1r**, 26.6  $\mu\text{L}$ , 0.2 mmol) and sodium benzenesulfinate (**2a**, 82 mg, 0.5 mmol). The residue was purified by column chromatography on silica gel (petroleum ether/ethyl acetate = 8:1) to yield the desired product **3ra** as White solid (43.1 mg, 65% yield). mp = 137-140  $^\circ\text{C}$ .

$^1\text{H}$  NMR (400 MHz,  $\text{CDCl}_3$ )  $\delta$  8.18-8.16 (m, 1H), 7.98-7.96 (m, 2H), 7.75-7.58 (m, 5H), 7.28-7.26 (m, 1H), 6.45 (s, 1H), 5.87 (s, 1H), 4.37 (s, 2H).  $^{13}\text{C}$  NMR (100 MHz,  $\text{CDCl}_3$ )  $\delta$  192.06, 146.32, 138.72, 136.16, 135.78, 134.53, 134.10, 134.00, 130.78, 129.17, 128.76, 128.46, 124.49, 77.32, 77.00, 76.68, 55.10. HRMS calcd. for:  $\text{C}_{16}\text{H}_{13}\text{NO}_5\text{S}^+$   $[\text{M}+\text{H}]^+$  332.05872, found 332.05869.

### 1-(2-fluorophenyl)-2-((phenylsulfonyl)methyl)prop-2-en-1-one (3sa)

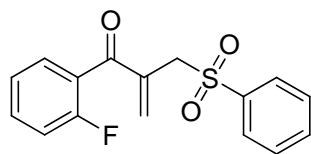

The reaction was conducted with 1-(2-fluorophenyl)ethanone (**1s**, 24  $\mu$ L, 0.2 mmol) and sodium benzenesulfinate (**2a**, 82 mg, 0.5 mmol). The residue was purified by column chromatography on silica gel (petroleum ether/ethyl acetate = 9:1) to yield the desired product **3s** as yellow solid. (37.0 mg, 61% yield). mp = 92 - 96 °C.

$^1\text{H}$  NMR (400 MHz,  $\text{CDCl}_3$ )  $\delta$  7.93 (d,  $J$  = 7.8 Hz, 2H), 7.64 (t,  $J$  = 7.4 Hz, 1H), 7.55 (t,  $J$  = 7.6 Hz, 2H), 7.50-7.45 (m, 1H), 7.31-7.27 (m, 1H), 7.19 (t,  $J$  = 7.5 Hz, 1H), 7.13-7.08 (m, 1H), 6.40 (s, 1H), 6.11-6.10 (m, 1H), 4.34 (s, 2H).  $^{13}\text{C}$  NMR (100 MHz,  $\text{CDCl}_3$ )  $\delta$  191.5, 159.6 (d,  $J$  = 251.18 Hz), 136.6, 136.5 (d,  $J$  = 12.20 Hz), 136.4, 133.9, 133.1 (d,  $J$  = 8.28 Hz), 130.4 (d,  $J$  = 2.72 Hz), 129.1, 128.6, 125.3 (d,  $J$  = 14.76 Hz), 124.2 (d,  $J$  = 3.60 Hz), 116.2 (d,  $J$  = 21.44 Hz), 55.94. HRMS calcd. for:  $\text{C}_{16}\text{H}_{14}\text{FO}_3\text{S}^+$   $[\text{M}+\text{H}]^+$  305.06422, found 305.06430.

### 1-(2-chlorophenyl)-2-((phenylsulfonyl)methyl)prop-2-en-1-one (3ta)

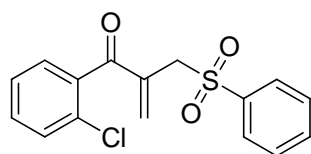

The reaction was conducted with 1-(2-chlorophenyl)ethanone (**1t**, 26  $\mu$ L, 0.2 mmol) and sodium benzenesulfinate (**2a**, 82 mg, 0.5 mmol). The residue was purified by column chromatography on silica gel (petroleum ether/ethyl acetate = 10:1) to yield the desired product **3ta** as white solid (53.7 mg, 84% yield). mp = 115-118 °C.

$^1\text{H}$  NMR (400 MHz,  $\text{CDCl}_3$ )  $\delta$  7.95-7.92 (m, 2H), 7.68-7.64 (m, 1H), 7.59-7.55 (m, 2H), 7.38-7.37 (m, 2H), 7.31-7.27 (m, 1H), 7.12-7.10 (m, 1H), 6.50 (s, 1H), 6.03 (s, 1H), 4.36 (s, 2H).  $^{13}\text{C}$  NMR (100 MHz,  $\text{CDCl}_3$ )  $\delta$  193.5, 138.6, 137.8, 136.8, 136.1, 133.9, 131.2, 131.0, 130.0, 129.1, 128.9, 128.5, 126.45, 55.0. HRMS calcd. for:  $\text{C}_{16}\text{H}_{14}\text{ClO}_3\text{S}^+$   $[\text{M}+\text{H}]^+$  321.03467, found 321.03442.

### 1-(2,4-dimethylphenyl)-2-((phenylsulfonyl)methyl)prop-2-en-1-one (3ua)

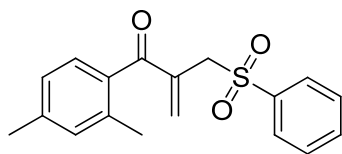

The reaction was conducted with 1-(2,4-dimethylphenyl)ethanone (**1u**, 30  $\mu$ L, 0.2 mmol) and sodium benzenesulfinate (**2a**, 82 mg, 0.5 mmol). The residue was purified by column chromatography on silica gel (petroleum ether/ethyl acetate = 10:1) to yield the desired product **3ua** as white solid (50.4 mg, 81% yield). mp = 146-149  $^{\circ}$ C.

$^1\text{H}$  NMR (400 MHz,  $\text{CDCl}_3$ )  $\delta$  7.93 (d,  $J$  = 8.0 Hz, 2H), 7.63 (t,  $J$  = 7.4 Hz, 1H), 7.55 (t,  $J$  = 7.3 Hz, 2H), 7.07 (d,  $J$  = 7.7 Hz, 1H), 7.02-6.97 (m, 2H), 6.37-6.36 (s, 1H), 5.99 (s, 1H), 4.36 (s, 2H), 2.33 (s, 3H), 2.17 (s, 3H).  $^{13}\text{C}$  NMR (100 MHz,  $\text{CDCl}_3$ )  $\delta$  196.4, 140.8, 138.9, 137.1, 137.1, 136.0, 133.9, 133.8, 131.9, 129.1, 128.9, 128.5, 125.6, 55.8, 21.3, 19.6. HRMS calcd. for:  $\text{C}_{18}\text{H}_{19}\text{O}_3\text{S}^+$   $[\text{M}+\text{H}]^+$  315.10494, found 315.10519.

### 1-(2,5-dichlorophenyl)-2-((phenylsulfonyl)methyl)prop-2-en-1-one (3va)

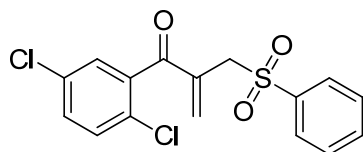

The reaction was conducted with 1-(2,5-dichlorophenyl)ethanone (**1v**, 37.8 mg, 0.2 mmol) and sodium benzenesulfinate (**2a**, 82 mg, 0.5 mmol). The residue was purified by column chromatography on silica gel (petroleum ether/ethyl acetate = 10:1) to yield the desired product **3va** as yellow solid. (53.0 mg, 75% yield). mp = 124-127  $^{\circ}$ C.

$^1\text{H}$  NMR (400 MHz,  $\text{CDCl}_3$ )  $\delta$  7.94-7.92 (m, 2H), 7.68 (t,  $J$  = 7.4 Hz, 1H), 7.59 (t,  $J$  = 7.6 Hz, 2H), 7.34-7.33 (m, 2H), 7.01 (d,  $J$  = 2.2 Hz, 1H), 6.56 (s, 1H), 6.05 (s, 1H), 4.34 (s, 2H).  $^{13}\text{C}$  NMR (100 MHz,  $\text{CDCl}_3$ )  $\delta$  192.1, 138.6, 138.19, 138.17, 135.9, 134.1, 132.8, 131.3, 131.2, 129.3, 129.2, 128.7, 128.6, 54.94. HRMS calcd. for:  $\text{C}_{16}\text{H}_{13}\text{Cl}_2\text{O}_3\text{S}^+$   $[\text{M}+\text{H}]^+$  354.99570, found 354.99600.

### 1-(3,4-dimethoxyphenyl)-2-((phenylsulfonyl)methyl)prop-2-en-1-one (3wa)

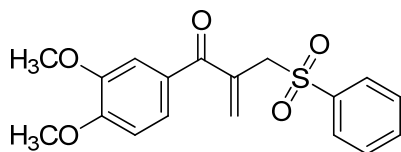

The reaction was conducted with 1-(3,4-dimethoxyphenyl)ethanone (**1w**, 30  $\mu$ L, 0.2 mmol) and sodium



benzenesulfinate (**2a**, 82 mg, 0.5 mmol). The residue was purified by column chromatography on silica gel (petroleum ether/ethyl acetate = 6:1) to yield the desired product **3wa** as white solid (50.5 mg, 75% yield). mp = 135-138 °C.

<sup>1</sup>H NMR (400 MHz, CDCl<sub>3</sub>) δ 7.90 (d, *J* = 7.6 Hz, 2H), 7.60 (t, *J* = 7.3 Hz, 1H), 7.51 (t, *J* = 7.7 Hz, 2H), 7.40 (dd, *J* = 8.3, 1.0 Hz, 1H), 7.31 (s, 1H), 6.88 (d, *J* = 8.4 Hz, 1H), 6.15 (s, 1H), 5.98 (s, 1H), 4.37 (s, 2H), 3.95 (s, 3H), 3.91 (s, 3H). <sup>13</sup>C NMR (100 MHz, CDCl<sub>3</sub>) δ 193.3, 153.2, 148.8, 138.7, 135.4, 133.8, 132.2, 129.1, 128.6, 128.2, 125.0, 111.6, 109.6, 58.4, 56.0, 55.9. HRMS calcd. for: C<sub>18</sub>H<sub>19</sub>O<sub>5</sub>S<sup>+</sup> [M+H]<sup>+</sup> 347.09477, found 347.09488

### 1-(naphthalen-1-yl)-2-((phenylsulfonyl)methyl)prop-2-en-1-one (**3xa**)

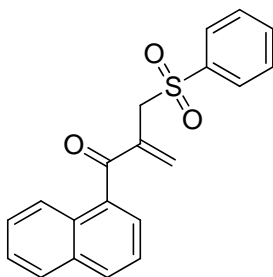

The reaction was conducted with 1-(naphthalen-1-yl)ethanone (**1x**, 30.4 μL, 0.2 mmol) and sodium benzenesulfinate (**2a**, 82 mg, 0.5 mmol). The residue was purified by column chromatography on silica gel (petroleum ether/ethyl acetate = 10:1) to yield the desired product **3xa** as white solid. (55.8 mg, 84% yield). mp = 127-130 °C.

<sup>1</sup>H NMR (400 MHz, CDCl<sub>3</sub>) δ 7.99-7.93 (m, 3H), 7.88-7.85 (m, 1H), 7.77-7.75 (m, 1H), 7.69 -7.65 (m, 1H), 7.60-7.56 (m, 2H), 7.53-7.43 (m, 4H), 6.42 (s, 1H), 6.06 (s, 1H), 4.47 (s, 2H). <sup>13</sup>C NMR (100 MHz, CDCl<sub>3</sub>) δ 196.0, 138.8, 137.4, 137.0, 134.5, 133.9, 133.5, 131.4, 130.6, 129.2, 128.5, 128.3, 127.4, 127.3, 126.5, 125.1, 124.1, 55.78. HRMS calcd. for: C<sub>20</sub>H<sub>17</sub>O<sub>3</sub>S<sup>+</sup> [M+H]<sup>+</sup> 337.08929, found 337.08929.

### 1-(naphthalen-2-yl)-2-((phenylsulfonyl)methyl)prop-2-en-1-one (**3ya**)

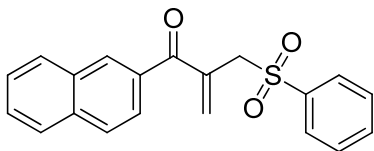

The reaction was conducted with 1-(naphthalen-2-yl)ethanone (**1y**, 34.0 mg, 0.2 mmol) and sodium benzenesulfinate (**2a**, 82 mg, 0.5 mmol). The residue was purified by column chromatography on silica gel (petroleum ether/ethyl acetate = 10:1) to yield the desired product **3ya** as white solid. (52.8 mg, 79% yield). mp

= 94-95 °C.

$^1\text{H}$  NMR (400 MHz,  $\text{CDCl}_3$ )  $\delta$  8.17 (s, 1H), 7.95-7.92 (m, 3H), 7.87 (d,  $J$  = 8.4 Hz, 2H), 7.75-7.72 (m, 1H), 7.62-7.54 (m, 3H), 7.50 (t,  $J$  = 7.5 Hz, 2H), 6.32 (s, 1H), 6.10 (s, 1H), 4.43 (s, 2H).  $^{13}\text{C}$  NMR (100 MHz,  $\text{CDCl}_3$ )  $\delta$  194.5, 138.7, 135.7, 135.2, 134.0, 133.9, 133.2, 132.0, 131.3, 129.3, 129.2, 128.4, 128.3, 128.3, 127.7, 126.9, 125.2, 57.80. HRMS calcd. for:  $\text{C}_{20}\text{H}_{17}\text{O}_3\text{S}^+ [\text{M}+\text{H}]^+$  337.08929, found 337.08929.

### 1-(furan-2-yl)-2-((phenylsulfonyl)methyl)prop-2-en-1-one (3za)

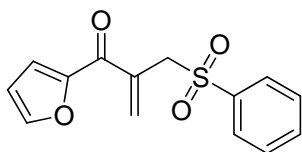

The reaction was conducted with 1-(furan-2-yl)ethanone (**1z**, 20.0  $\mu\text{L}$ , 0.2 mmol) and sodium benzenesulfinate (**2a**, 82 mg, 0.5 mmol). The residue was purified by column chromatography on silica gel (petroleum ether/ethyl acetate = 8:1) to yield the desired product **3za** as white solid (36.5 mg, 66% yield). mp = 153-156 °C.

$^1\text{H}$  NMR (400 MHz,  $\text{CDCl}_3$ )  $\delta$  7.86-7.84 (m, 2H), 7.63 (m, 1H), 7.60-7.56 (m, 1H), 7.49-7.45 (m, 2H), 7.14 (d,  $J$  = 3.6 Hz, 1H), 6.55-6.53 (m, 1H), 6.42 (s, 1H), 6.17 (s, 1H), 4.31 (s, 2H).  $^{13}\text{C}$  NMR (100 MHz,  $\text{CDCl}_3$ )  $\delta$  180.1, 151.1, 147.3, 138.4, 135.3, 133.9, 132.4, 129.0, 128.5, 120.5, 112.2, 57.87. HRMS calcd. for:  $\text{C}_{14}\text{H}_{12}\text{O}_4\text{SNa}^+ [\text{M}+\text{Na}]^+$  299.03485, found 299.03500.

### 2-((phenylsulfonyl)methyl)-1-(thiophen-2-yl)prop-2-en-1-one (3aaa)

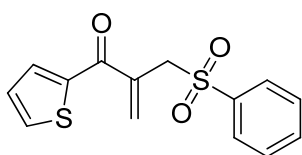

The reaction was conducted with 1-(thiophen-2-yl)ethanone (**1aa**, 21.6  $\mu\text{L}$ , 0.2 mmol) and sodium benzenesulfinate (**2a**, 82 mg, 0.5 mmol). The residue was purified by column chromatography on silica gel (petroleum ether/ethyl acetate = 9:1) to yield the desired product **3aaa** as white solid (45.7 mg, 78% yield). mp = 124-127 °C.

$^1\text{H}$  NMR (400 MHz,  $\text{CDCl}_3$ )  $\delta$  7.86 (d,  $J$  = 8.0 Hz, 2H), 7.68 (d,  $J$  = 4.9 Hz, 1H), 7.63-7.62 (m, 1H), 7.58 (t,  $J$  = 7.4 Hz, 1H), 7.47 (t,  $J$  = 7.7 Hz, 2H), 7.13 (t,  $J$  = 4.3 Hz, 1H), 6.21 (m, 1H), 6.10 (m, 1H), 4.33 (s, 2H).  $^{13}\text{C}$  NMR (100 MHz,  $\text{CDCl}_3$ )  $\delta$  185.8, 141.7, 138.3, 135.9, 134.7, 134.6, 133.9, 131.5, 129.1, 128.4, 127.9, 58.3. HRMS calcd. for: calcd for  $\text{C}_{14}\text{H}_{13}\text{O}_3\text{S}_2^+ [\text{M}+\text{H}]^+$  293.03006, found 293.03040.

### 2-((phenylsulfonyl)methyl)-1-(pyridin-3-yl)prop-2-en-1-one (**3aba**)

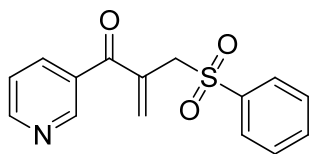

The reaction was conducted with 1-(pyridin-3-yl)ethanone (**1ab**, 22.0  $\mu$ L, 0.2 mmol) and sodium benzenesulfinate (**2a**, 82 mg, 0.5 mmol). The residue was purified by column chromatography on silica gel (petroleum ether/ethyl acetate = 5:1) to yield the desired product **3aba** as yellow oil (20.2 mg, 35% yield).

$^1\text{H}$  NMR (400 MHz,  $\text{CDCl}_3$ )  $\delta$  8.87 (s, 1H), 8.79-8.78 (m, 1H), 8.01-7.99 (m, 1H), 7.93-7.90 (m, 2H), 7.66-7.62 (m, 1H), 7.57-7.53 (m, 2H), 7.44-7.40 (m, 1H), 6.33 (s, 1H), 6.05 (s, 1H), 4.38 (m, 2H).  $^{13}\text{C}$  NMR (100 MHz,  $\text{CDCl}_3$ )  $\delta$  193.0, 153.1, 150.3, 138.5, 137.0, 135.7, 134.6, 134.1, 131.8, 129.3, 128.3, 123.3, 57.39. HRMS calcd. for:  $\text{C}_{15}\text{H}_{14}\text{NO}_3\text{S}^+$   $[\text{M}+\text{H}]^+$  288.06889, found 288.06894.

### 1-cyclopropyl-2-((phenylsulfonyl)methyl)prop-2-en-1-one (**3aca**)

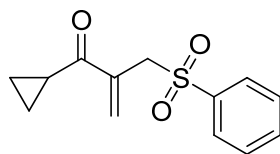

The reaction was conducted with 1-cyclopropylethanone (**1ac**, 20.0  $\mu$ L, 0.2 mmol) and sodium benzenesulfinate (**2a**, 82 mg, 0.5 mmol). The residue was purified by column chromatography on silica gel (petroleum ether/ethyl acetate = 10:1) to yield the desired product **3aca** as white solid (41.9 mg, 35% yield), mp = 99-101  $^\circ\text{C}$ .

$^1\text{H}$  NMR (400 MHz,  $\text{CDCl}_3$ )  $\delta$  7.85-7.83 (m, 2H), 7.63 (t,  $J$  = 7.4 Hz, 1H), 7.52 (t,  $J$  = 7.7 Hz, 2H), 6.52 (s, 1H), 6.27 (s, 1H), 4.20 (s, 2H), 2.32-2.26 (m, 1H), 0.87-0.82 (m, 4H).  $^{13}\text{C}$  NMR (100 MHz,  $\text{CDCl}_3$ )  $\delta$  198.4, 138.5, 137.3, 133.7, 131.5, 128.9, 128.6, 56.2, 15.8, 11.7. HRMS calcd. for:  $\text{C}_{13}\text{H}_{14}\text{O}_3\text{S}^+$   $[\text{M}+\text{H}]^+$  251.07364, found 251.07402.

### 3-((phenylsulfonyl)methyl)chroman-4-one (**5aa**)

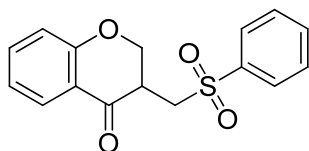

The reaction was conducted with 1-(2-hydroxyphenyl)ethanone (**4a**, 24.0  $\mu$ L, 0.2 mmol) and sodium benzenesulfinate (**2a**, 82 mg, 0.5 mmol). The residue was purified by column chromatography on silica gel (petroleum ether/ethyl acetate = 10:1) to yield the desired product **5aa** as white solid. (42.7 mg, 71% yield), mp

= 108–111 °C.

$^1\text{H}$  NMR (400 MHz,  $\text{CDCl}_3$ )  $\delta$  7.97 (d,  $J$  = 7.4 Hz, 2H), 7.84–7.82 (m, 1H), 7.69 (t,  $J$  = 7.4 Hz, 1H), 7.60 (t,  $J$  = 7.6 Hz, 2H), 7.52–7.48 (m, 1H), 7.04–6.99 (m, 2H), 5.02–4.09 (m, 1H), 4.35 (t,  $J$  = 11.8 Hz, 1H), 4.01–4.00 (m, 1H), 3.45–3.38 (m, 1H), 3.04–2.98 (m, 1H).  $^{13}\text{C}$  NMR (100 MHz,  $\text{CDCl}_3$ )  $\delta$  189.9, 161.6, 138.7, 136.5, 134.2, 129.5, 127.9, 127.5, 121.7, 119.9, 118.0, 69.5, 51.6, 40.7. HRMS calcd. for:  $\text{C}_{16}\text{H}_{14}\text{O}_4\text{SNa}^+$   $[\text{M}+\text{Na}]^+$  325.05050, found 325.05023.

### 6-fluoro-3-((phenylsulfonyl)methyl)chroman-4-one (5ba)

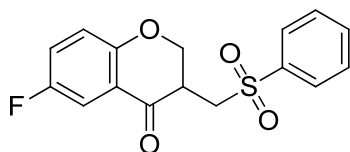

The reaction was conducted with 1-(5-fluoro-2-hydroxyphenyl)ethanone (**4b**, 31.0 mg, 0.2 mmol) and sodium benzenesulfinate (**2a**, 82 mg, 0.5 mmol). The residue was purified by column chromatography on silica gel (petroleum ether/ethyl acetate = 8:1) to yield the desired product **5ba** as white solid. (33.5 mg, 55% yield), mp = 141–144 °C.

$^1\text{H}$  NMR (400 MHz,  $\text{CDCl}_3$ )  $\delta$  7.98 - 7.96 (m, 2H), 7.72 - 7.70 (m, 1H), 7.63 - 7.60 (m, 2H), 7.49 - 7.46 (m, 1H), 7.26–7.21 (m, 1H), 7.01 - 6.98 (m, 1H), 5.03 - 4.99 (m, 1H), 4.34 (t,  $J$  = 11.9 Hz, 1H), 3.98 - 3.94 (m, 1H), 3.46 - 3.39 (m, 1H), 3.04- 2.98 (m, 1H).  $^{13}\text{C}$  NMR (100 MHz,  $\text{CDCl}_3$ )  $\delta$  188.8, 160.6, 139.2, 138.9, 134.3, 129.9, 129.6, 128.0, 121.2, 120.1, 114.5, 51.6, 40.6. HRMS calcd. for:  $\text{C}_{16}\text{H}_{14}\text{FO}_4\text{S}^+$   $[\text{M}+\text{H}]^+$  321.05913, found 321.05902.

### 6-bromo-3-((phenylsulfonyl)methyl)chroman-4-one (5ca)

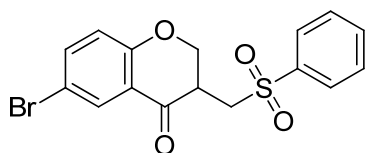

The reaction was conducted with 1-(5-bromo-2-hydroxyphenyl)ethanone (**4c**, 43.0 mg, 0.2 mmol) and sodium benzenesulfinate (**2a**, 82 mg, 0.5 mmol). The residue was purified by column chromatography on silica gel (petroleum ether/ethyl acetate = 8:1) to yield the desired product **5ca** as white solid. (29.2 mg, 39% yield), mp = 178–181 °C.

$^1\text{H}$  NMR (400 MHz,  $\text{CDCl}_3$ )  $\delta$  7.98–7.93 (m, 3H), 7.70 (t,  $J$  = 7.4 Hz, 1H), 7.63–7.56 (m, 3H), 6.91 (d,  $J$  = 8.9

Hz, 1H), 5.06-5.02 (m, 1H), 4.34 (t,  $J = 11.9$  Hz, 1H), 3.98-3.93 (m, 1H), 3.47-3.39 (m, 1H), 3.03-2.97 (m, 1H).  $^{13}\text{C}$  NMR (100 MHz,  $\text{CDCl}_3$ )  $\delta$  188.8, 160.5, 139.2, 138.8, 134.3, 129.9, 129.6, 127.9, 121.1, 120.1, 114.4, 69.7, 51.6, 40.6. HRMS calcd. for:  $\text{C}_{16}\text{H}_{14}\text{BrO}_4\text{S}^+$   $[\text{M}+\text{H}]^+$  380.97907, found 380.97949.

### 7-methoxy-3-((phenylsulfonyl)methyl)chroman-4-one (5da)

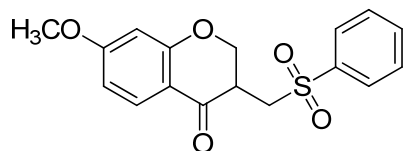

The reaction was conducted with 1-(2-hydroxy-4-methoxyphenyl)ethanone (**4d**, 33.2 mg, 0.2 mmol) and sodium benzenesulfinate (**2a**, 82 mg, 0.5 mmol). The residue was purified by column chromatography on silica gel (petroleum ether/ethyl acetate = 6:1) to yield the desired product **5da** as white solid. (40.6 mg, 61% yield), mp = 241 - 244 °C.

$^1\text{H}$  NMR (400 MHz,  $\text{CDCl}_3$ )  $\delta$  7.98-7.96 (m, 2H), 7.77 (d,  $J = 8.9$  Hz, 1H), 7.71-7.67 (m, 1H), 7.60 (t,  $J = 7.6$  Hz, 2H), 6.59-6.57 (m, 1H), 6.43 (d,  $J = 2.4$  Hz, 1H), 5.02-4.98 (m, 1H), 4.35 (t,  $J = 11.6$  Hz, 1H), 4.01-3.97 (m, 1H), 3.84 (s, 3H), 3.39-3.32 (m, 1H), 3.02-2.96 (m, 1H).  $^{13}\text{C}$  NMR (100 MHz,  $\text{CDCl}_3$ )  $\delta$  188.4, 166.4, 163.7, 138.9, 134.1, 129.5, 129.3, 128.0, 113.8, 110.6, 100.7, 69.9, 55.7, 51.9, 40.4. HRMS calcd. for:  $\text{C}_{17}\text{H}_{17}\text{O}_5\text{S}^+$   $[\text{M}+\text{H}]^+$  333.07912, found 333.07956.

### 3-((phenylsulfonyl)methyl)-2H-benzo[h]chromen-4(3H)-one (5ea)

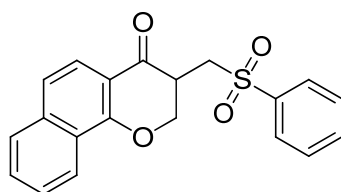

The reaction was conducted with 1-(1-hydroxynaphthalen-2-yl)ethanone (**4e**, 37.0 mg, 0.2 mmol) and sodium benzenesulfinate (**2a**, 82 mg, 0.5 mmol). The residue was purified by column chromatography on silica gel (petroleum ether/ethyl acetate = 10:1) to yield the desired product **5ea** as yellow solid. (24.9 mg, 61% yield), mp = 164–167 °C.

$^1\text{H}$  NMR (400 MHz,  $\text{CDCl}_3$ )  $\delta$  8.31 (d,  $J = 8.3$  Hz, 1H), 8.01-8.00 (m, 2H), 7.78 (d,  $J = 8.7$  Hz, 2H), 7.72-7.54 (m, 5H), 7.40 (d,  $J = 8.7$  Hz, 1H), 5.31-5.27 (m, 1H), 4.56 (t,  $J = 11.8$  Hz, 1H), 4.07-4.03 (m, 1H), 3.55-3.48 (m, 1H), 3.11-3.04 (m, 1H).  $^{13}\text{C}$  NMR (100 MHz,  $\text{CDCl}_3$ )  $\delta$  189.4, 160.2, 138.9, 137.6, 134.2, 130.1, 129.6, 128.0,

127.8, 126.5, 124.6, 123.5, 121.8, 121.5, 114.5, 70.3, 52.0, 40.2. HRMS calcd. for: C<sub>20</sub>H<sub>16</sub>O<sub>4</sub>SNa [M+Na]<sup>+</sup> 375.06615, found 375.06622.

### 2-methyl-1-phenyl-3-(phenylsulfonyl)propan-1-one (7a)

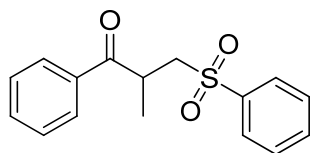

A 10 mL oven-dried reaction vessel was charged with 1-phenyl-2-((phenylsulfonyl)methyl)prop-2-en-1-one (**3aa**) (57.2 mg, 0.2 mmol), Sodium borohydride (3.8 mg, 0.1 mmol), NMP (1.0 mL) and trifluoroacetic acid (14.9  $\mu$ L, 0.2mmol) under air. The sealed reaction vessel was stirred at rt for 1.0 h. Then, the reaction was diluted with ethyl acetate (5 mL) and washed with saturated sodium chloride solution. The organic layer was separated, and the aqueous layer was extracted with ethyl acetate for three times. The combined organic layer was dried over magnesium sulfate and the volatiles were removed under reduced pressure. The residue was purified by column chromatography on silica gel (petroleum ether/ethyl acetate = 8:1) to yield the desired product **7a** as yellow solid (31.7 mg, 55% yield).

<sup>1</sup>H NMR (400 MHz, CDCl<sub>3</sub>)  $\delta$  7.92-7.86 (m, 4H), 7.92-7.86 (m, 2H), 7.52-7.46(m, 4H), 4.21-4.17(m, 1H), 3.94-3.87(m, 1H), 3.21-3.16(m, 1H), 1.35 (d, *J* = 7.2 Hz, 3H). <sup>13</sup>C NMR (100 MHz, CDCl<sub>3</sub>)  $\delta$  200.0, 139.4, 134.8, 133.8, 133.6, 129.3, 128.8, 128.5, 127.9, 58.5, 35.5, 18.7.

### 1-phenyl-3-(phenylsulfonyl)-2-((phenylsulfonyl)methyl)propan-1-one (8a)

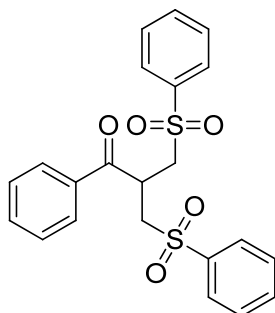

A 10 mL oven-dried reaction vessel was charged with 1-phenyl-2-((phenylsulfonyl)methyl)prop-2-en-1-one (**3aa**) (28.6 mg, 0.2 mmol), benzenesulfonylhydrazide (17.2 mg, 0.1 mmol) and H<sub>2</sub>O (0.5 mL) under air. The sealed reaction vessel was stirred at 65 °C for 10 h. After cooling to room temperature, the reaction was diluted with ethyl acetate (5 mL) and washed with saturated sodium chloride solution. The organic layer was separated, and the aqueous layer was extracted with ethyl acetate for three times. The combined organic layer was dried over

magnesium sulfate and the volatiles were removed under reduced pressure. The residue was purified by column chromatography on silica gel (petroleum ether/ethyl acetate = 7.5:1) to yield the desired product **8a** as white solid (30.0 mg, 70% yield).

$^1\text{H}$  NMR (400 MHz,  $\text{CDCl}_3$ )  $\delta$  7.86-7.83 (m, 4H), 7.73-7.70 (m, 2H), 7.60-7.55 (m, 7H), 7.38-7.34 (m, 2H), 4.38-4.35 (m, 1H), 3.70-3.65 (m, 2H), 3.56-3.51 (m, 2H).  $^{13}\text{C}$  NMR (100 MHz,  $\text{CDCl}_3$ )  $\delta$  195.0, 138.2, 134.23, 134.19, 133.8, 129.5, 129.0, 128.4, 128.3, 55.2, 35.2.

# NMR Spectra for the compounds prepared

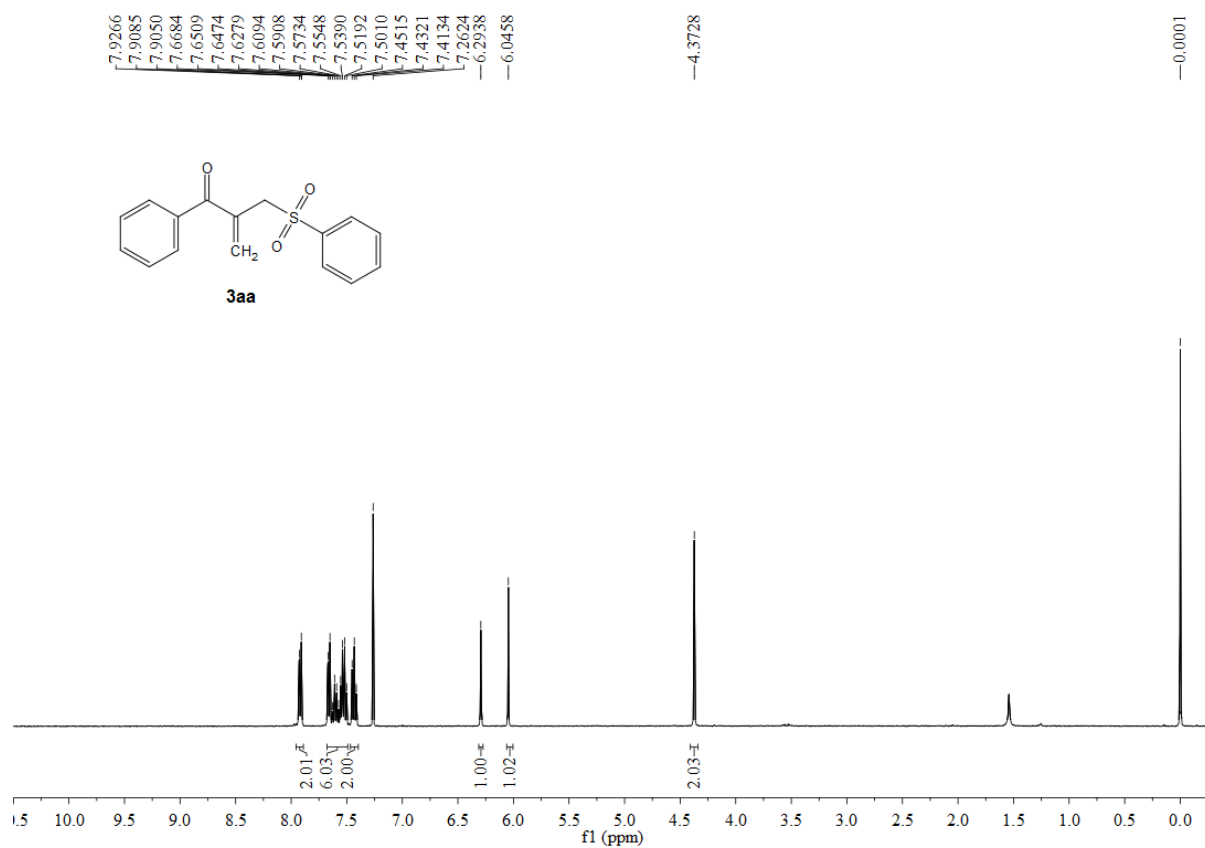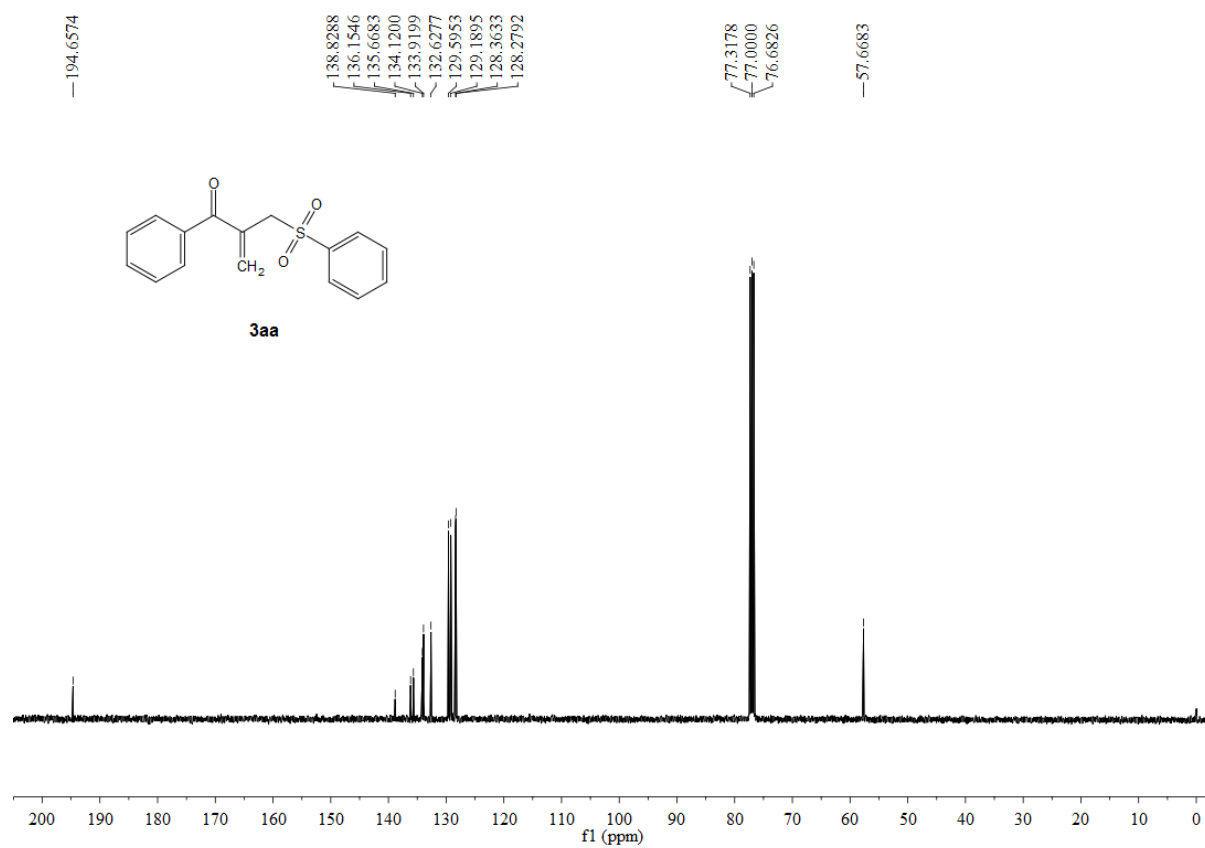



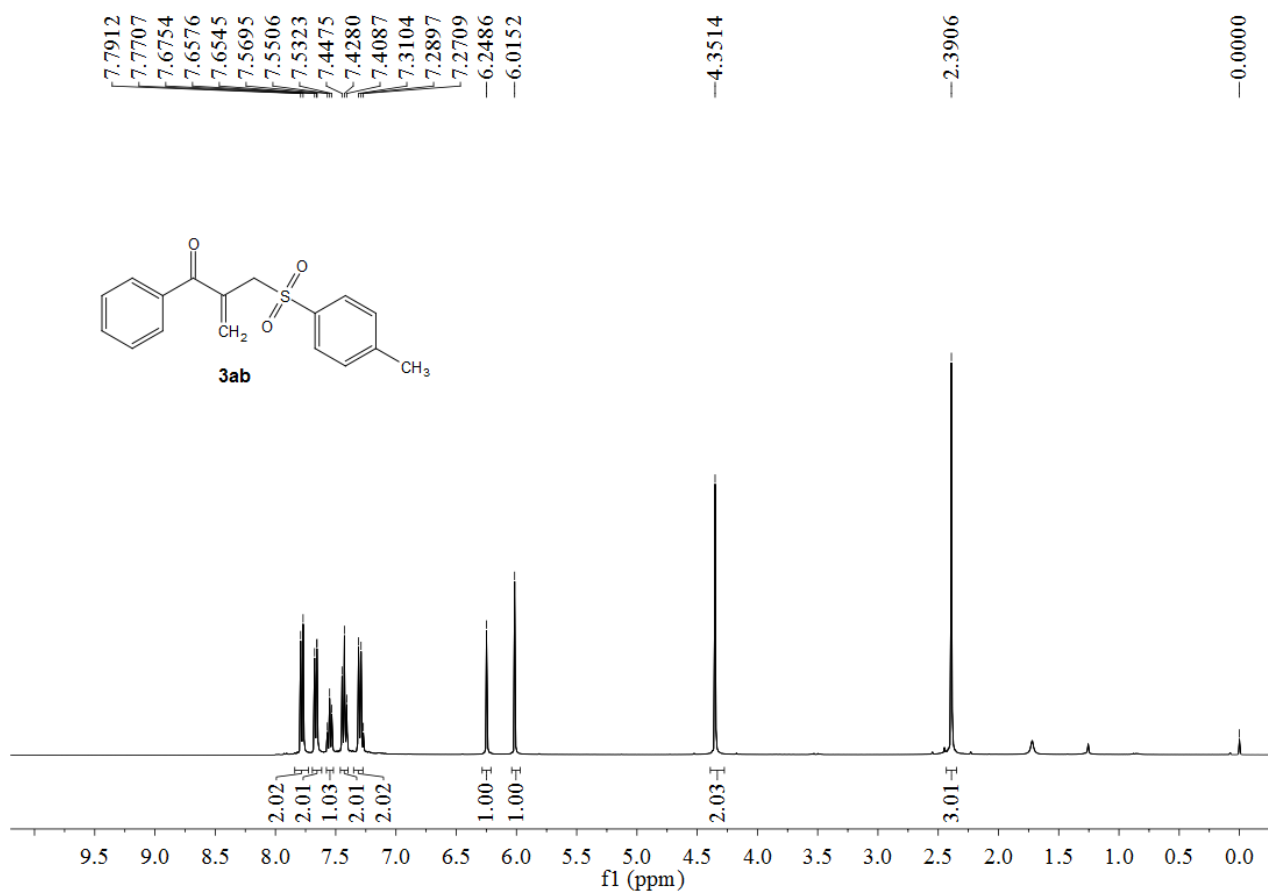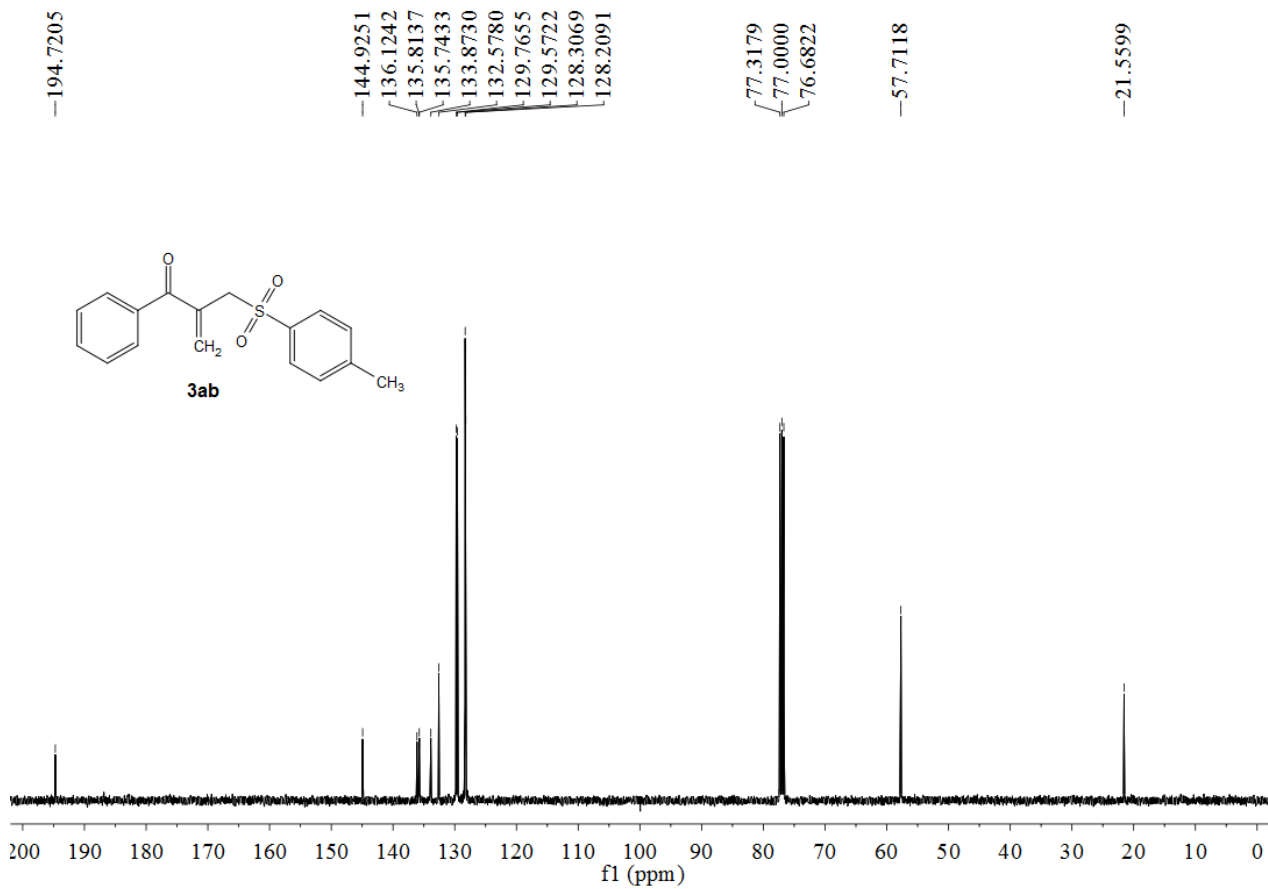

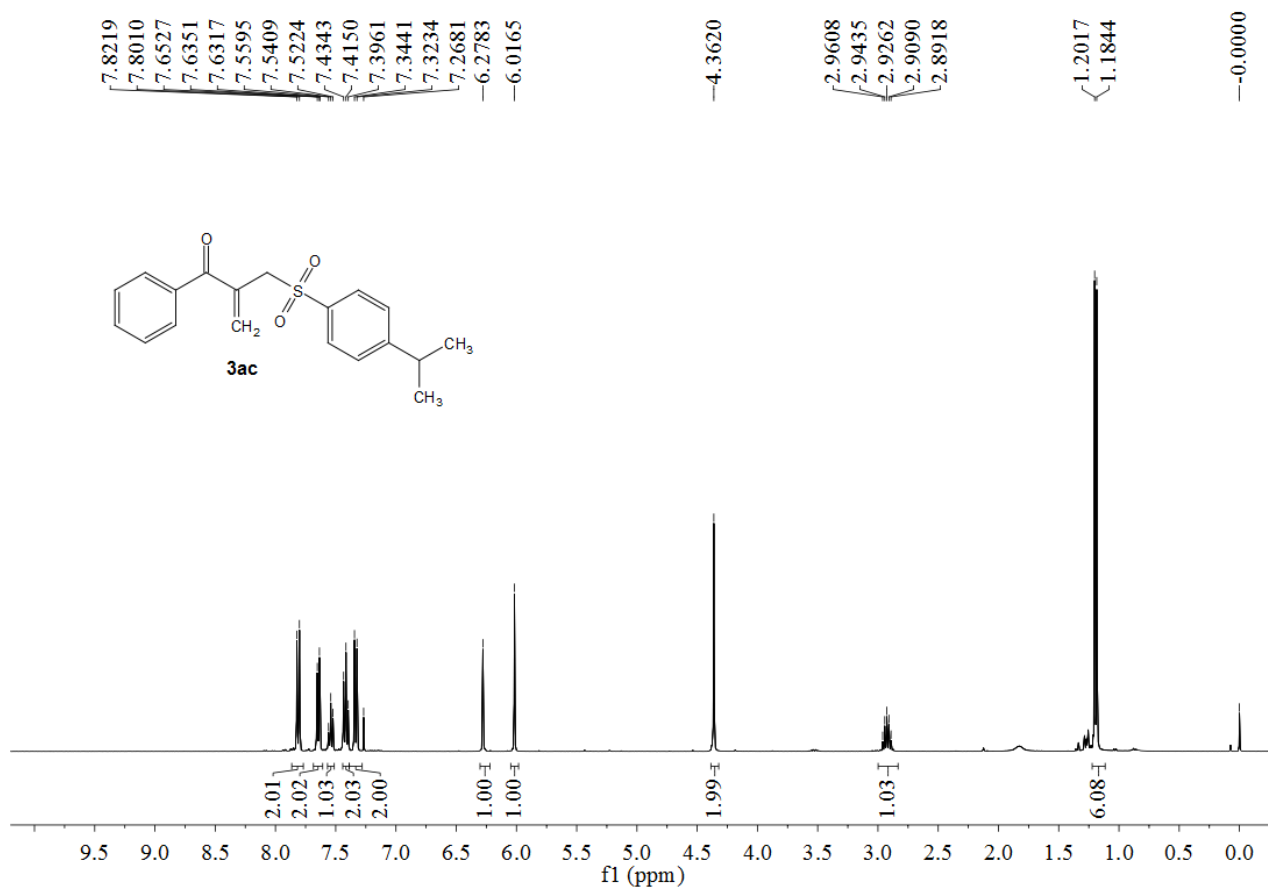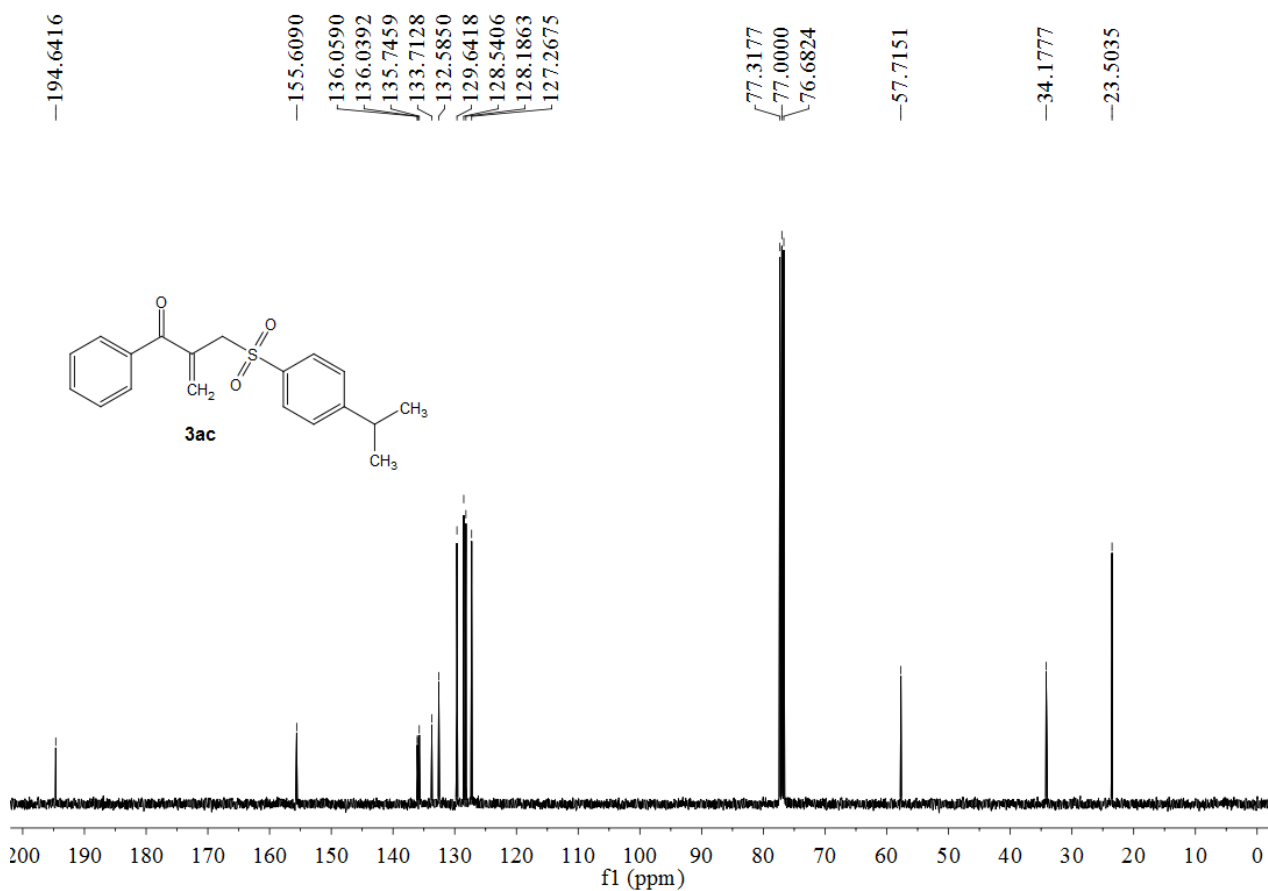

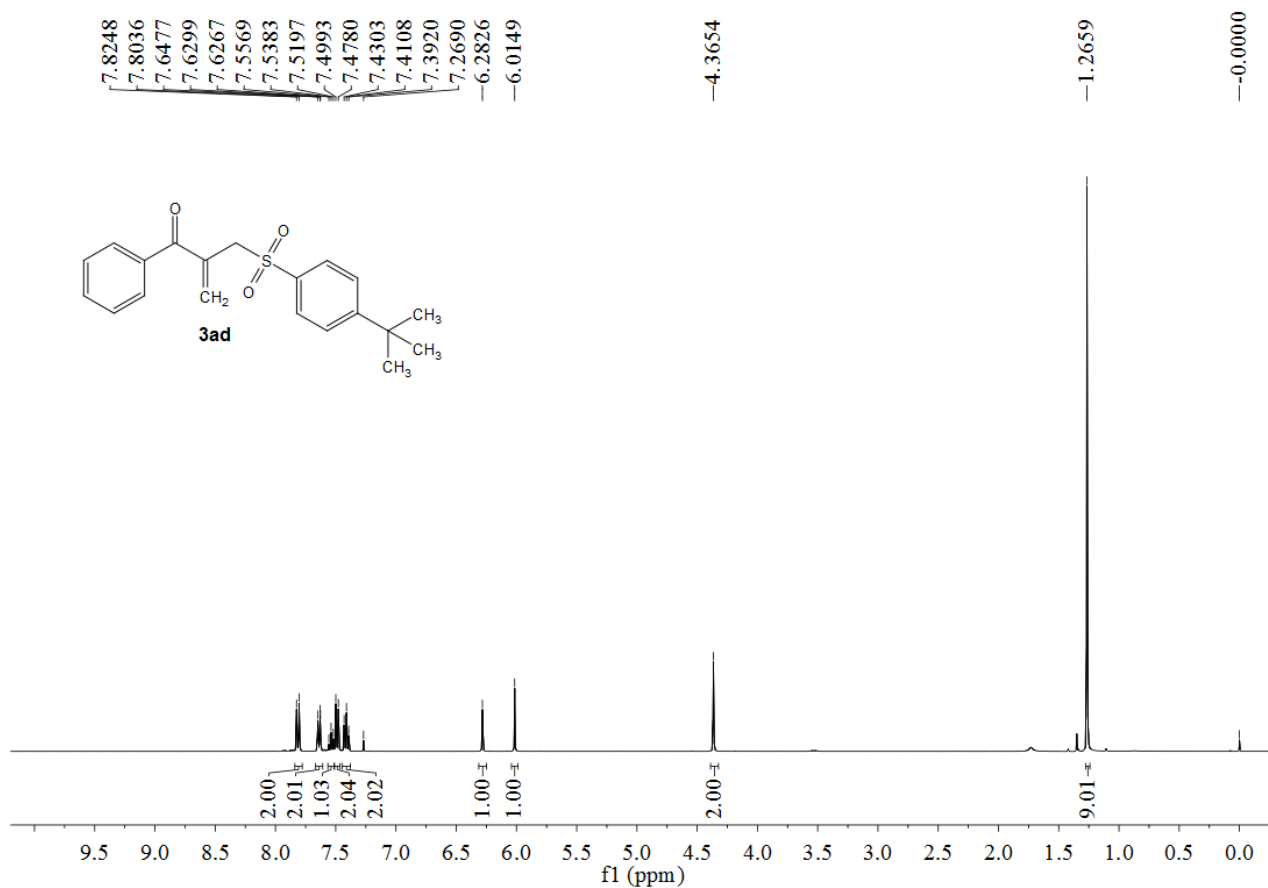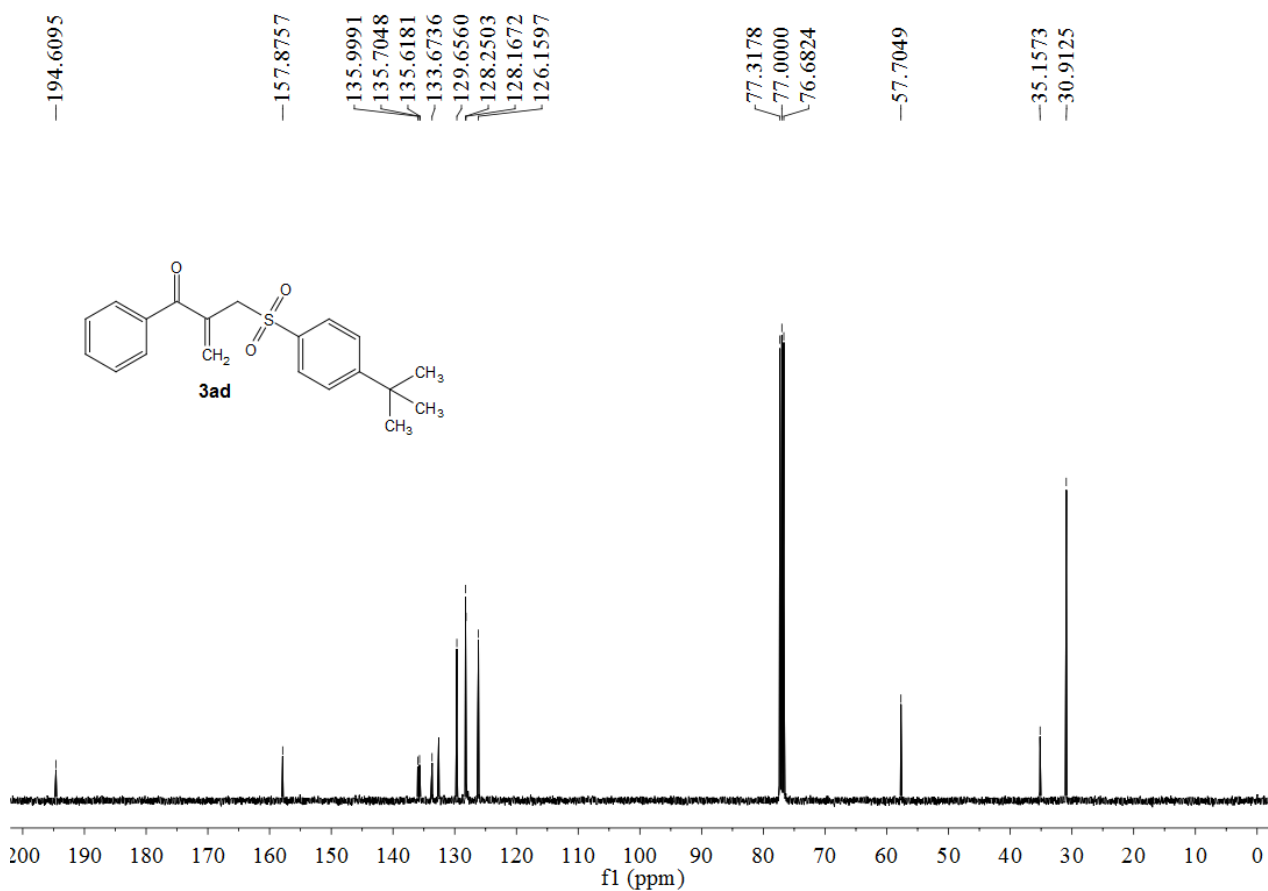

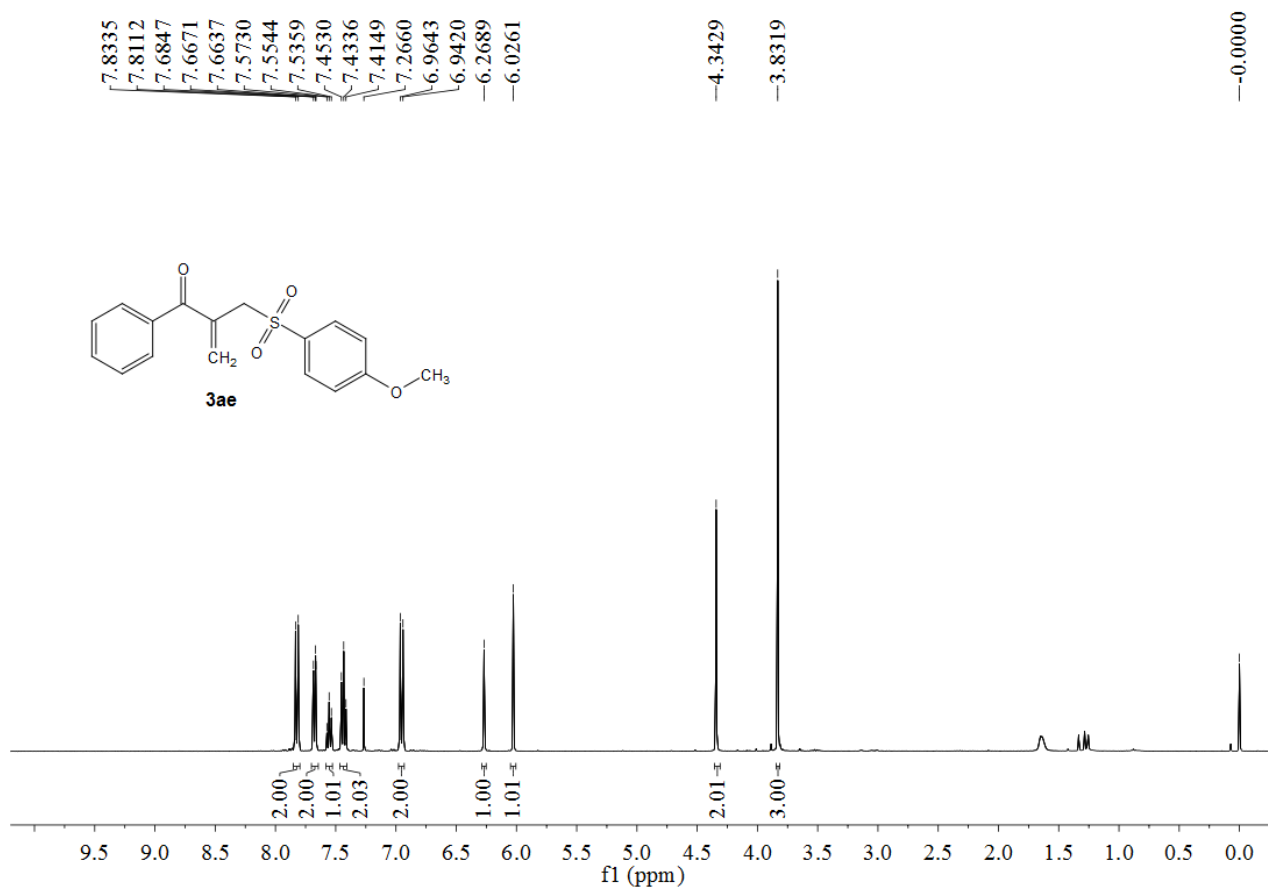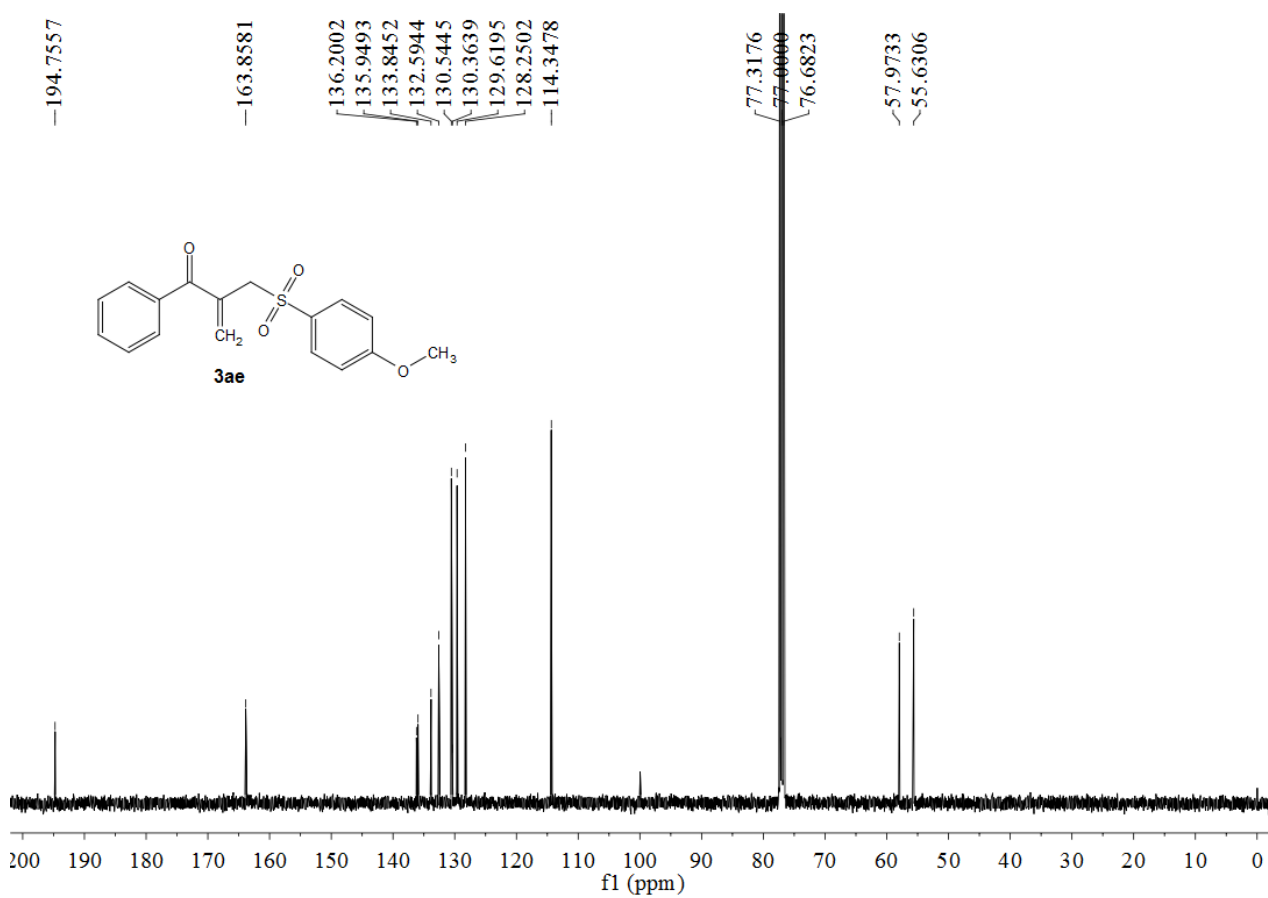

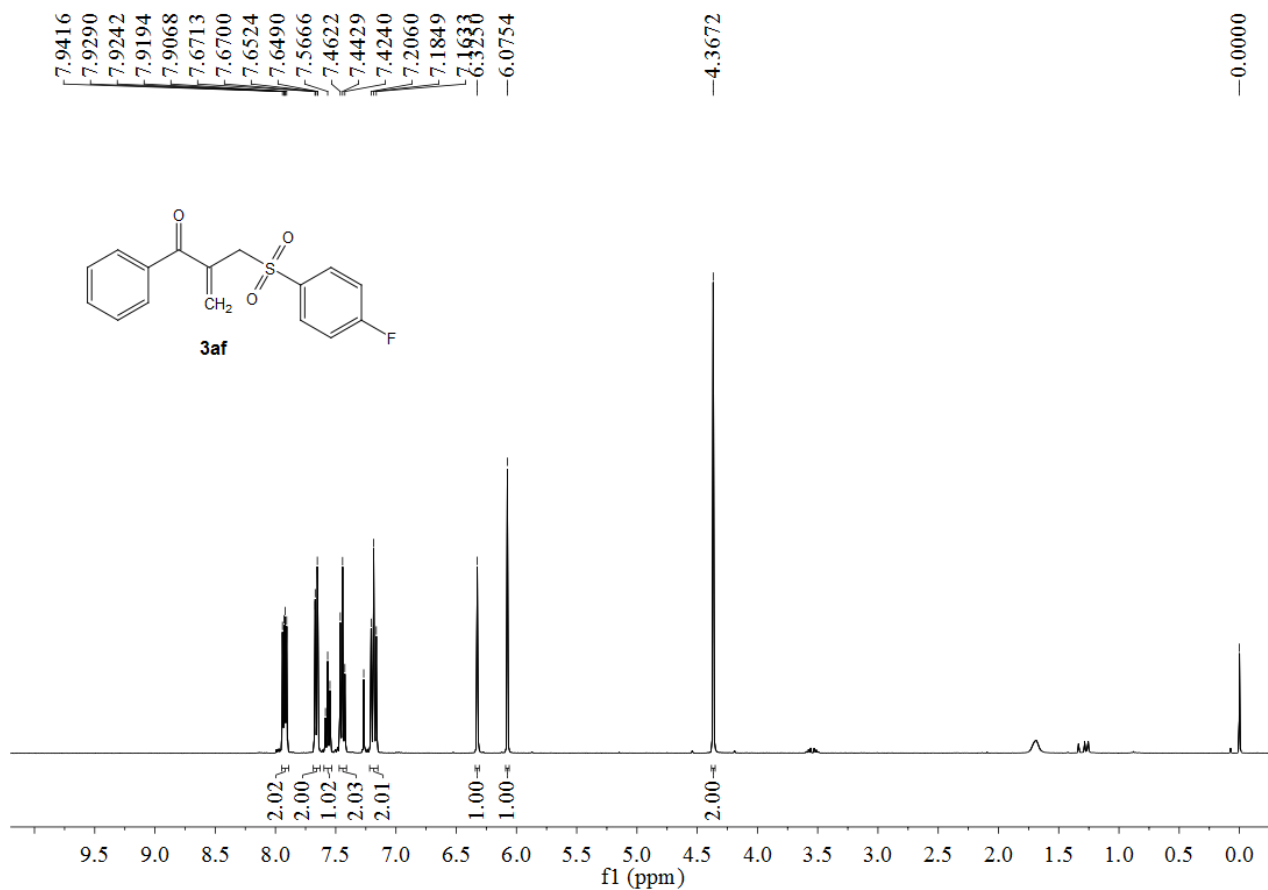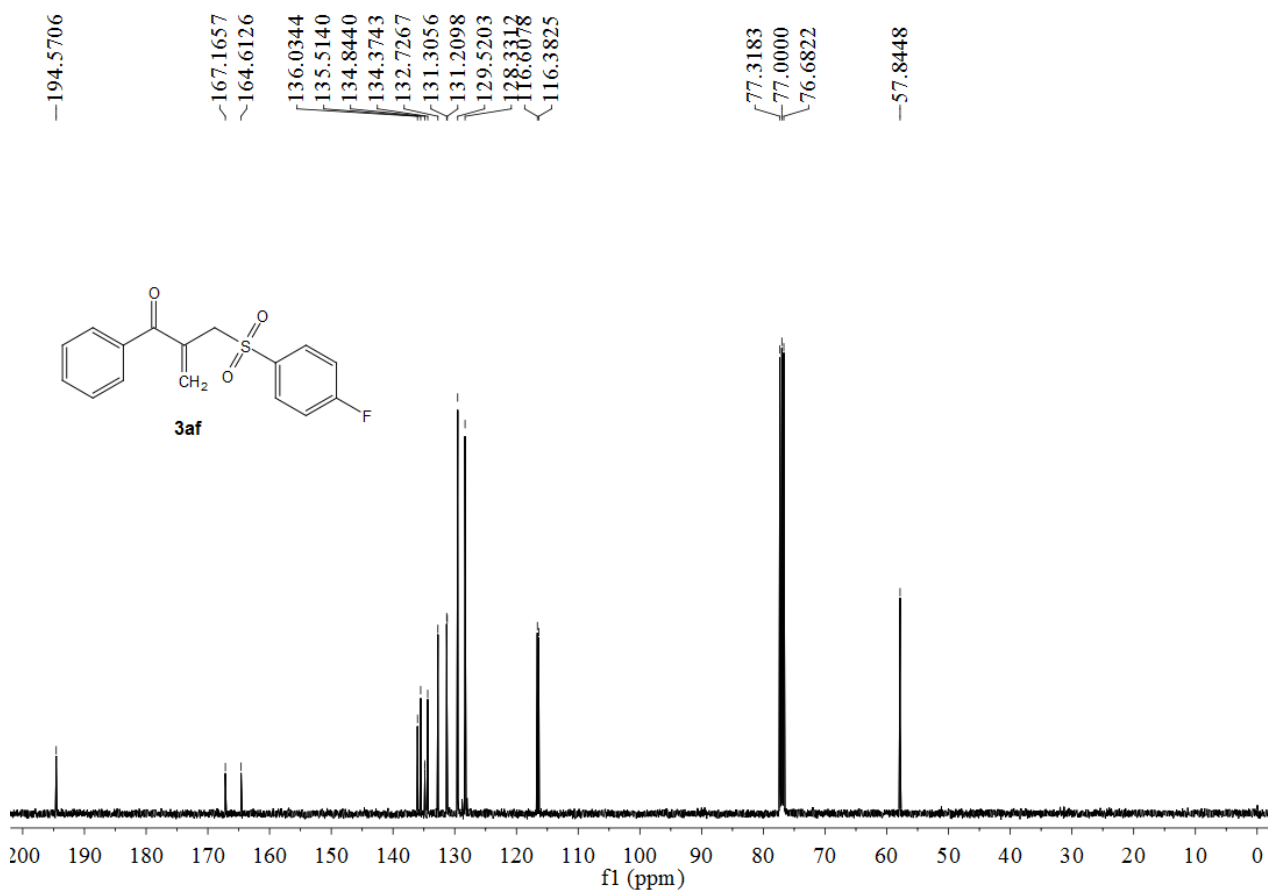

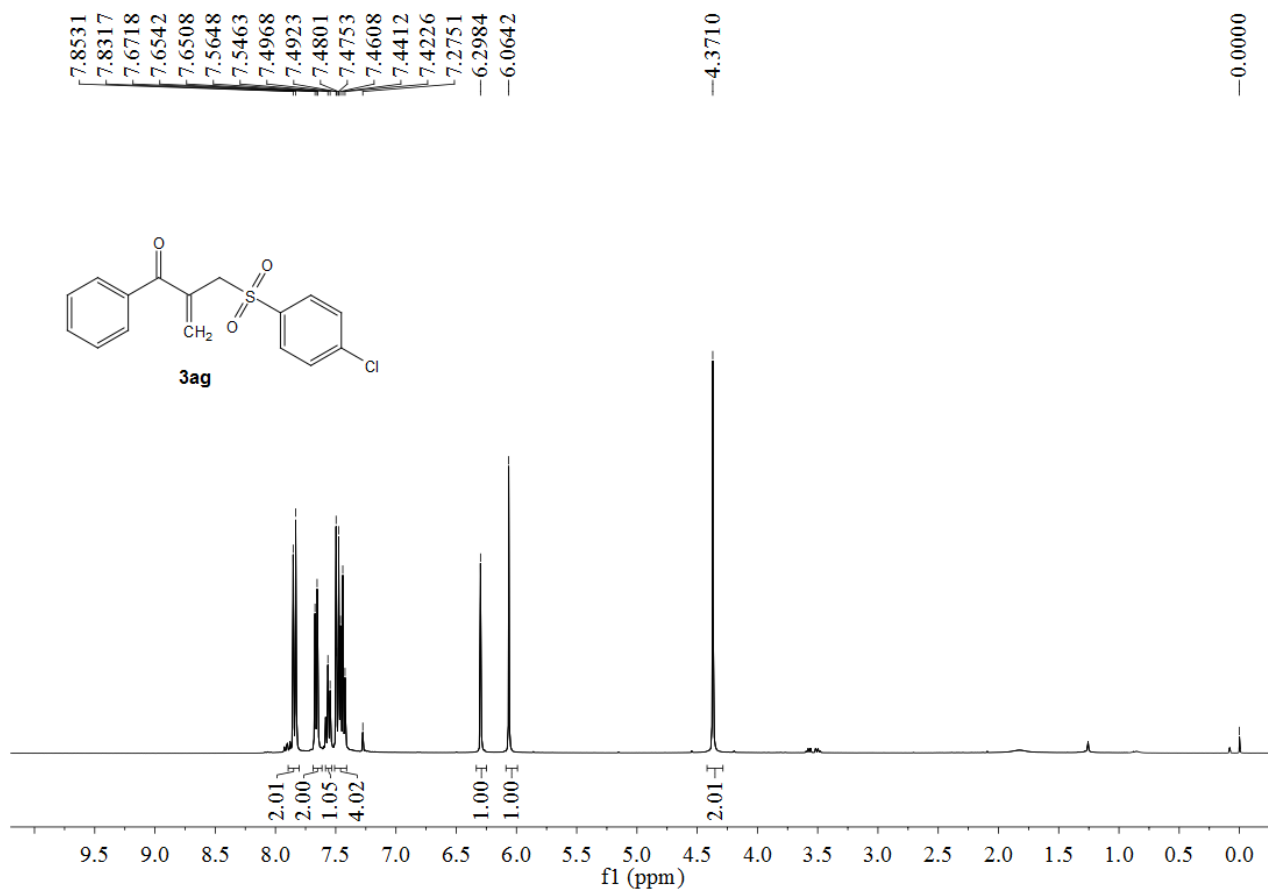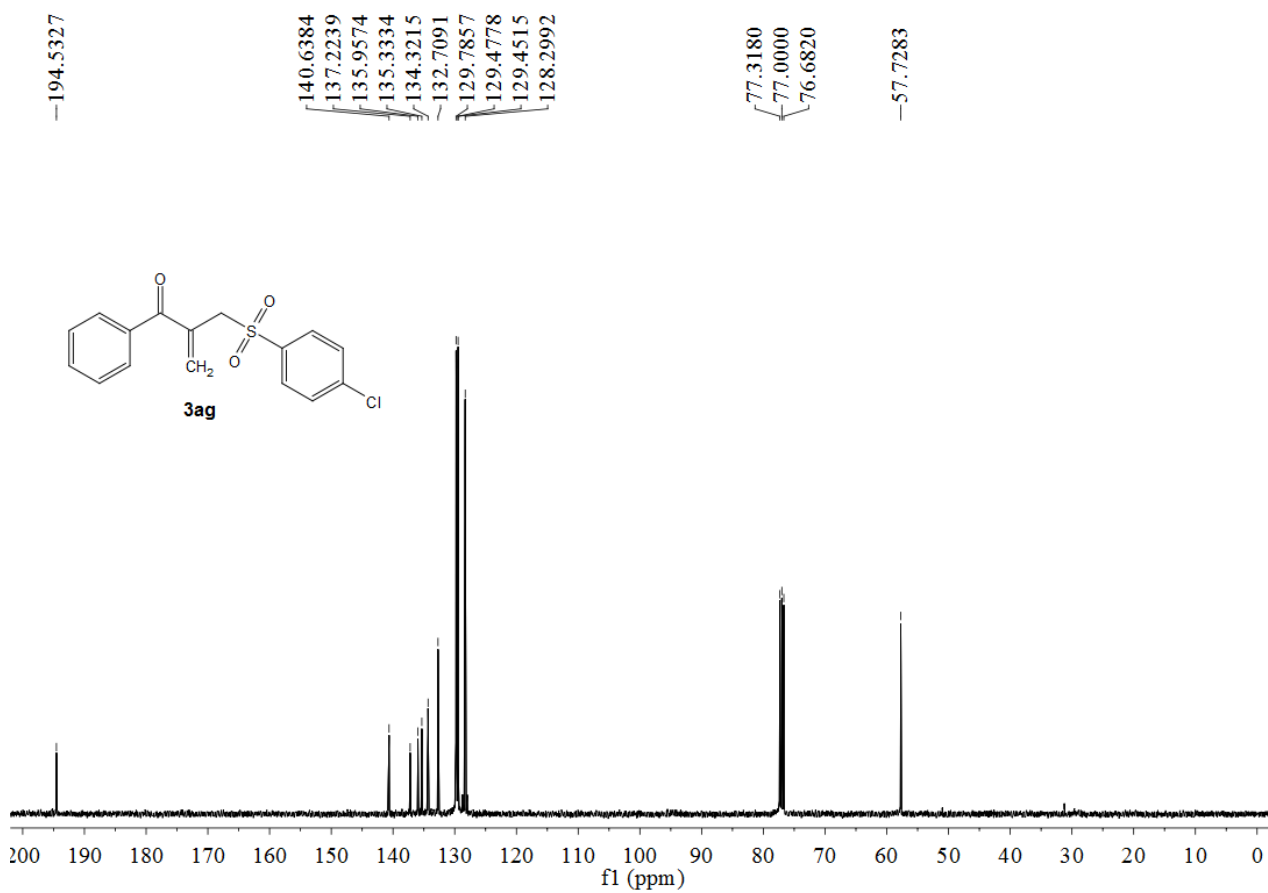

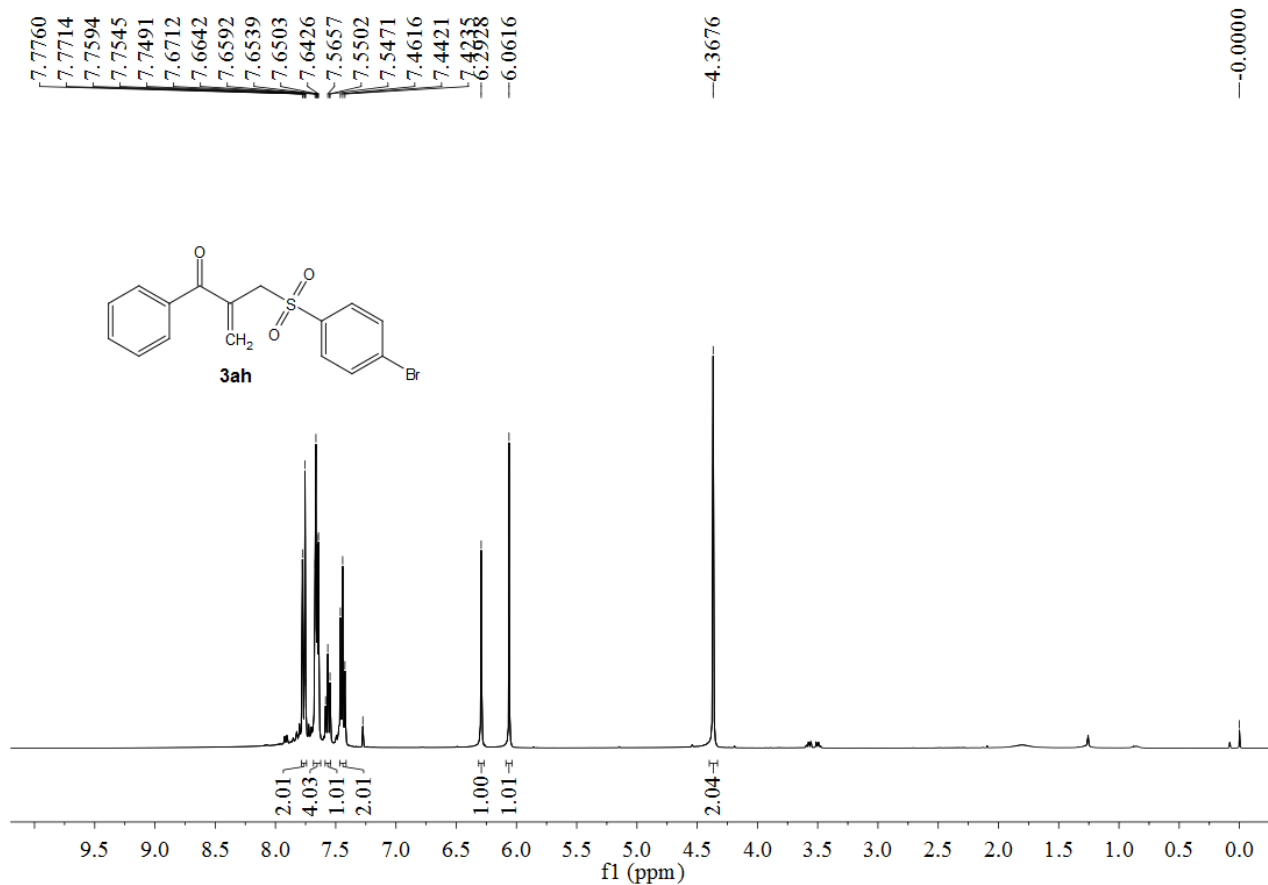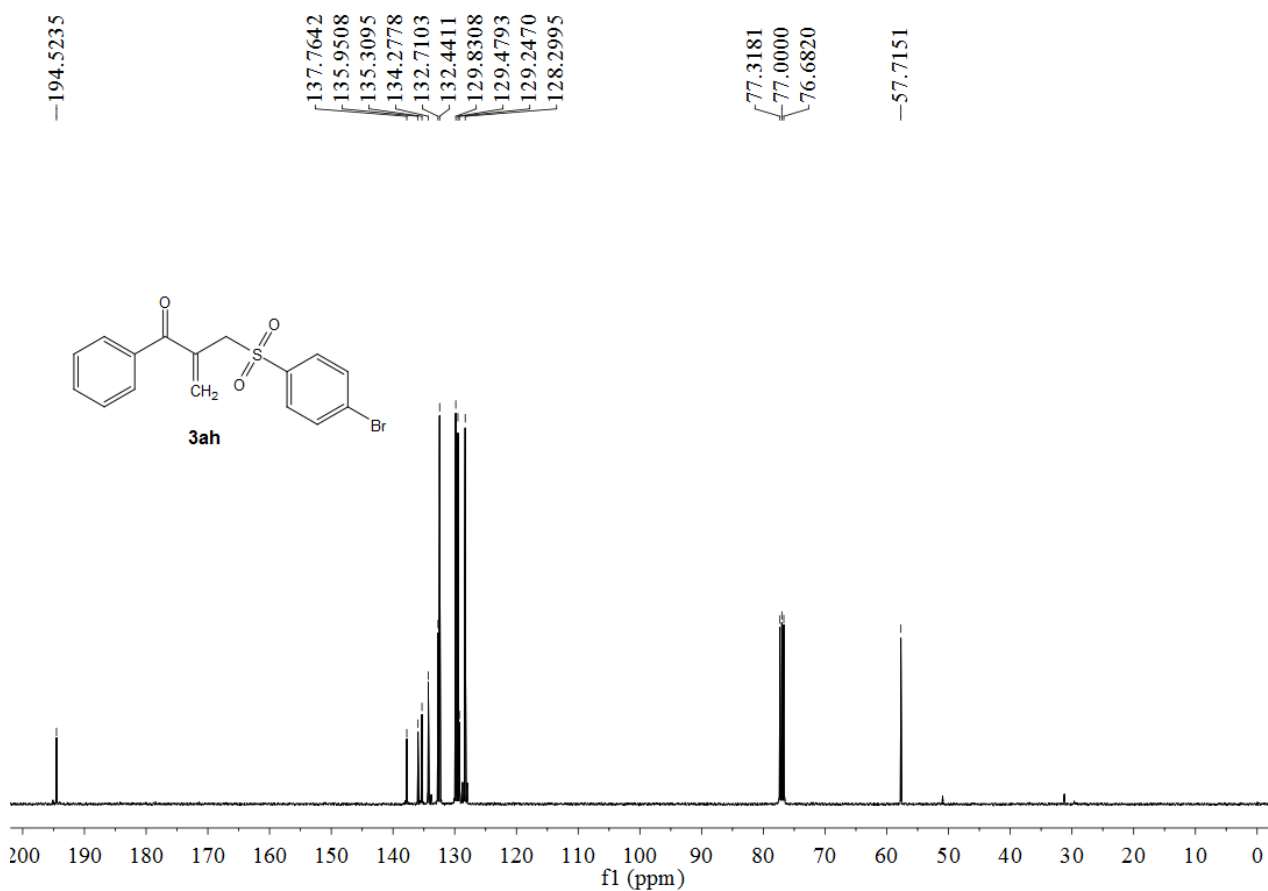

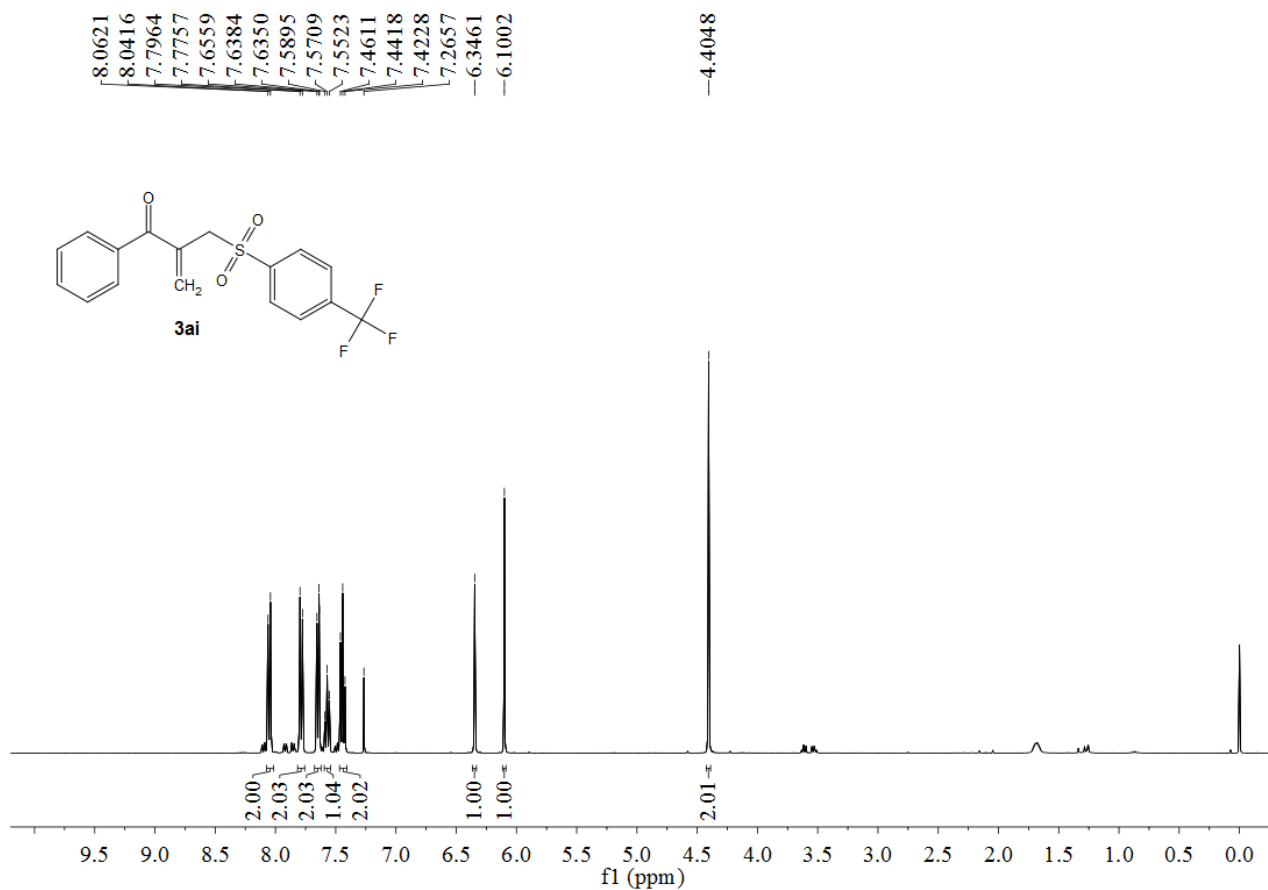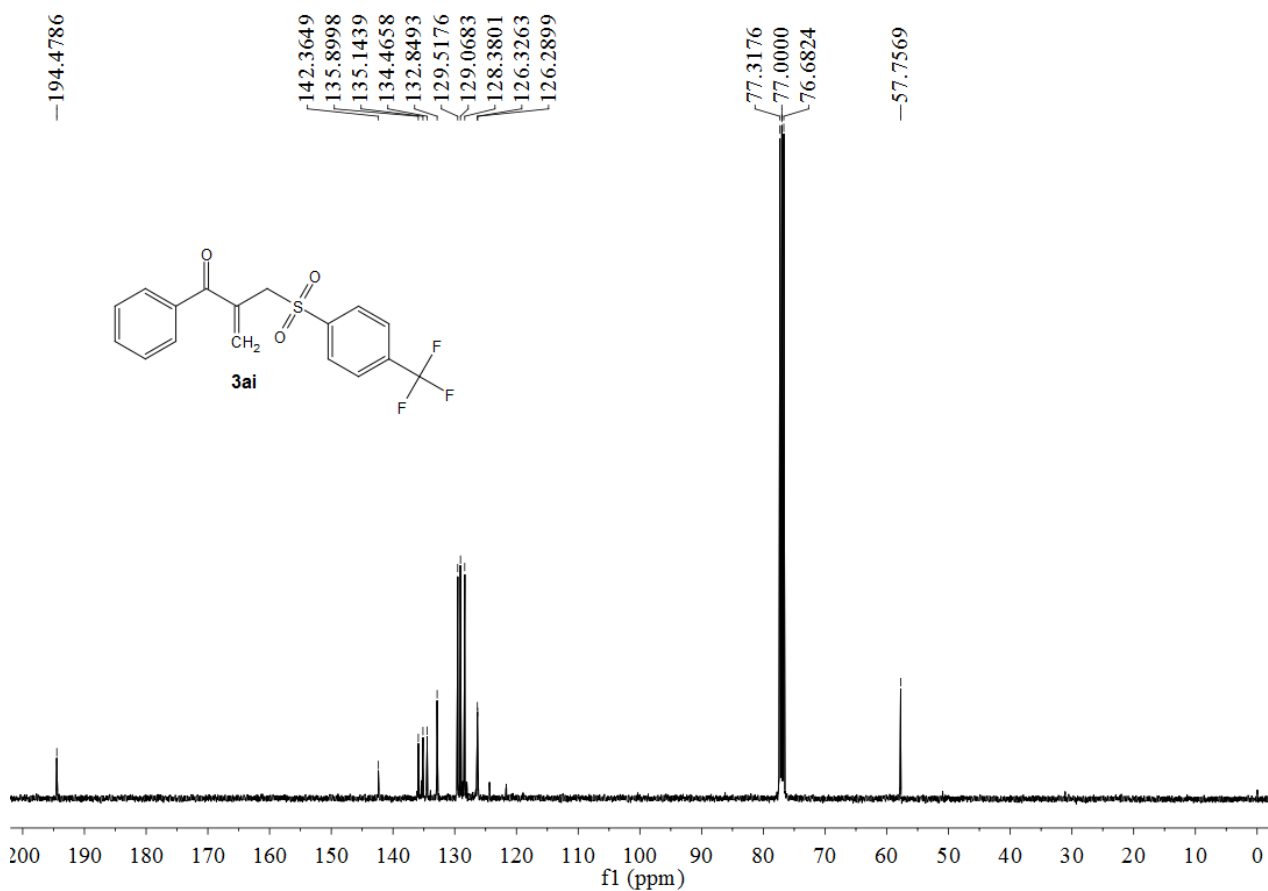



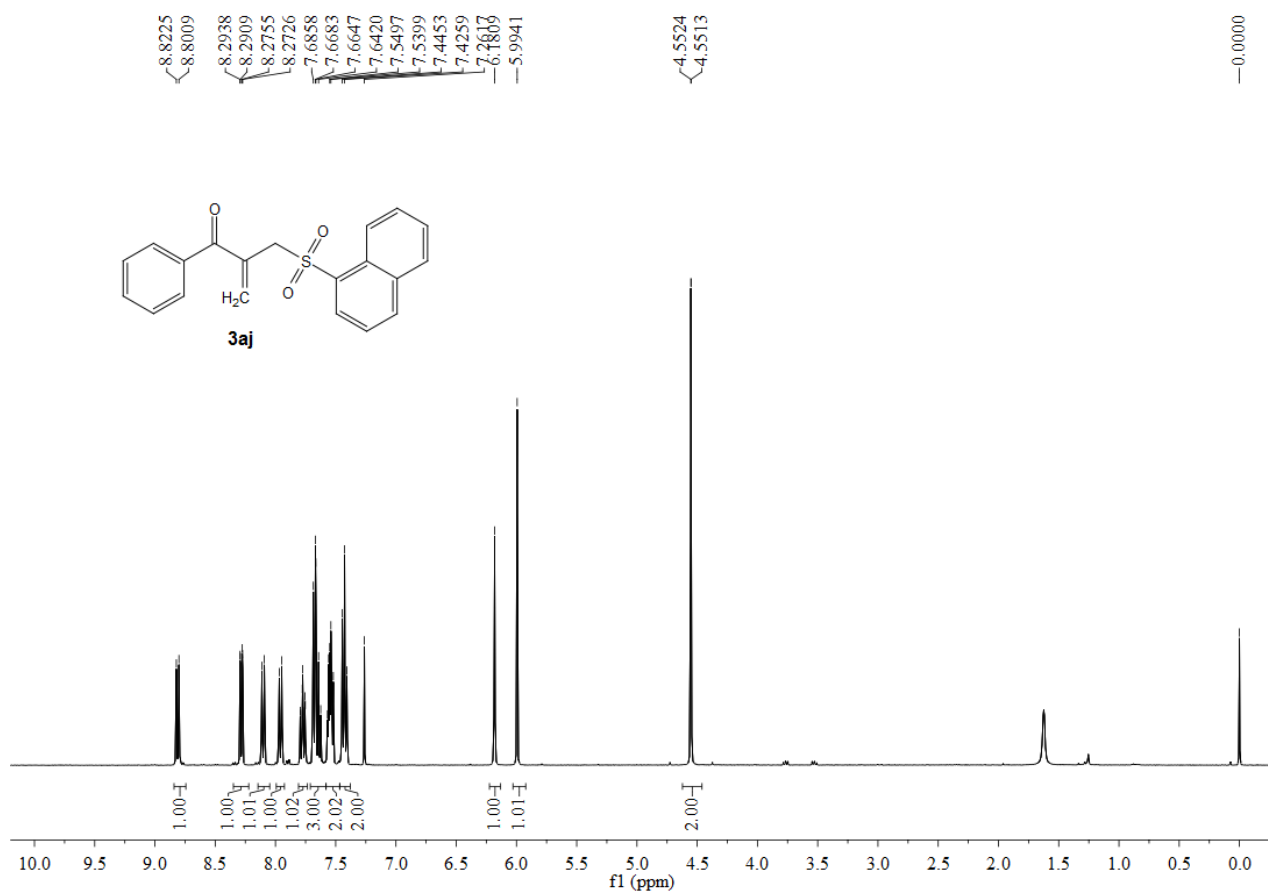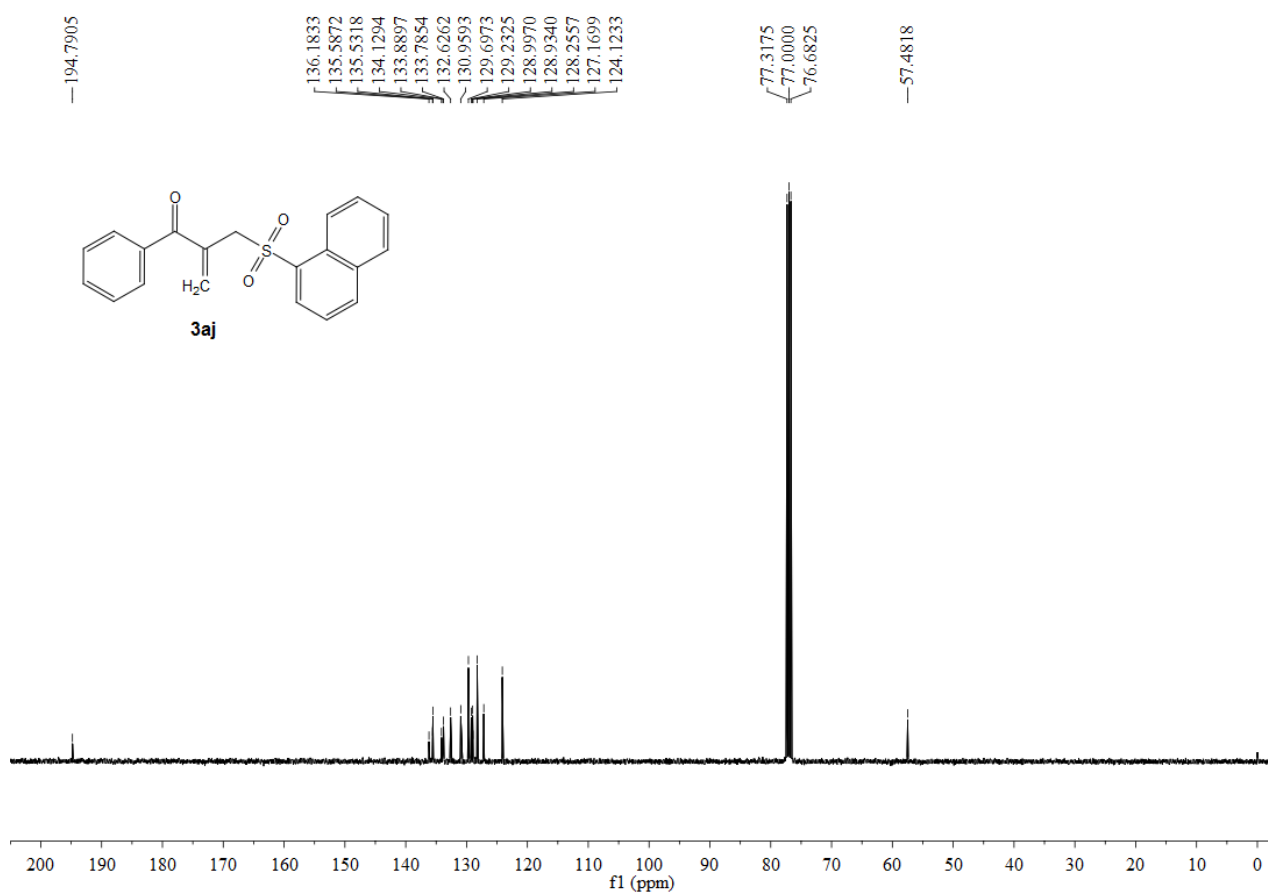

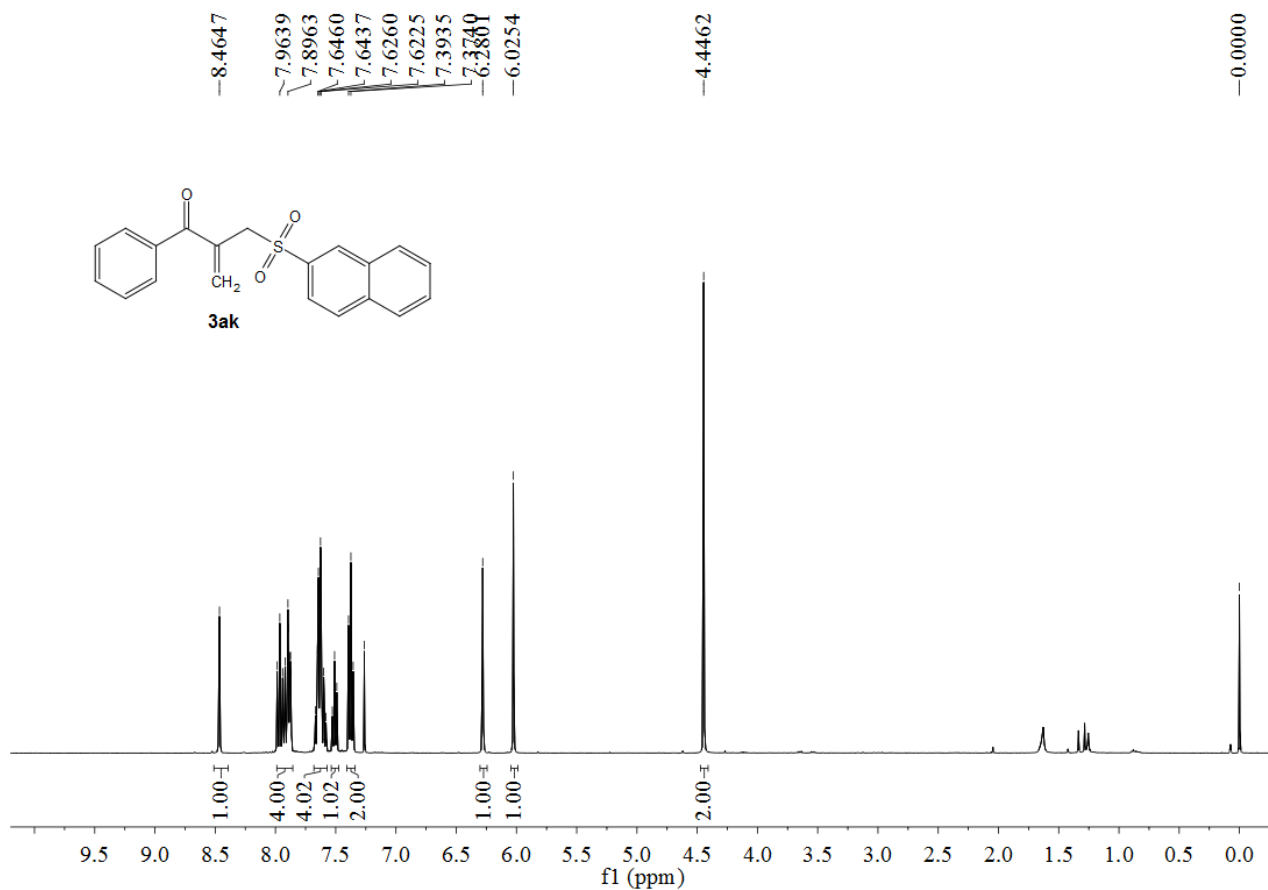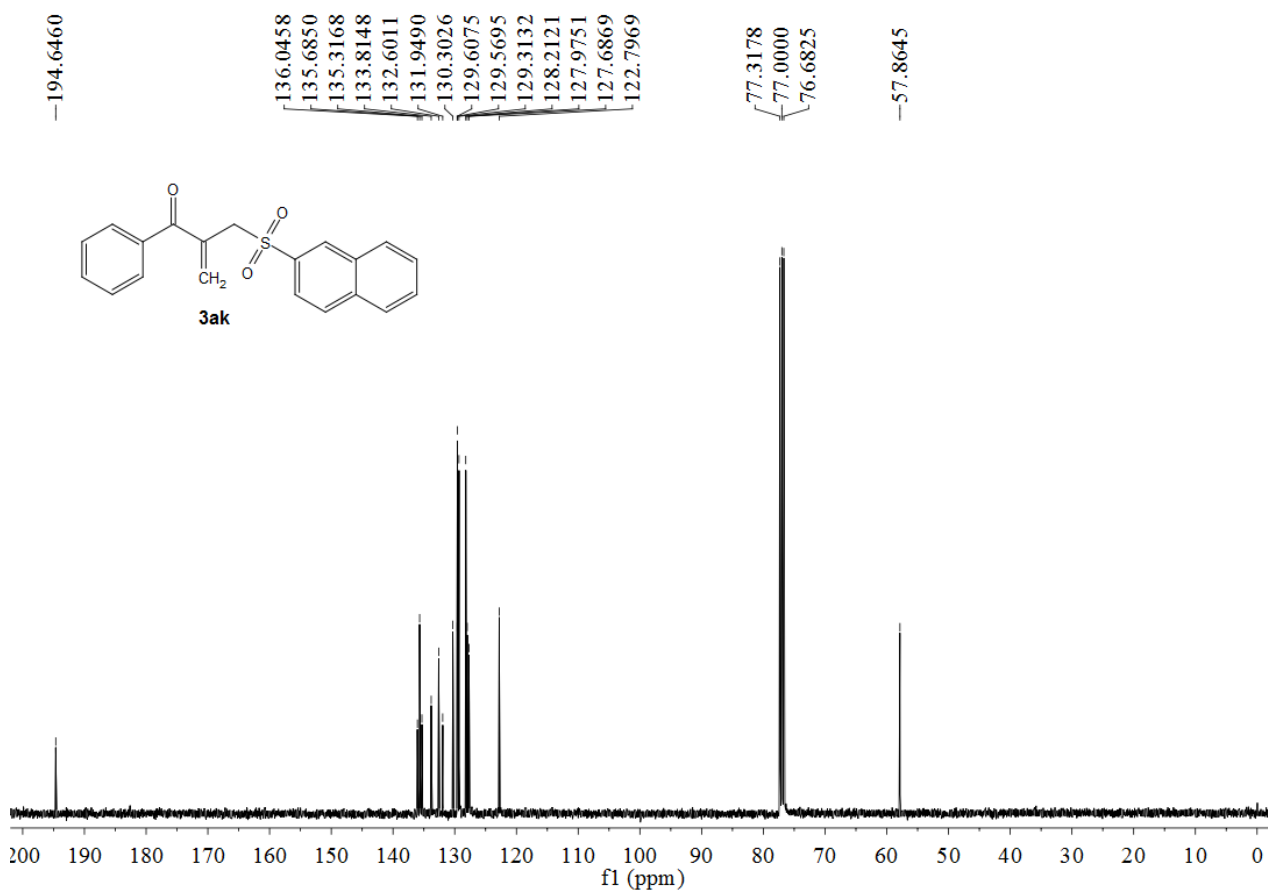

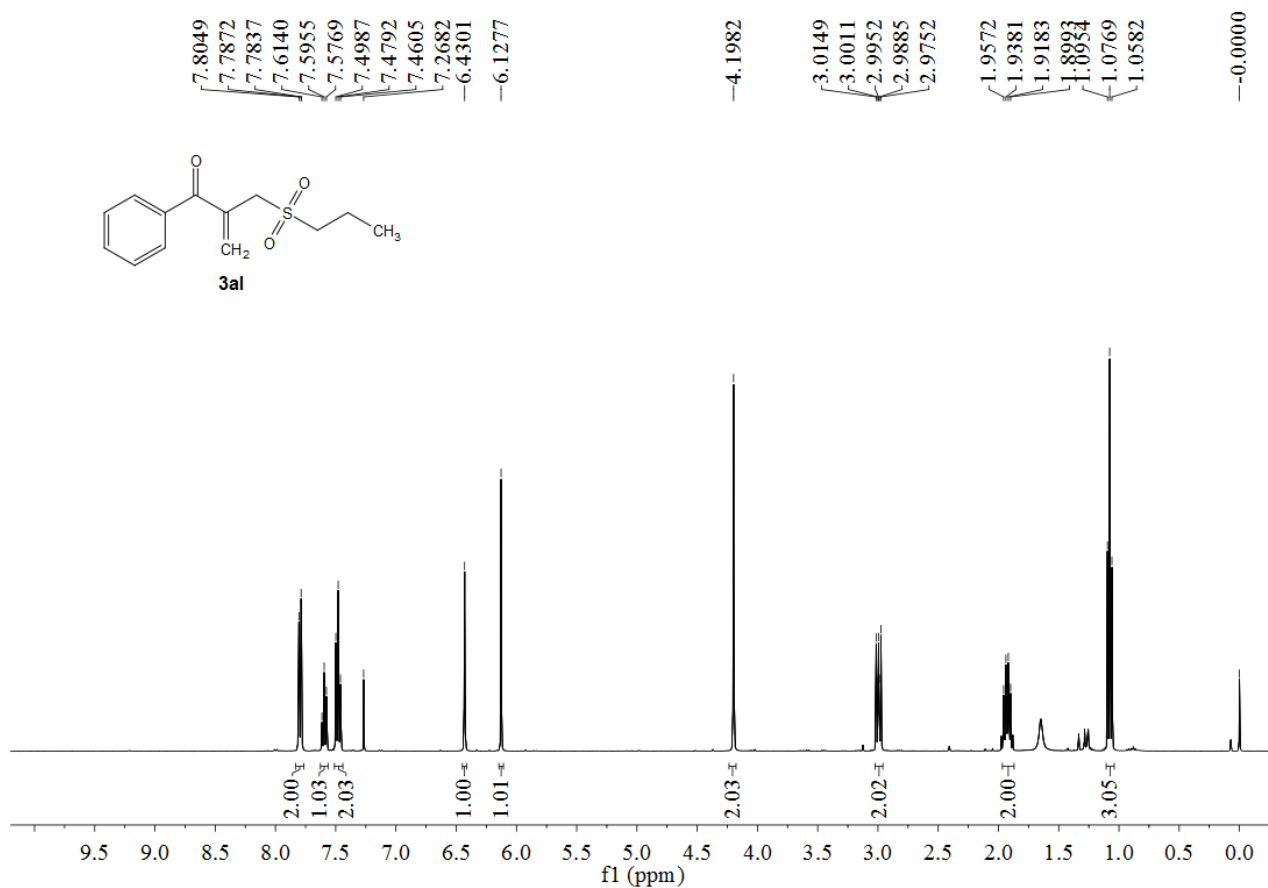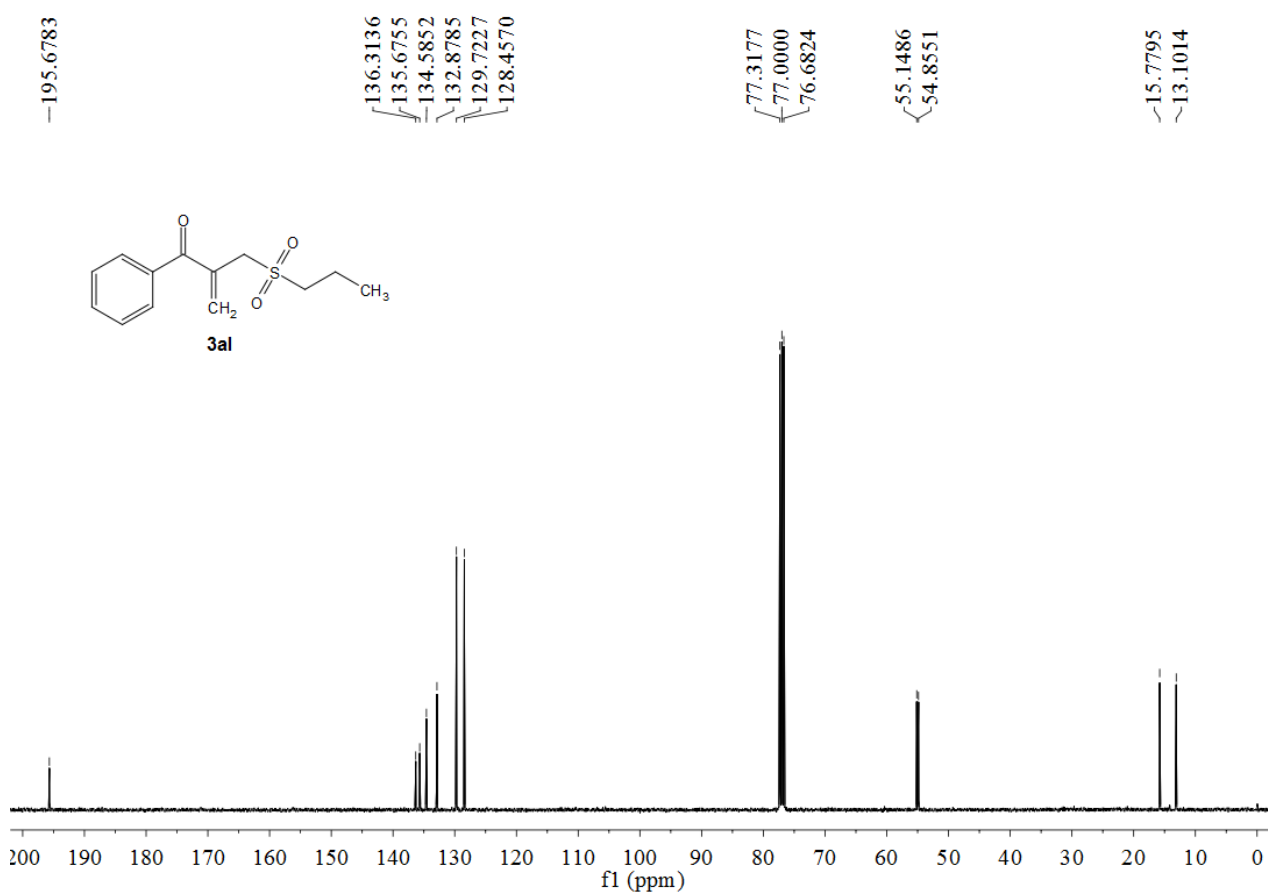

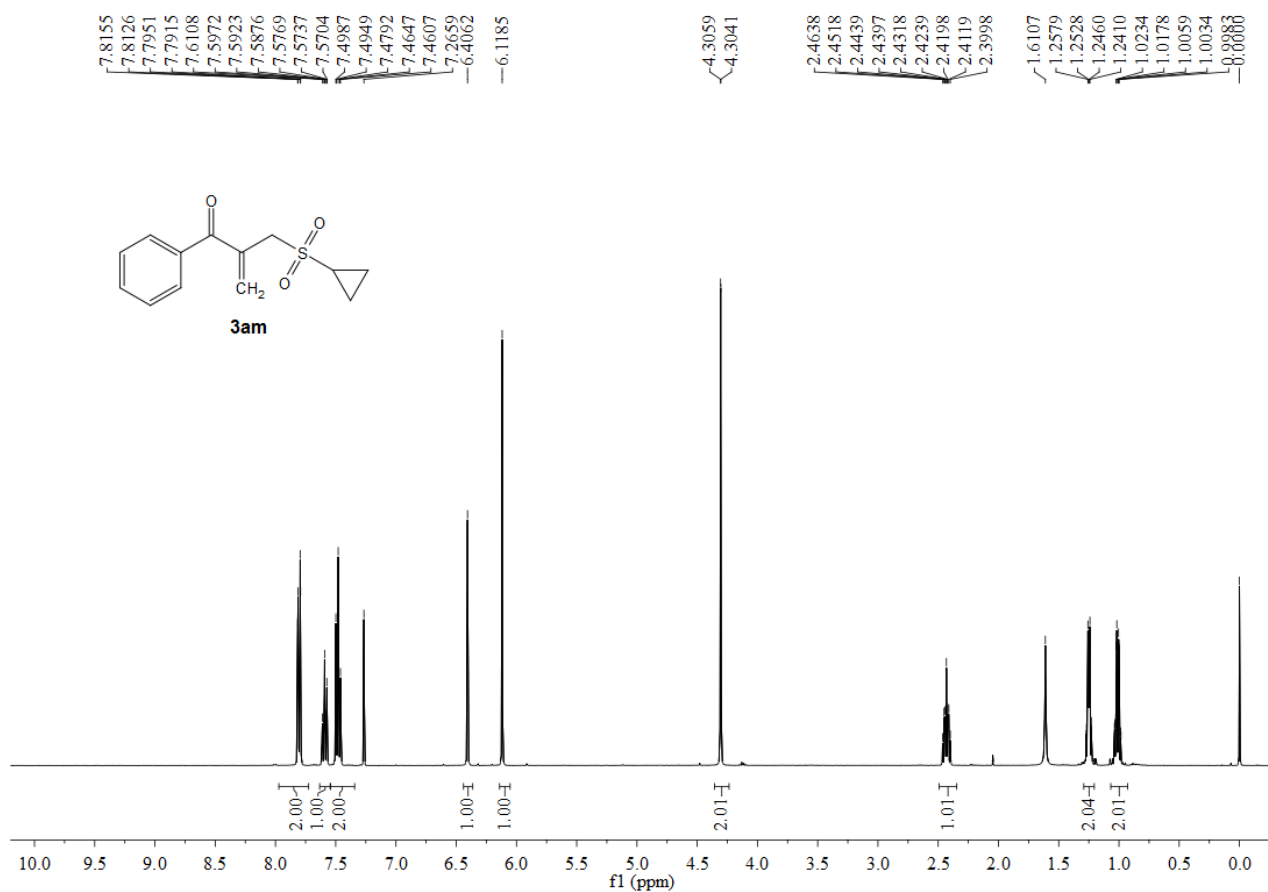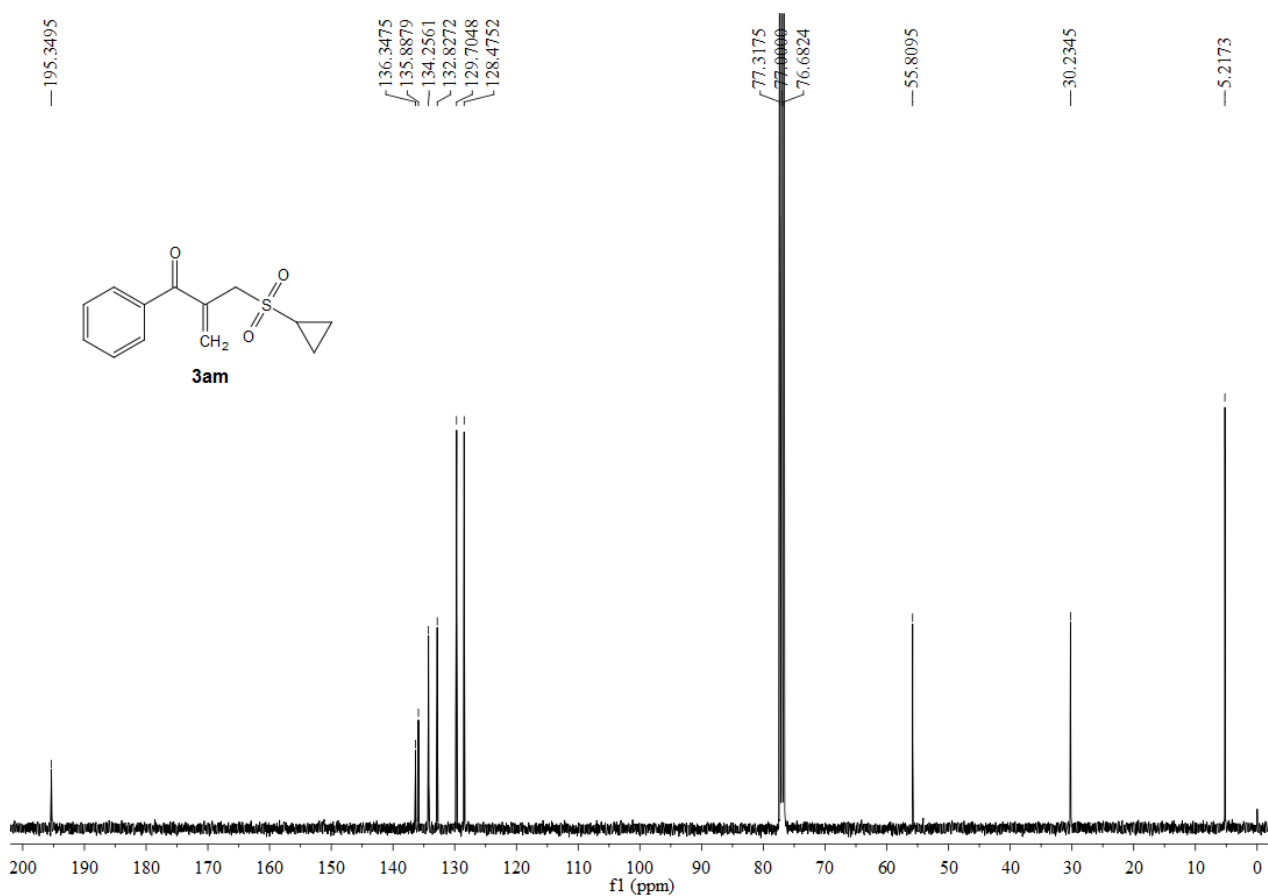

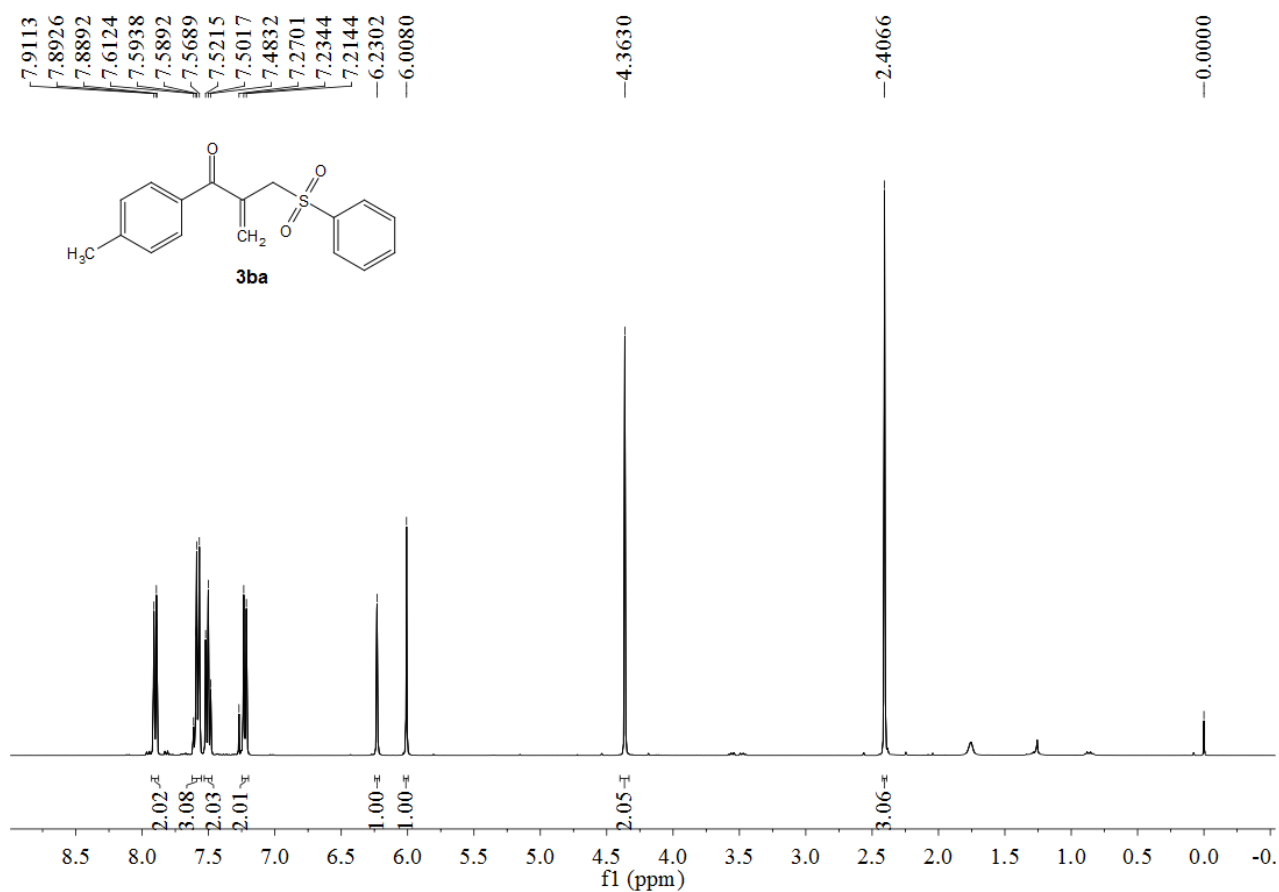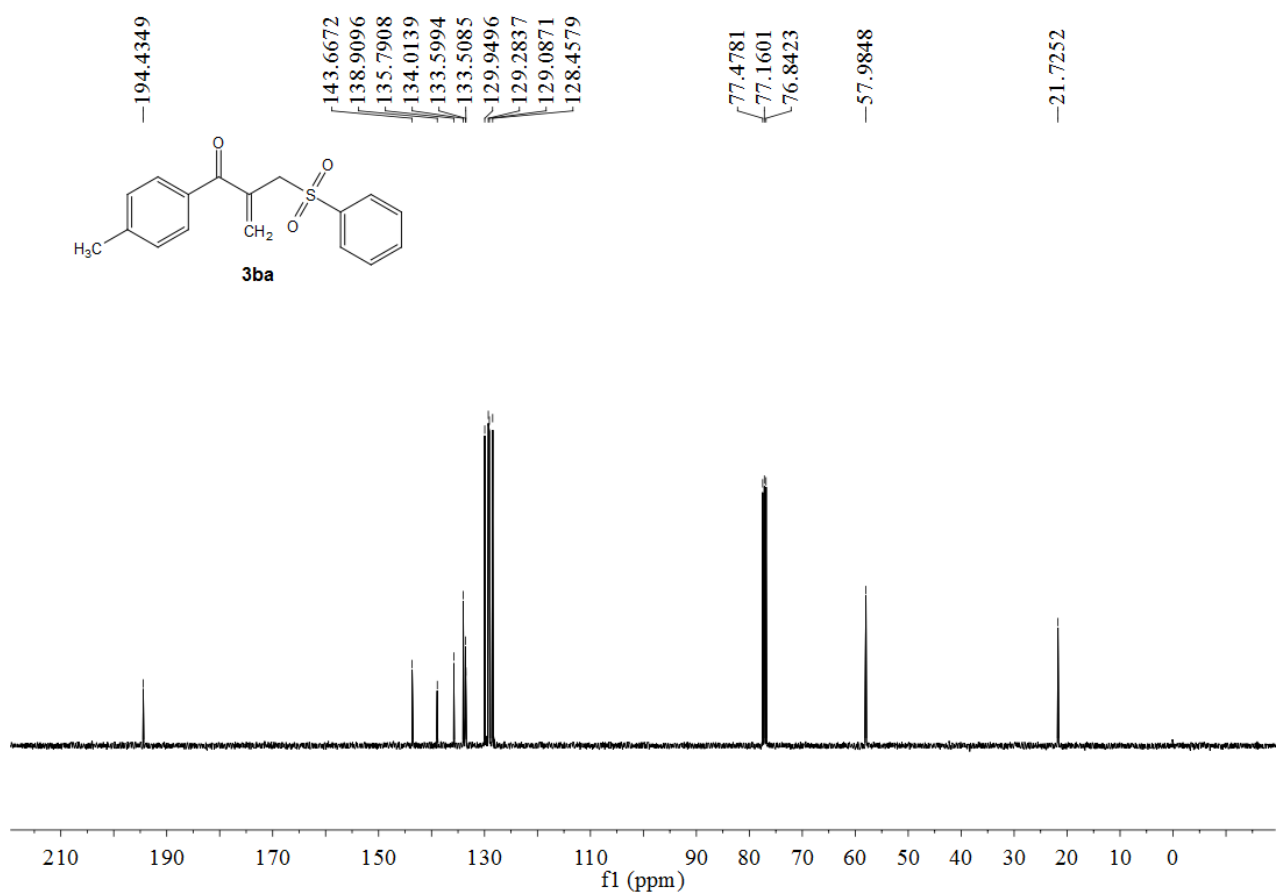

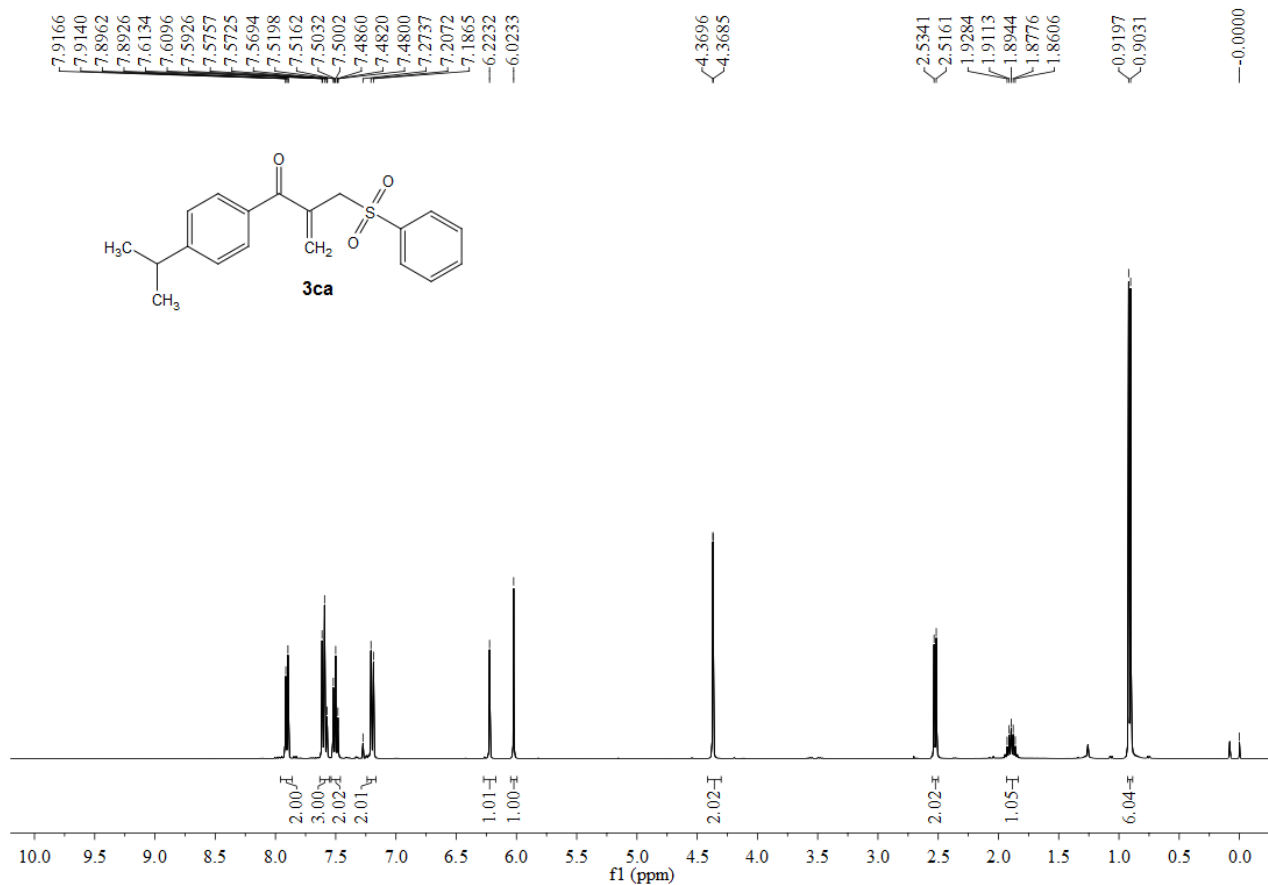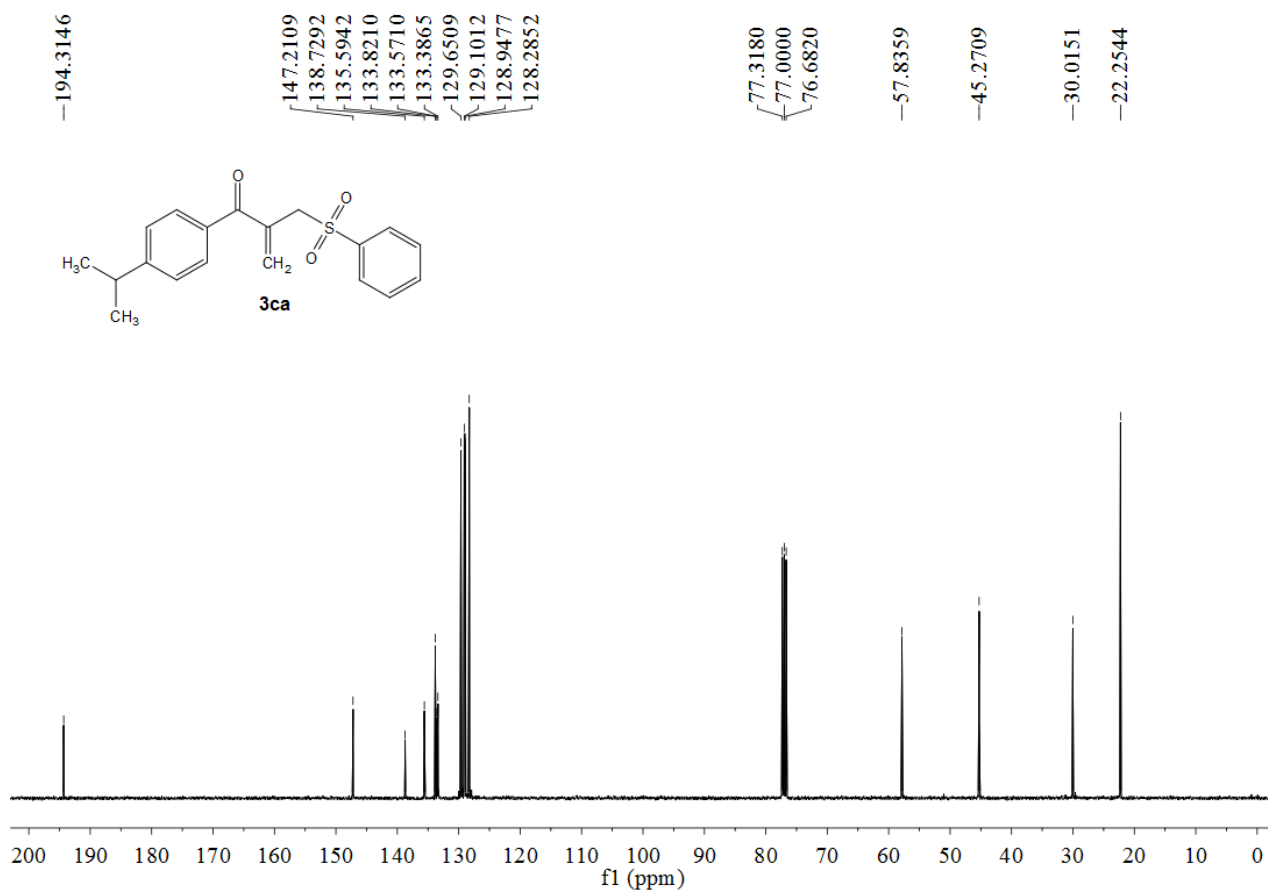

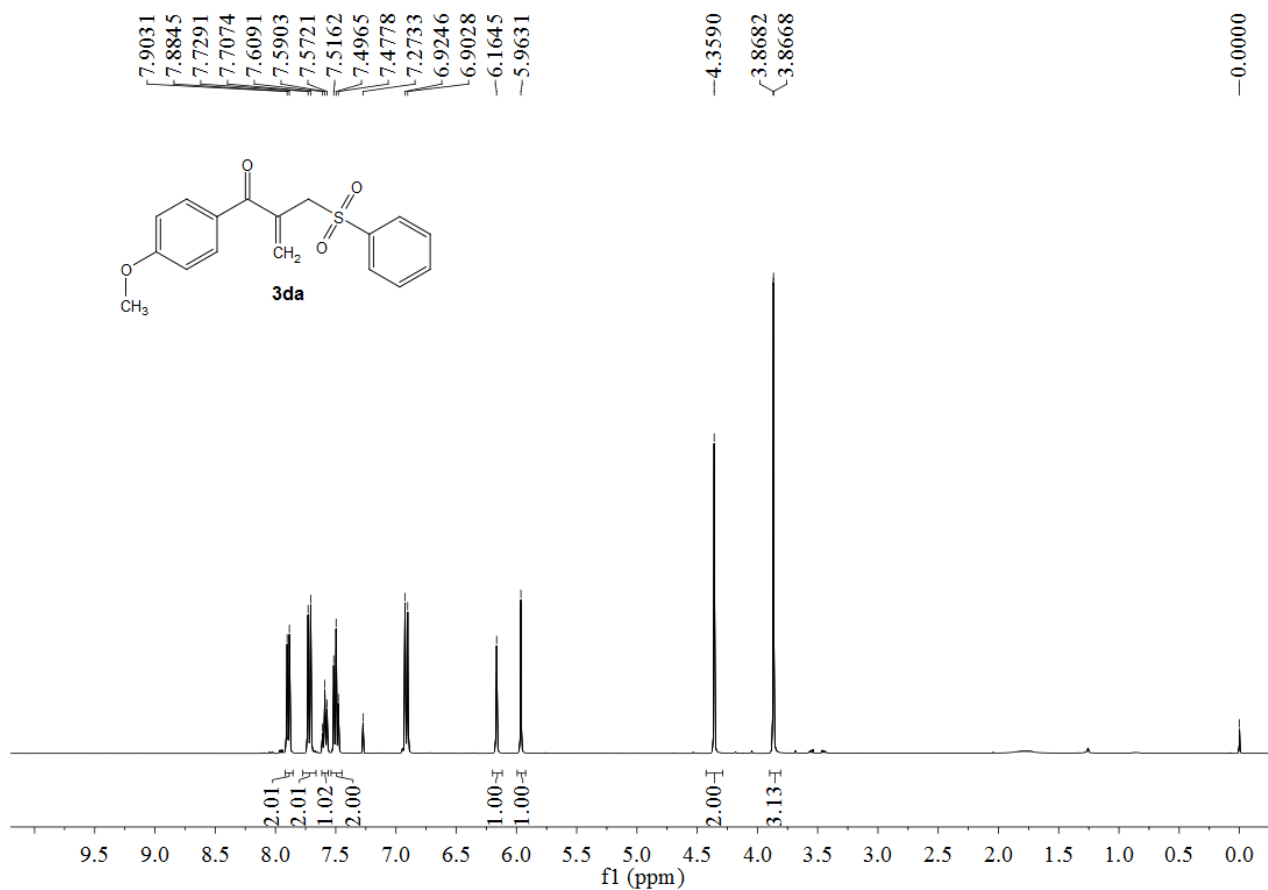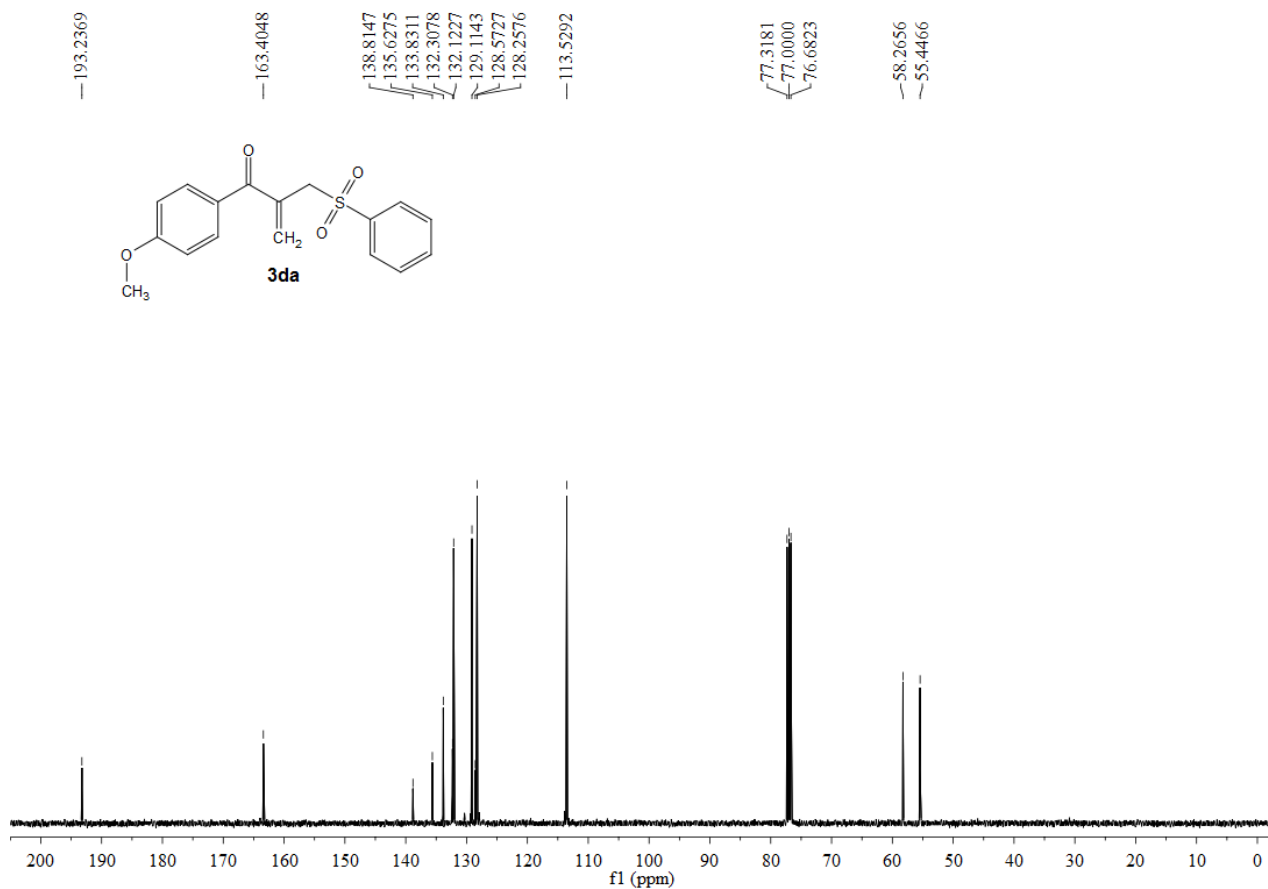

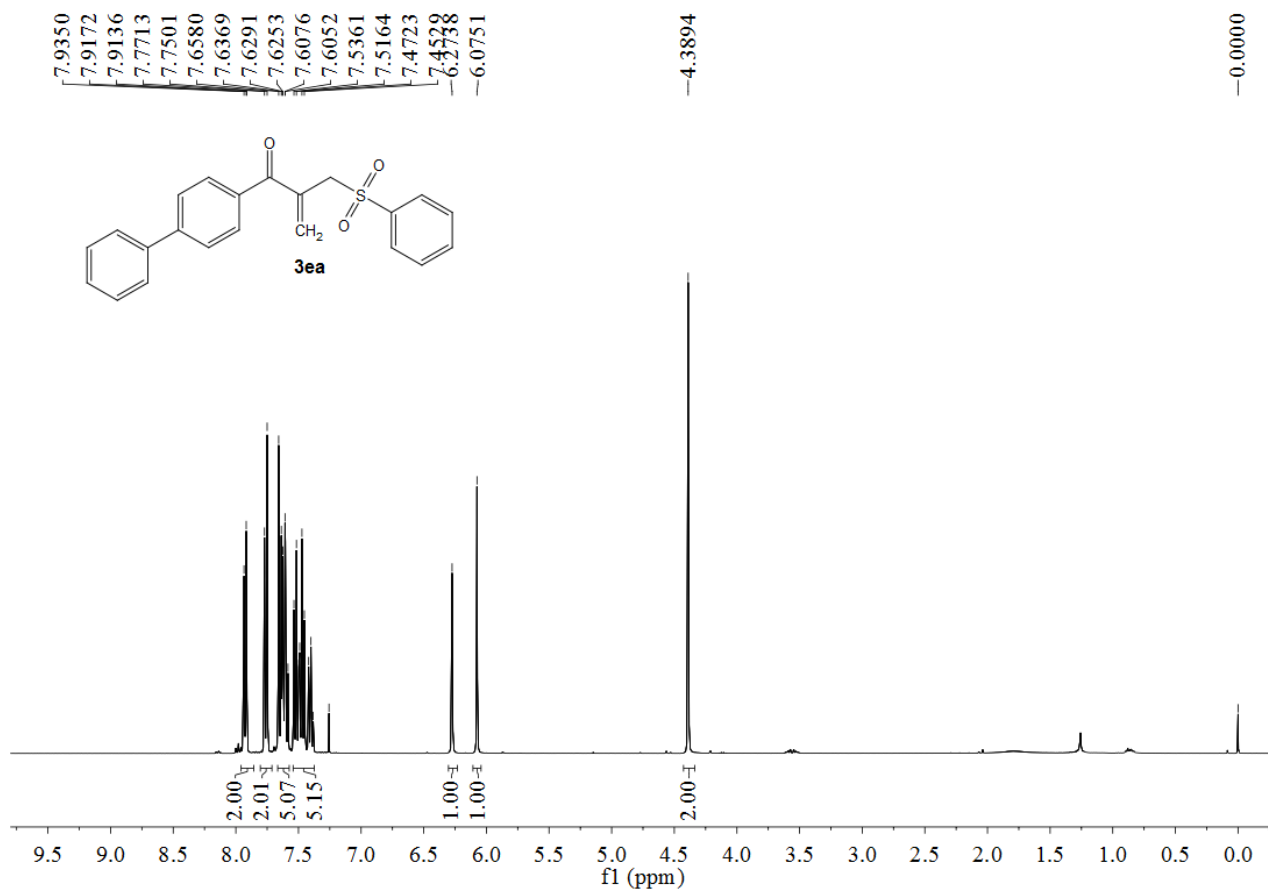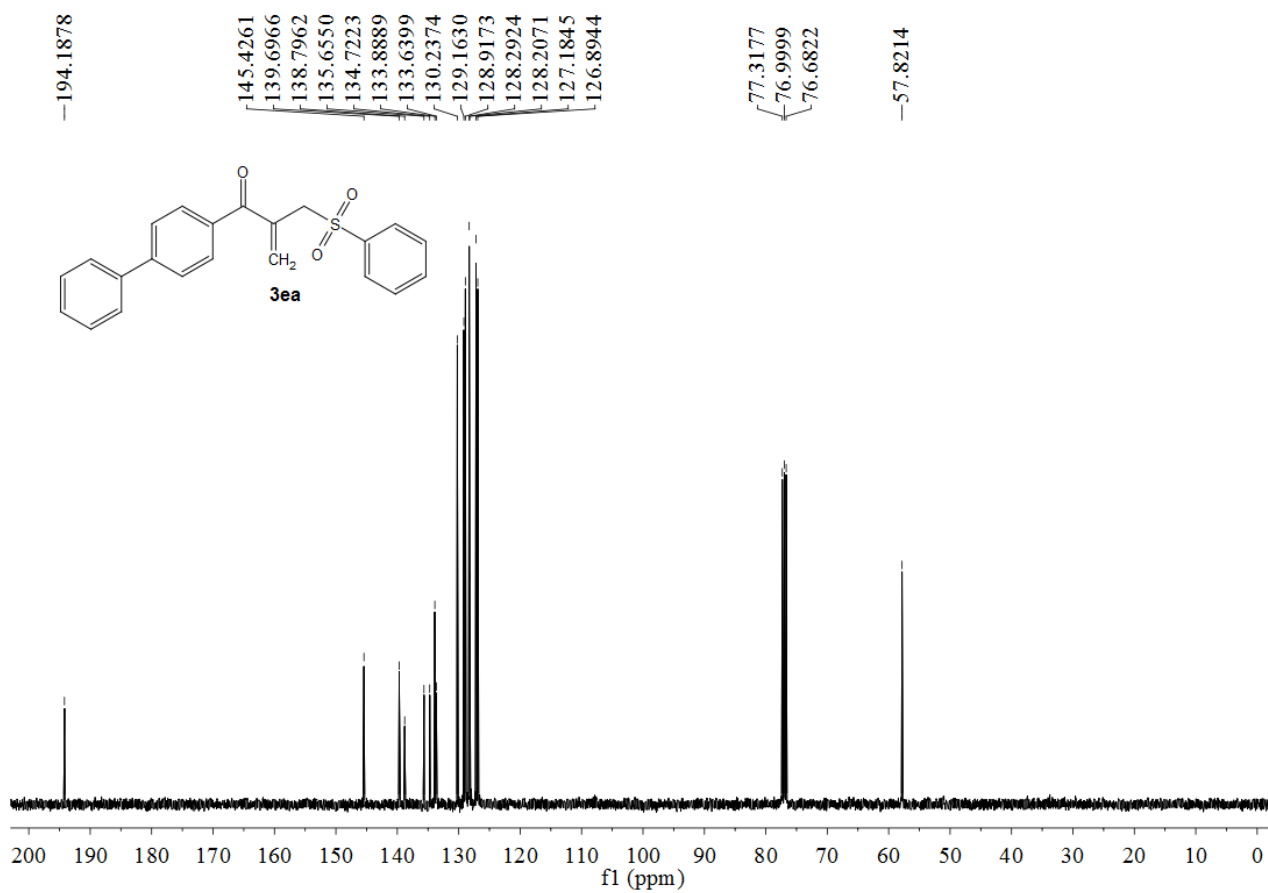



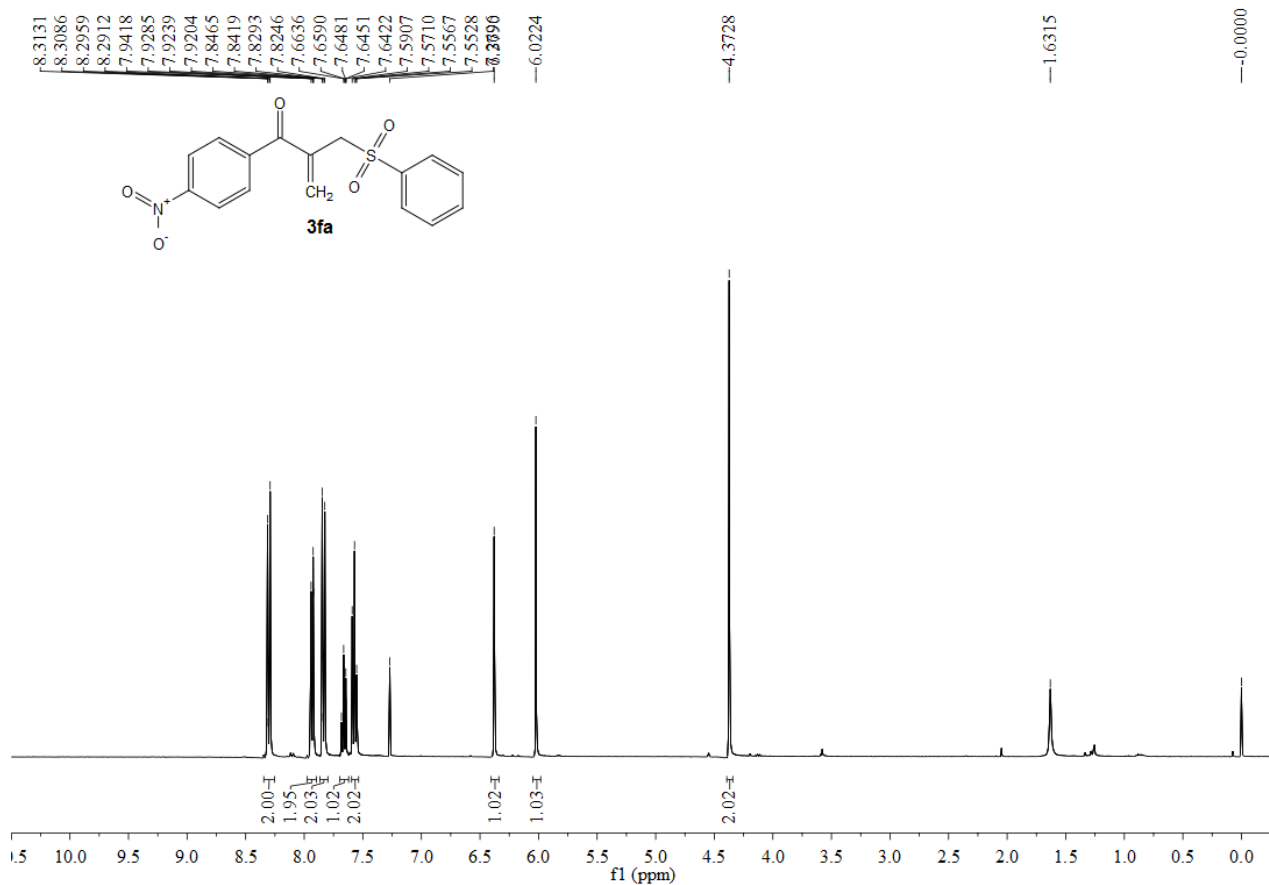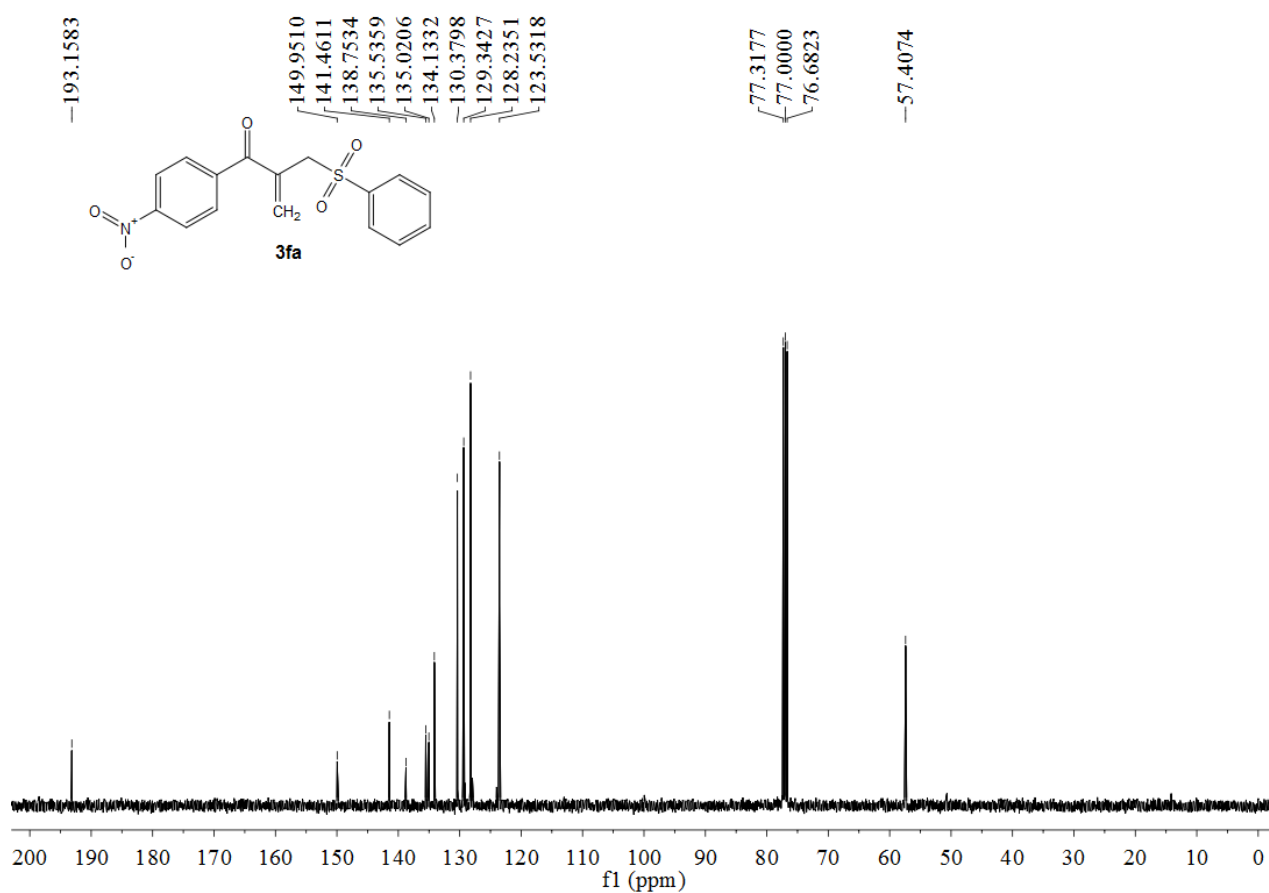

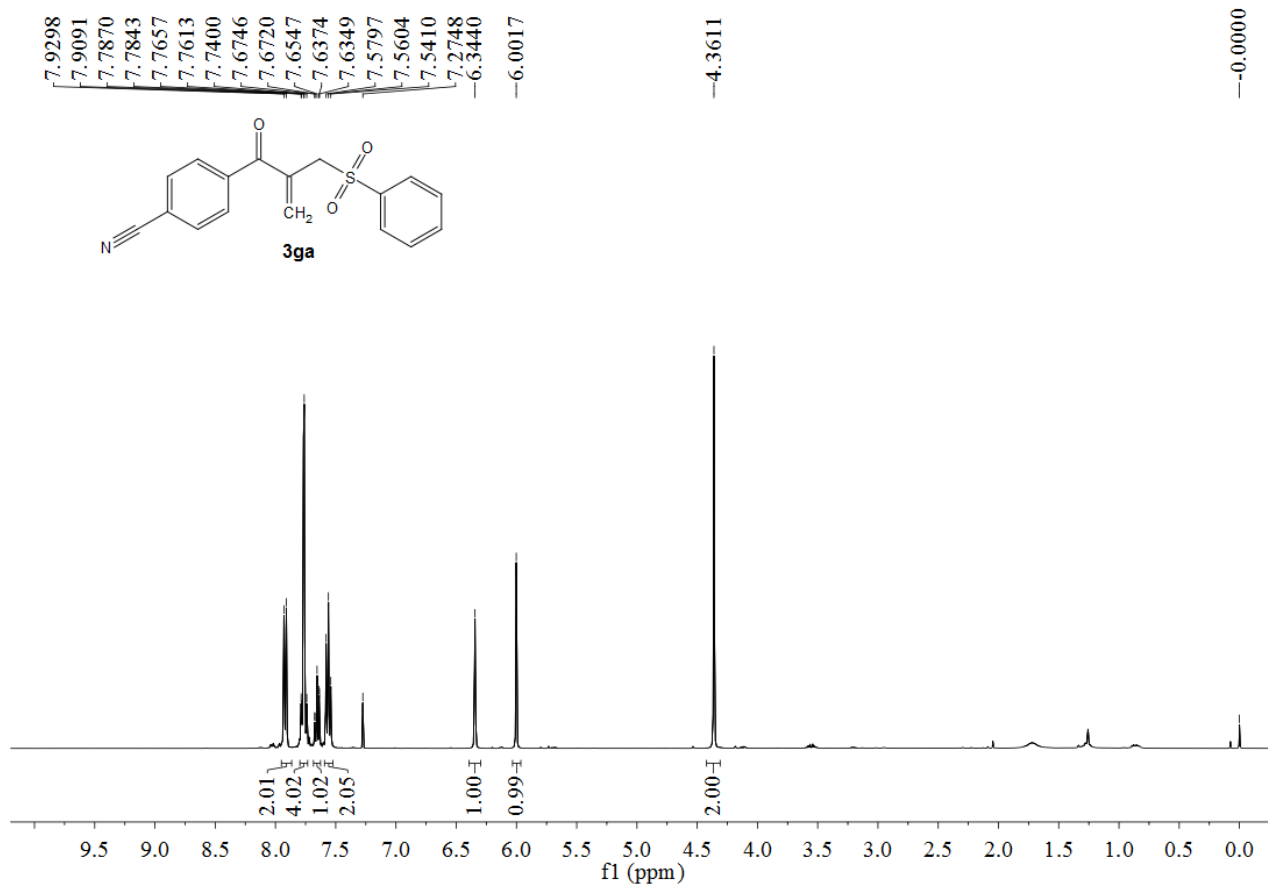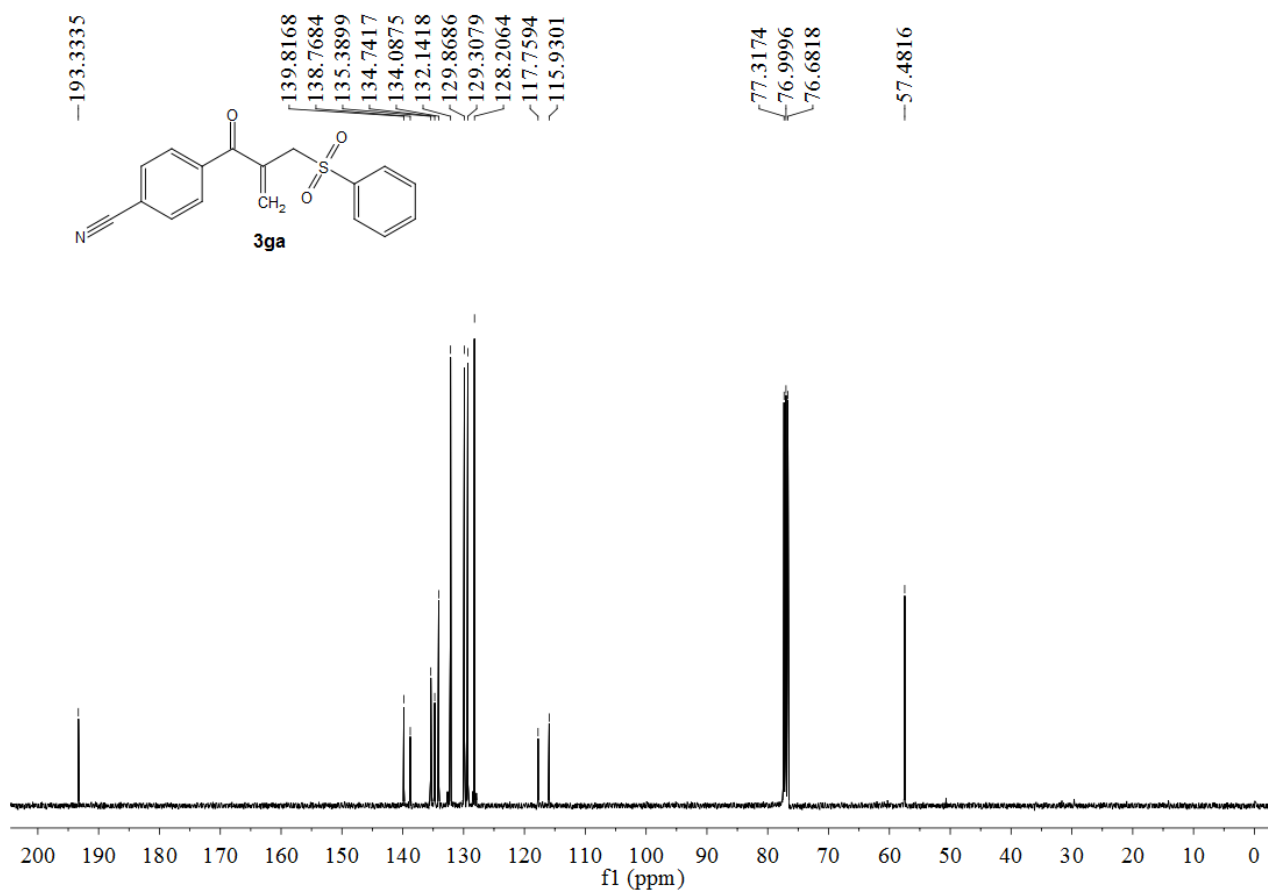

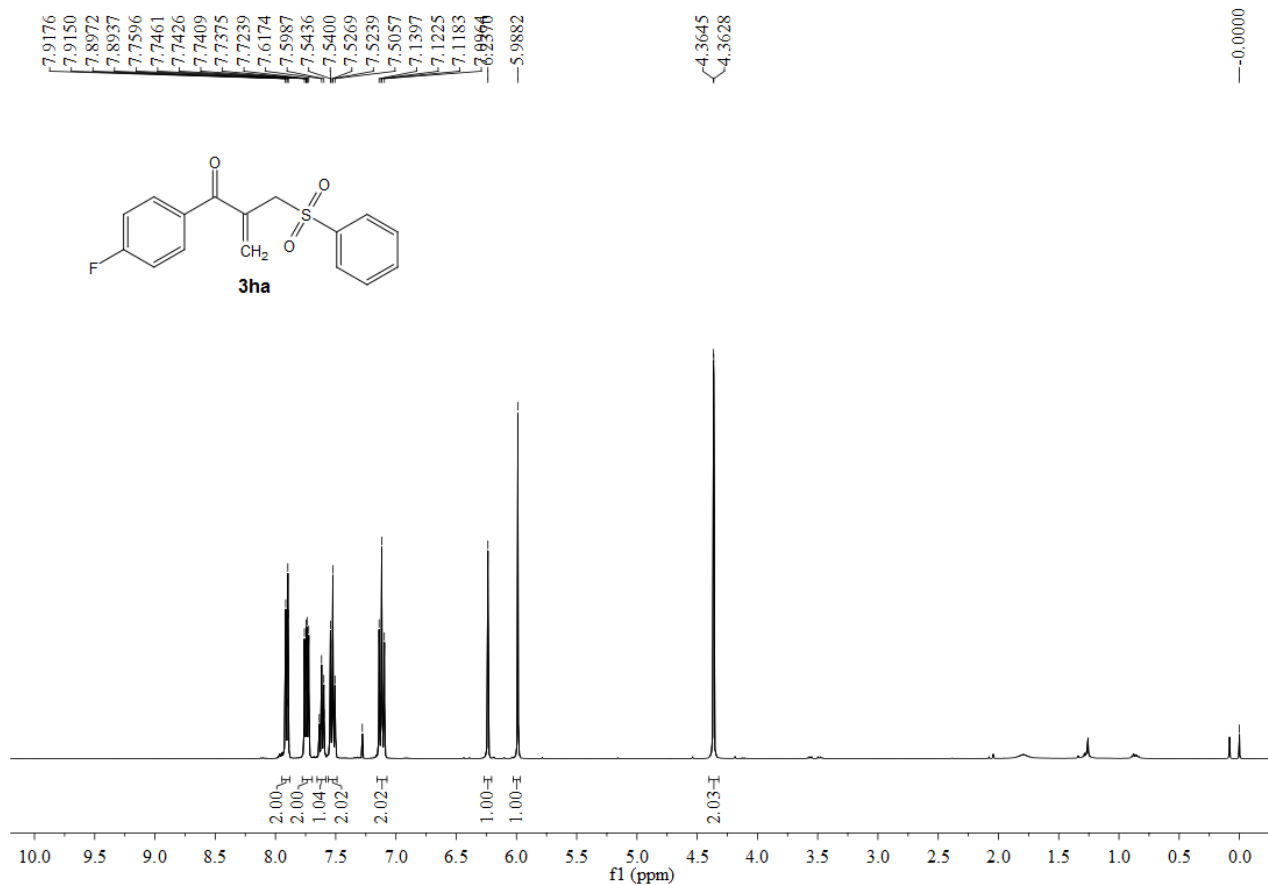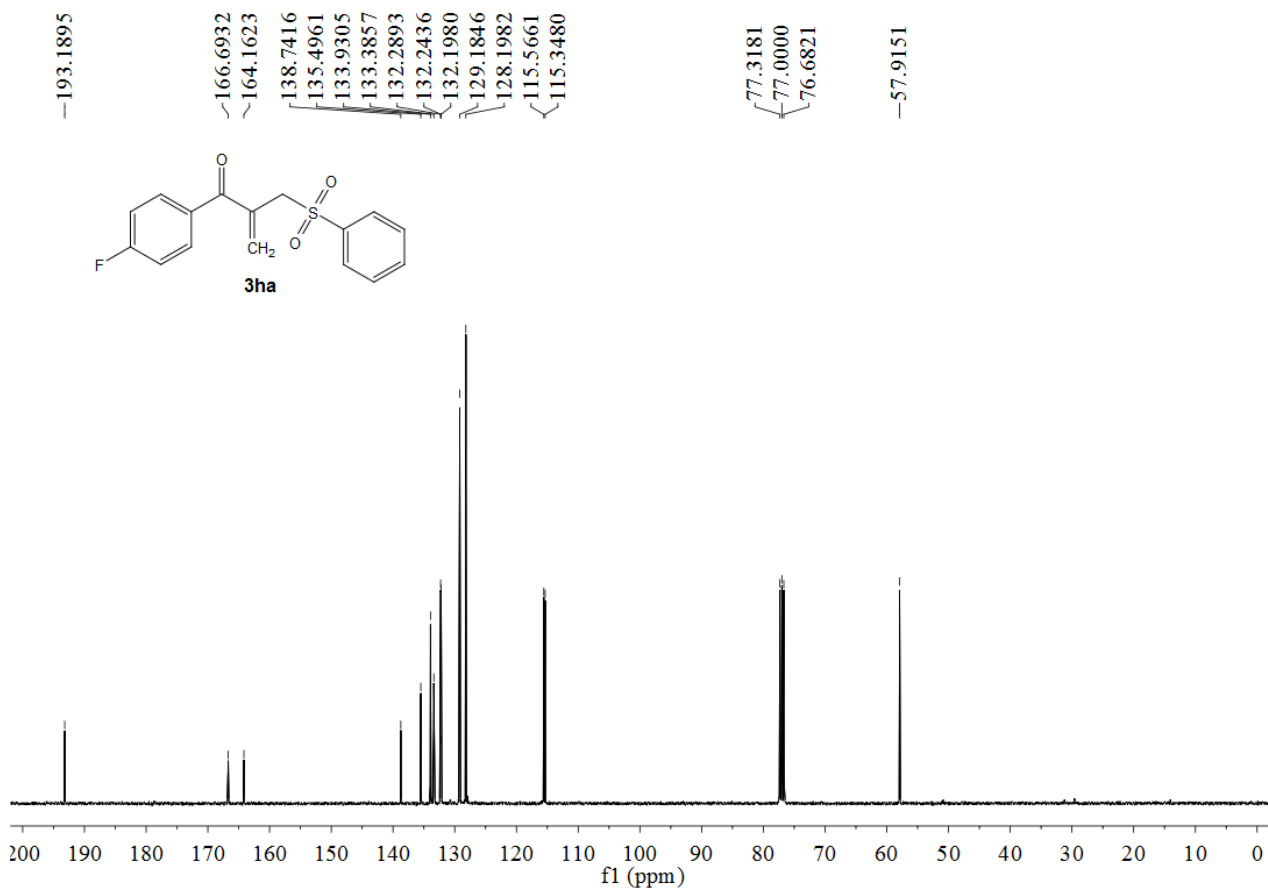

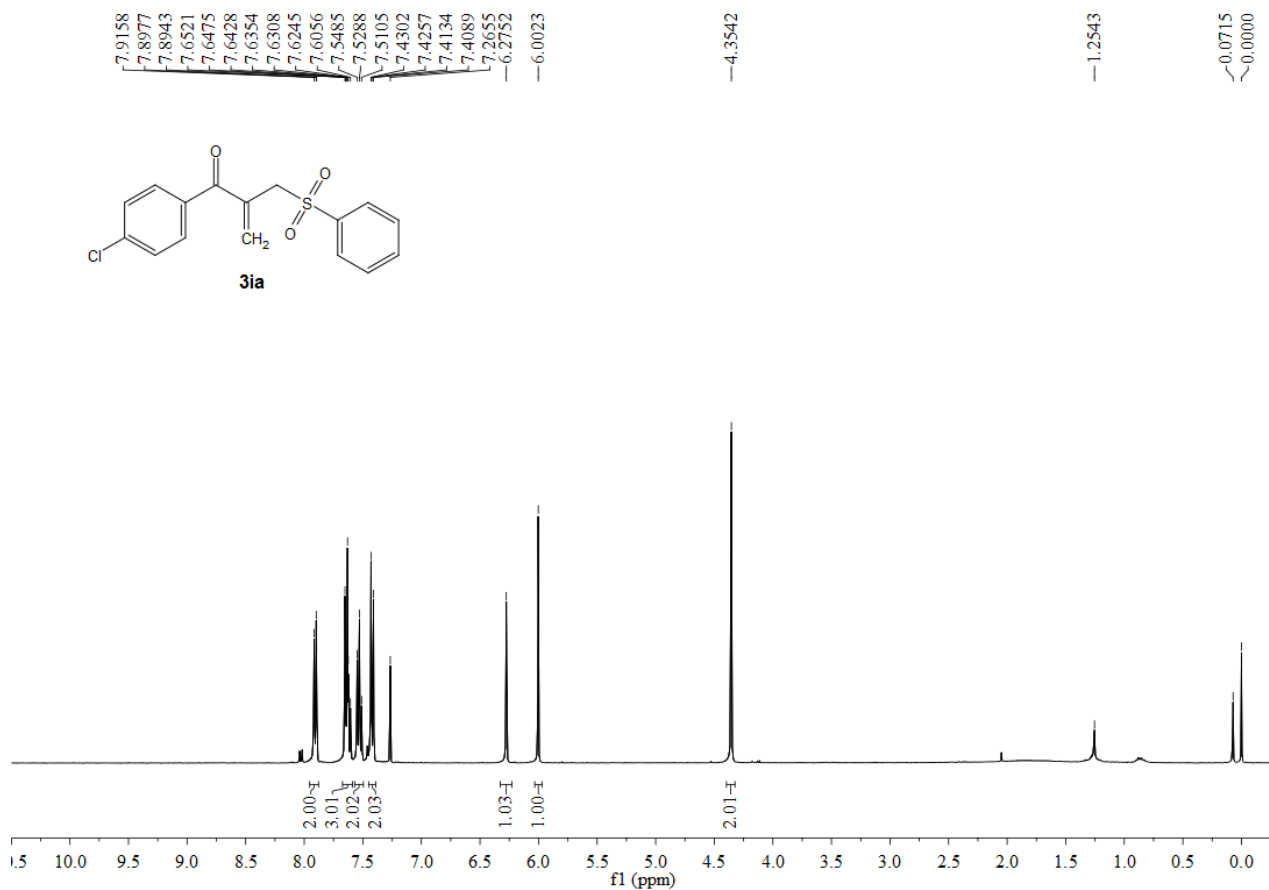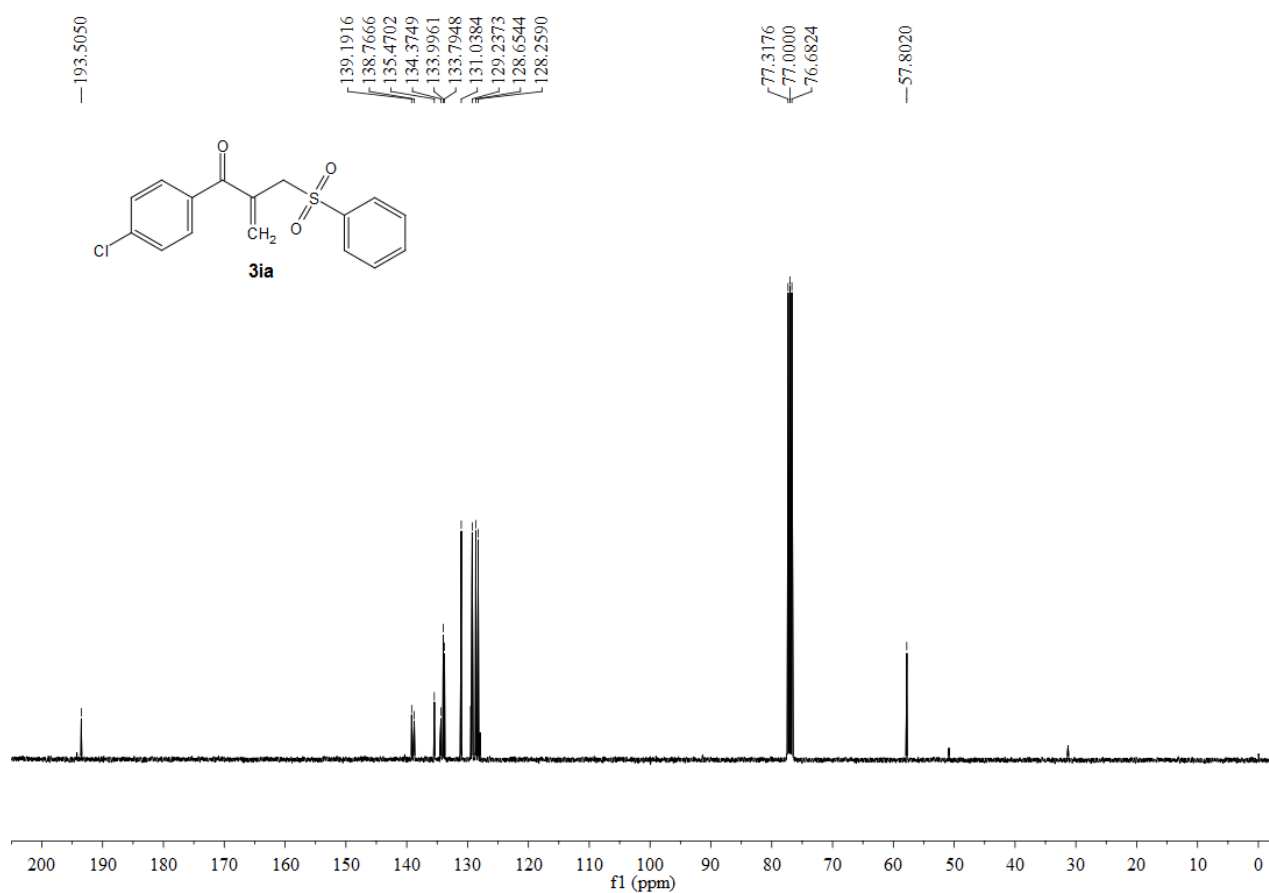

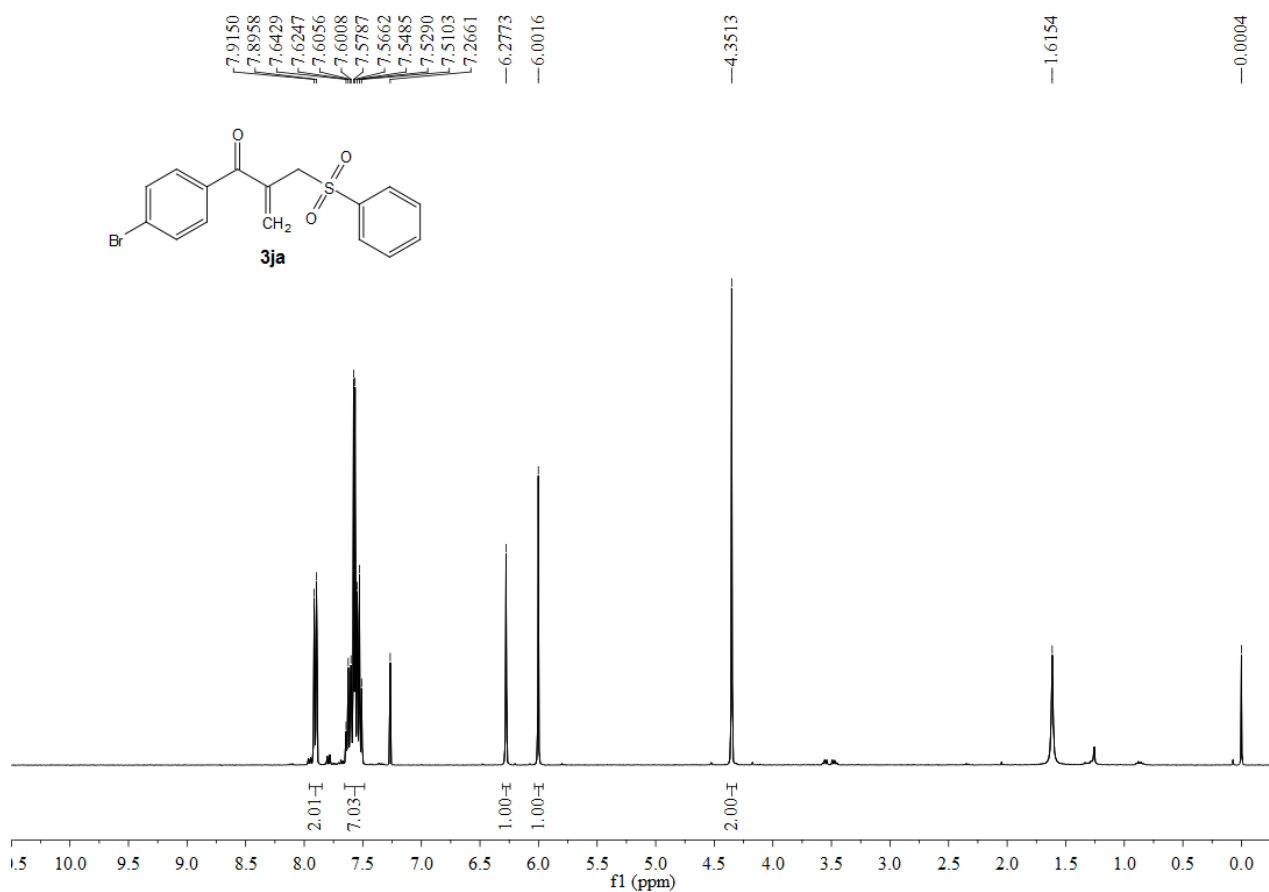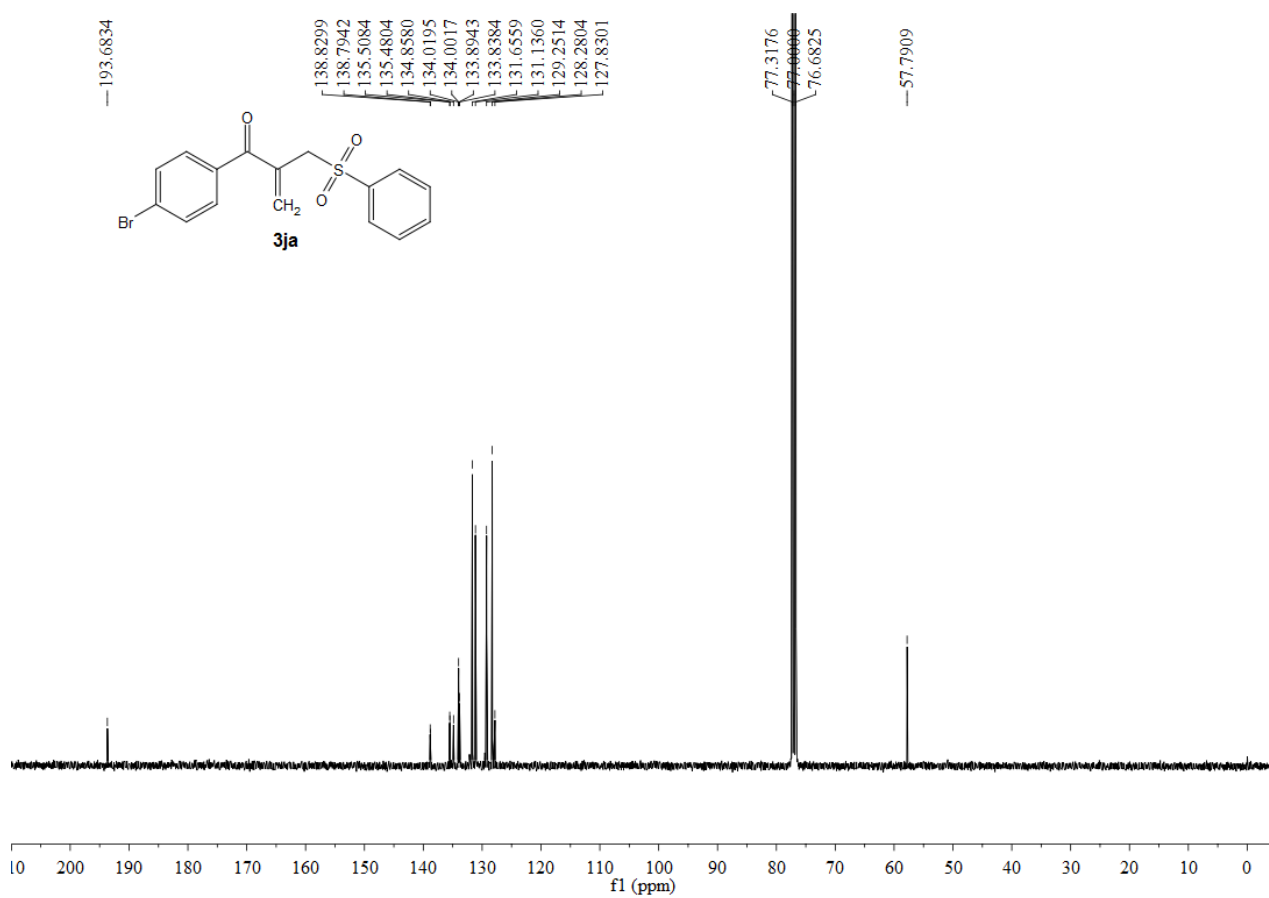

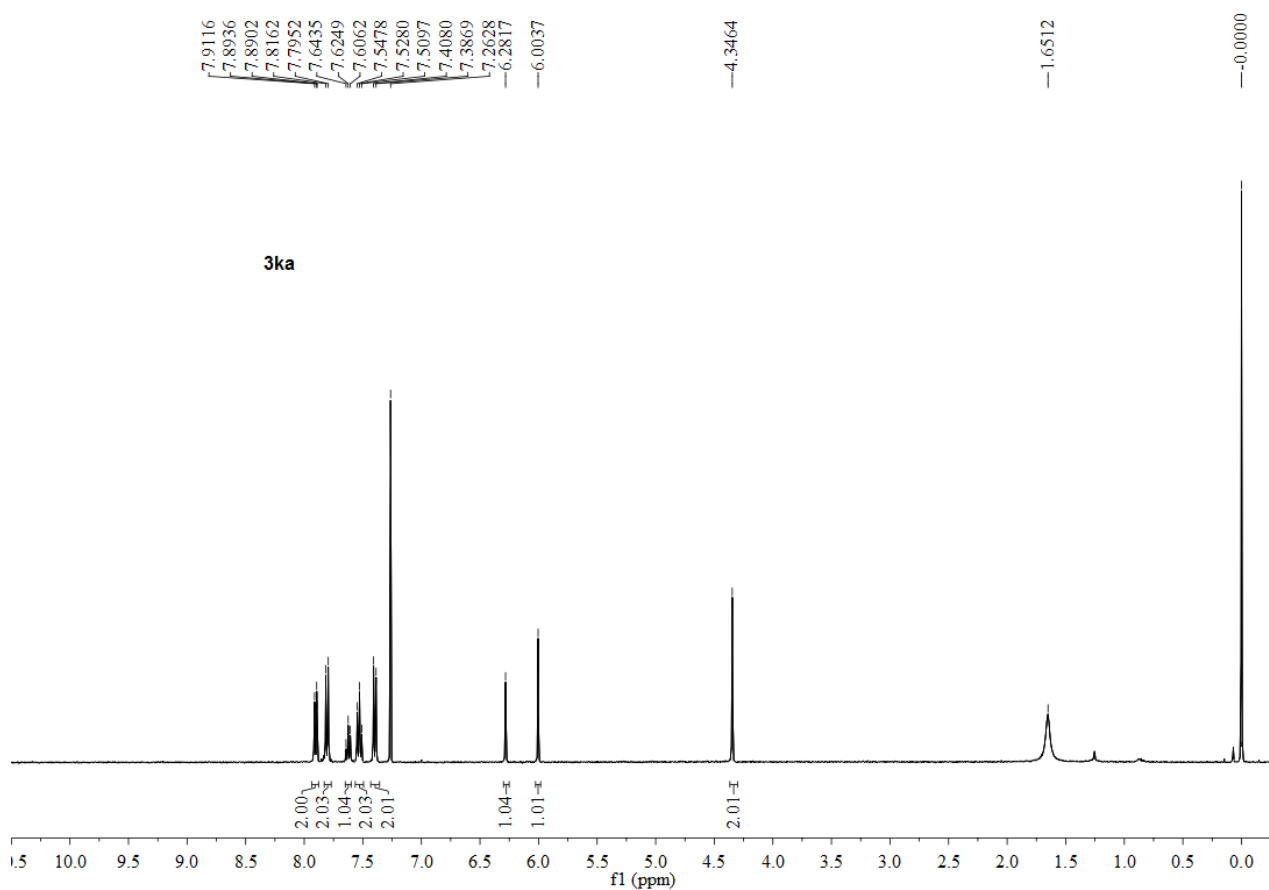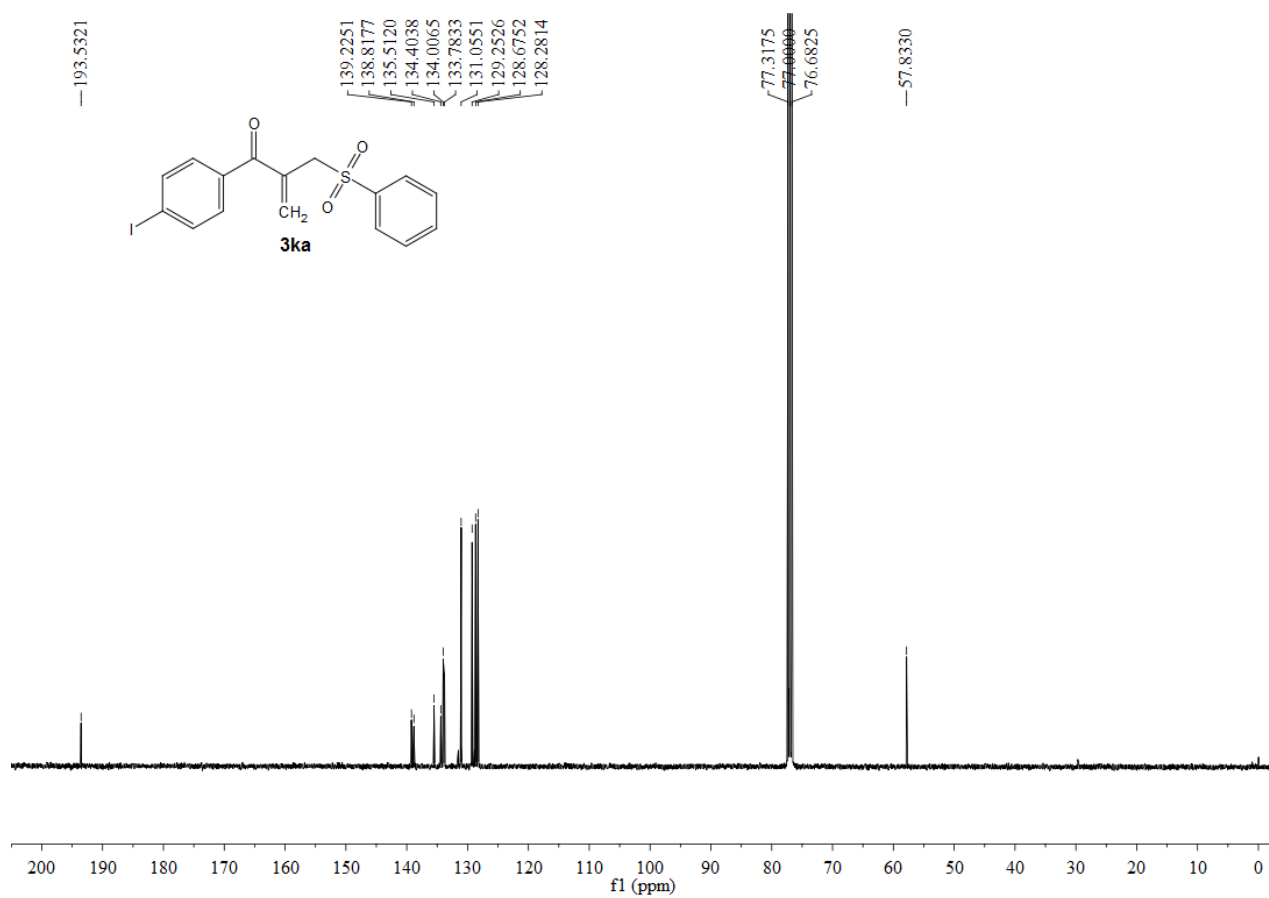

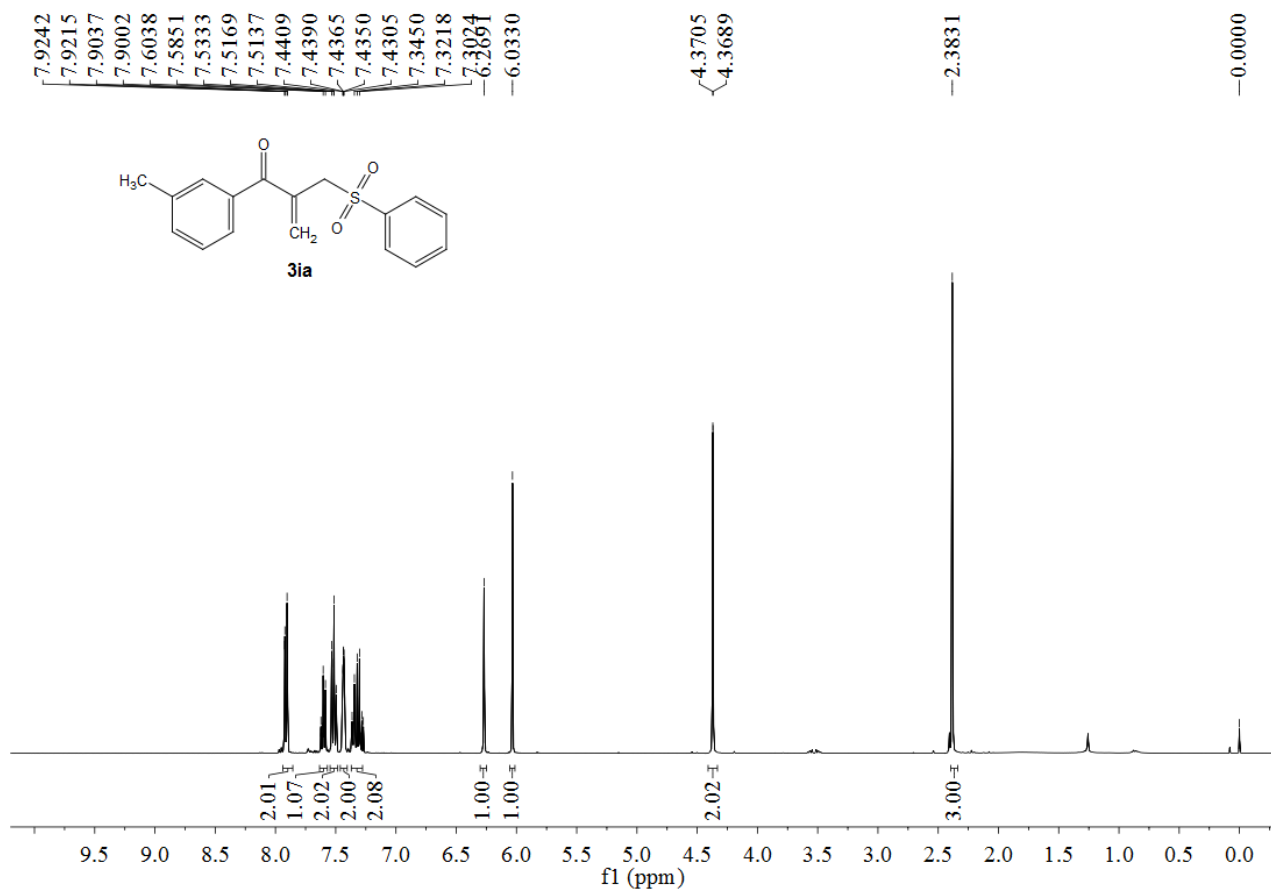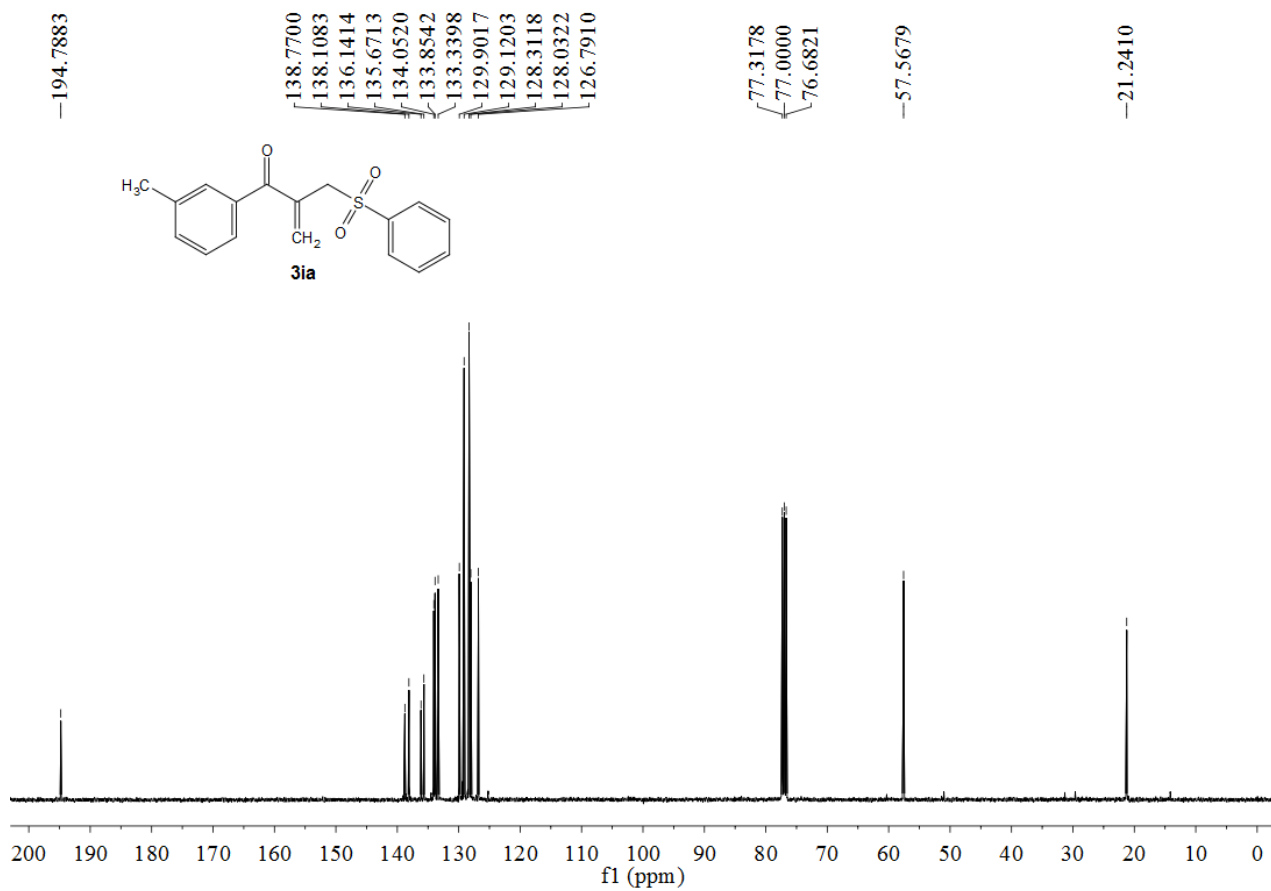

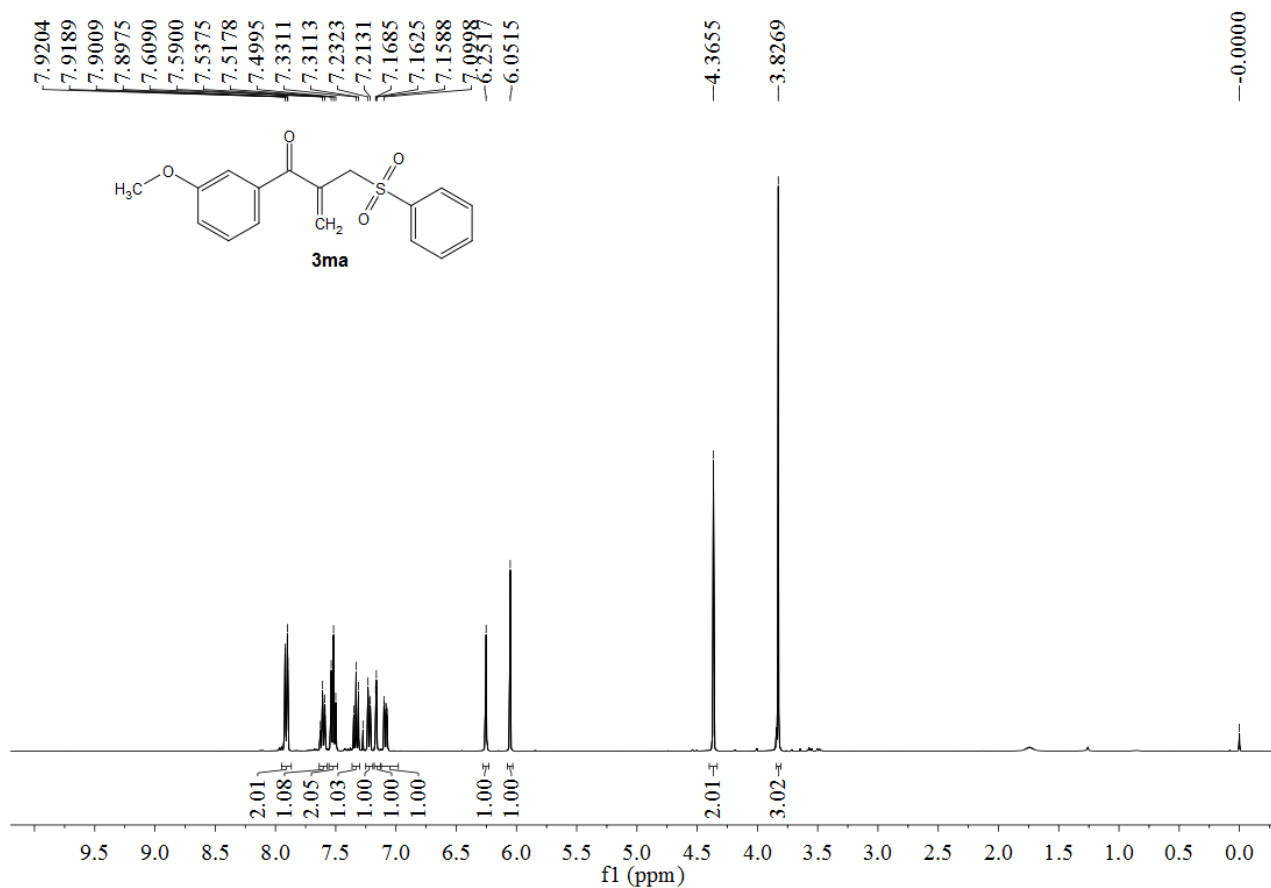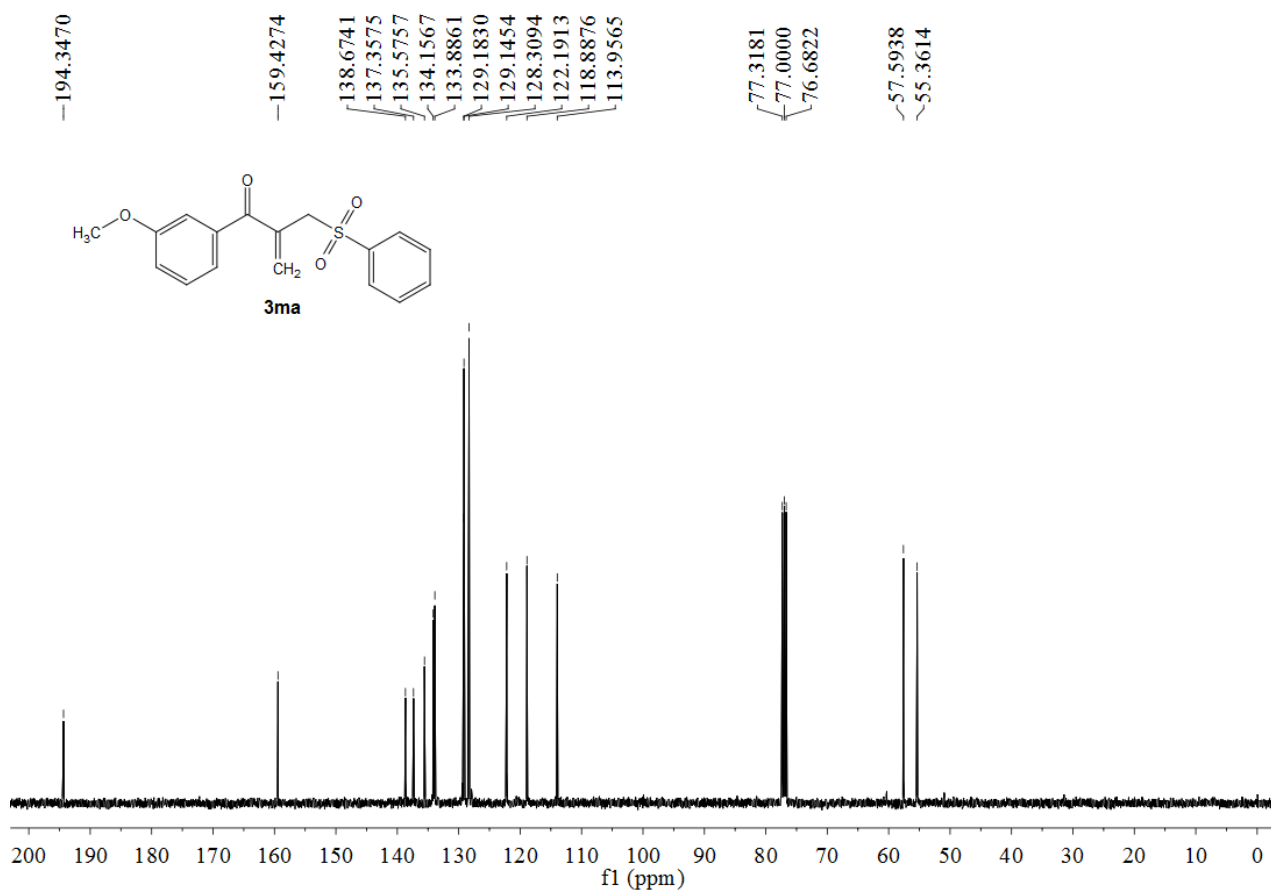



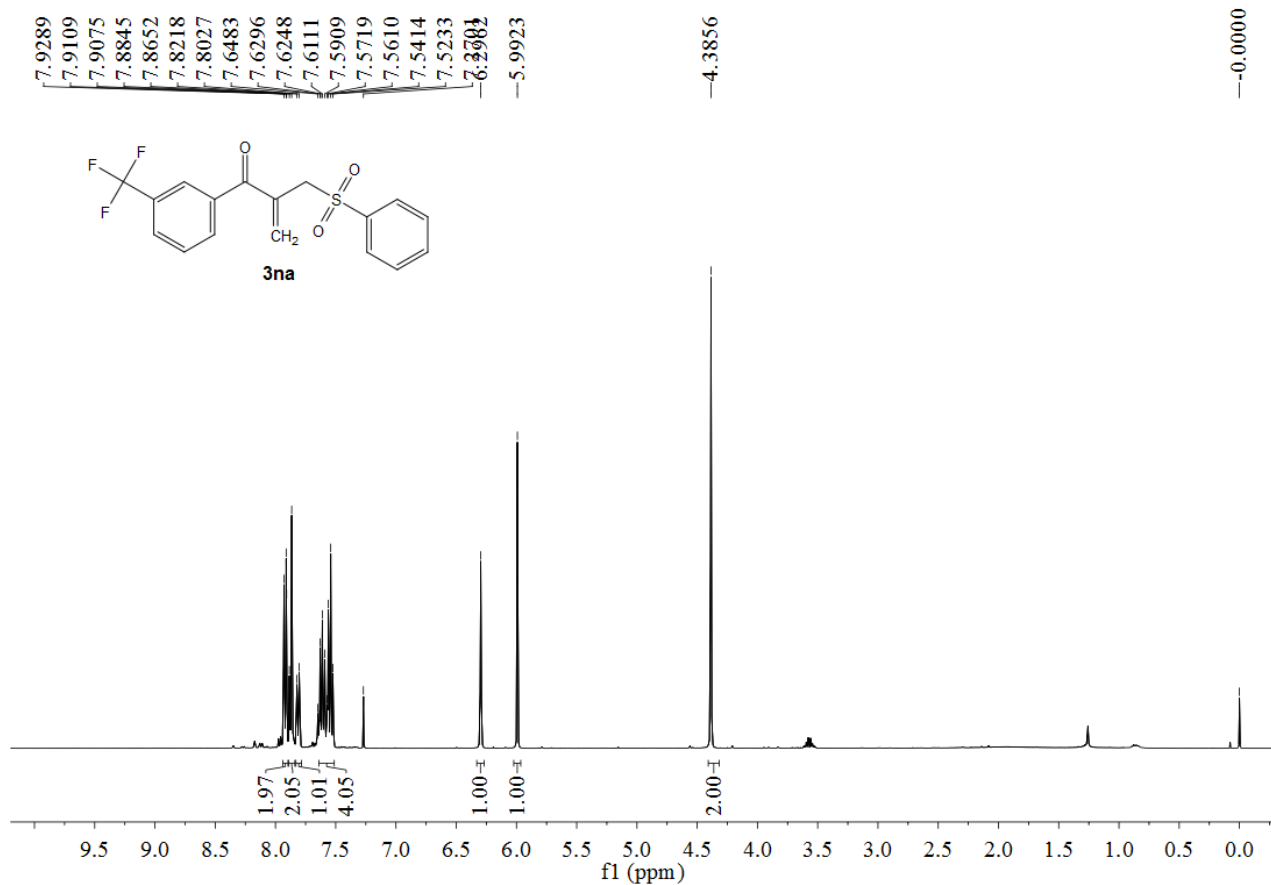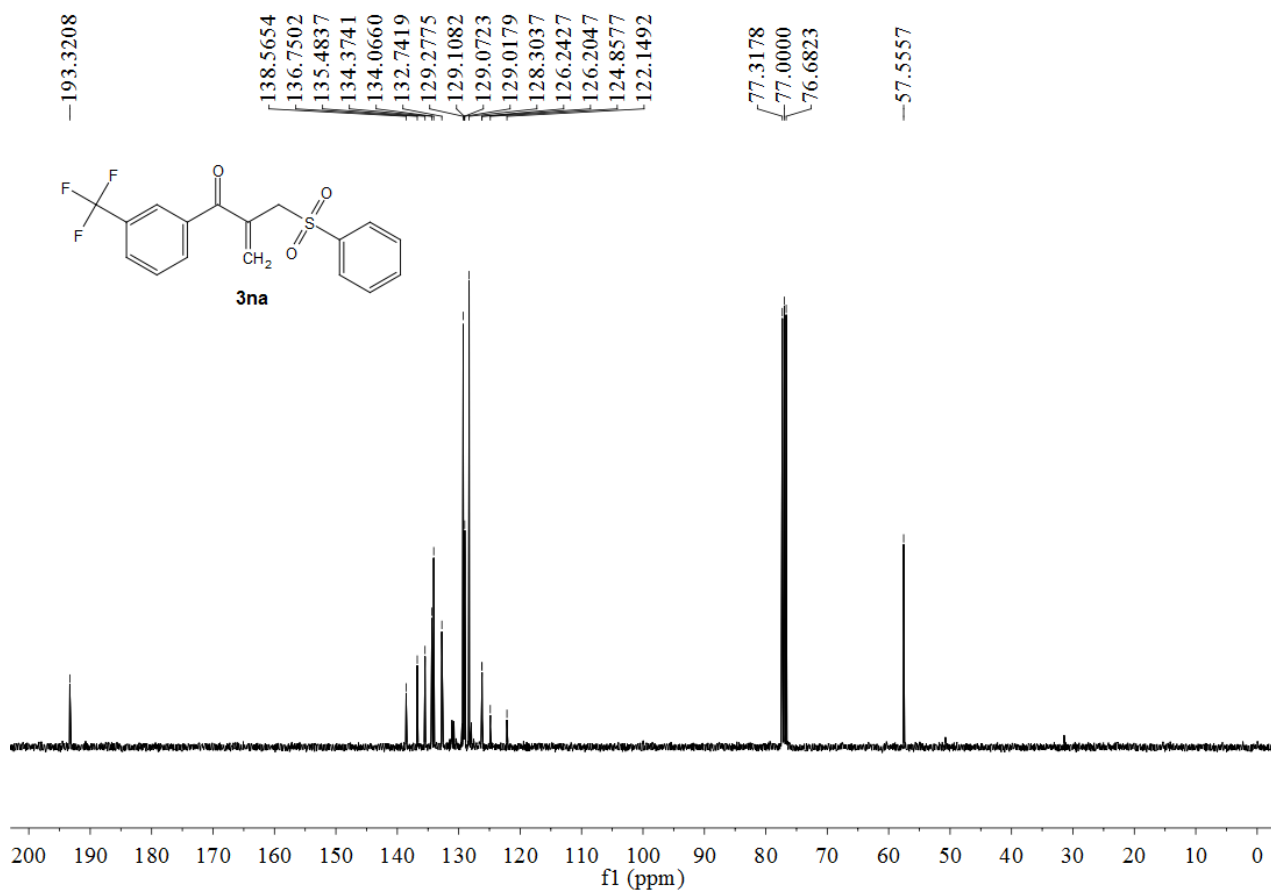

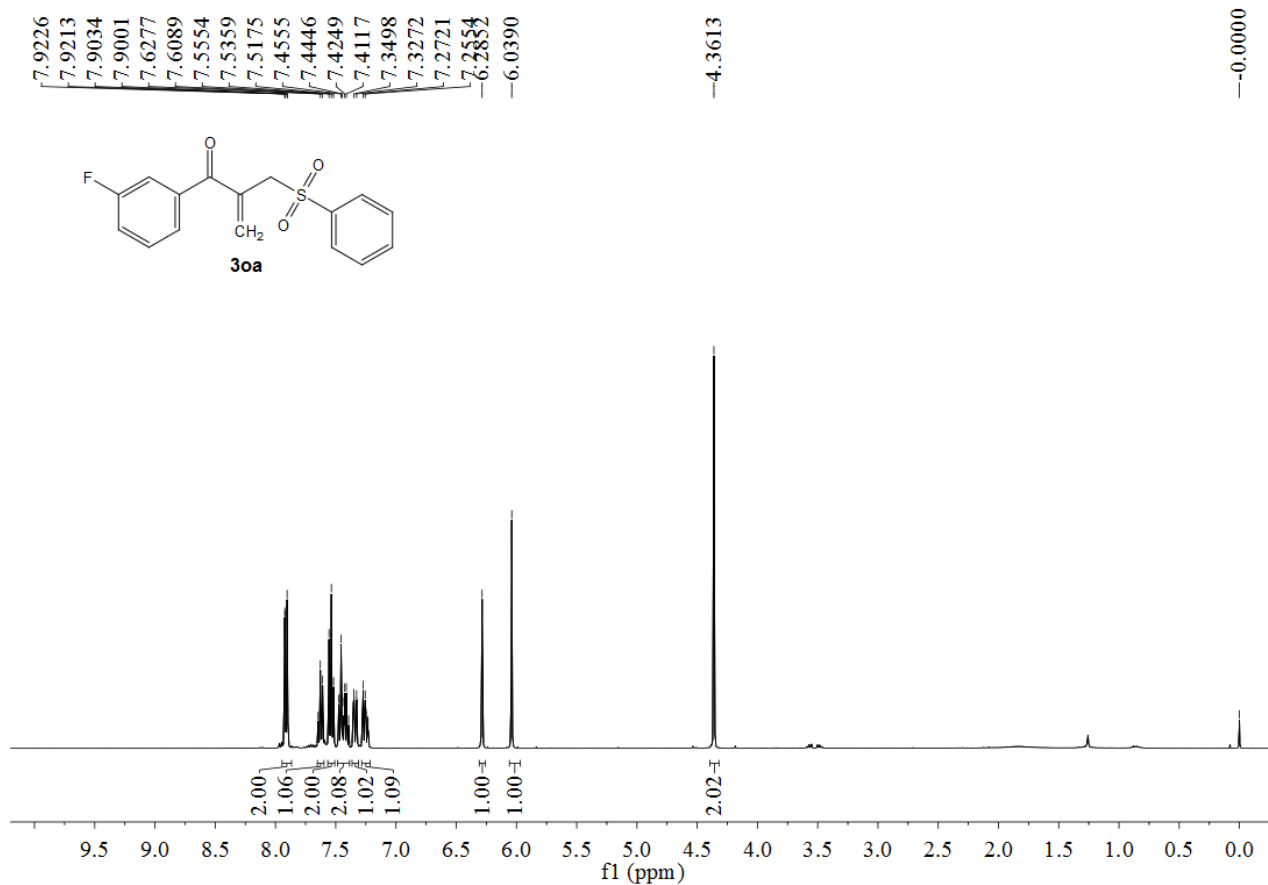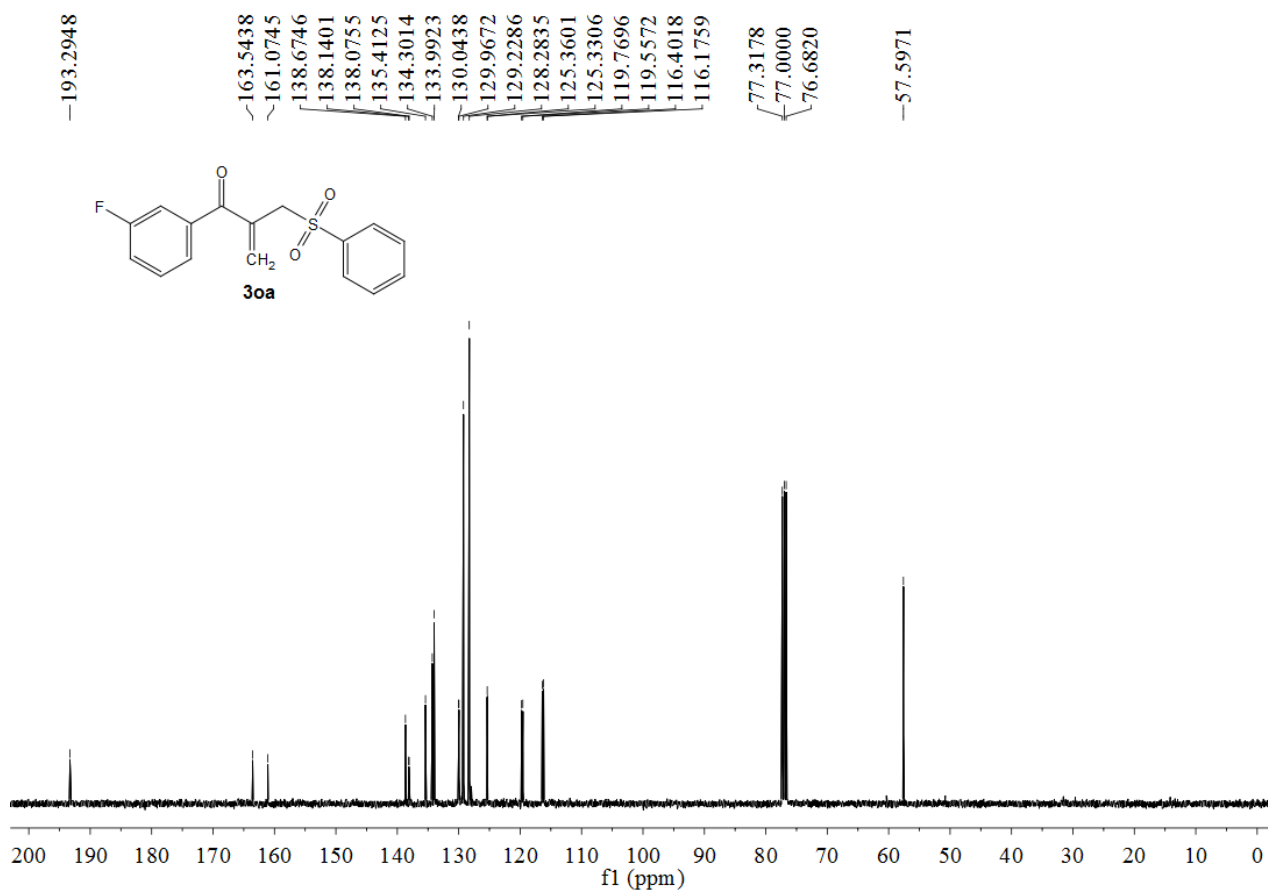

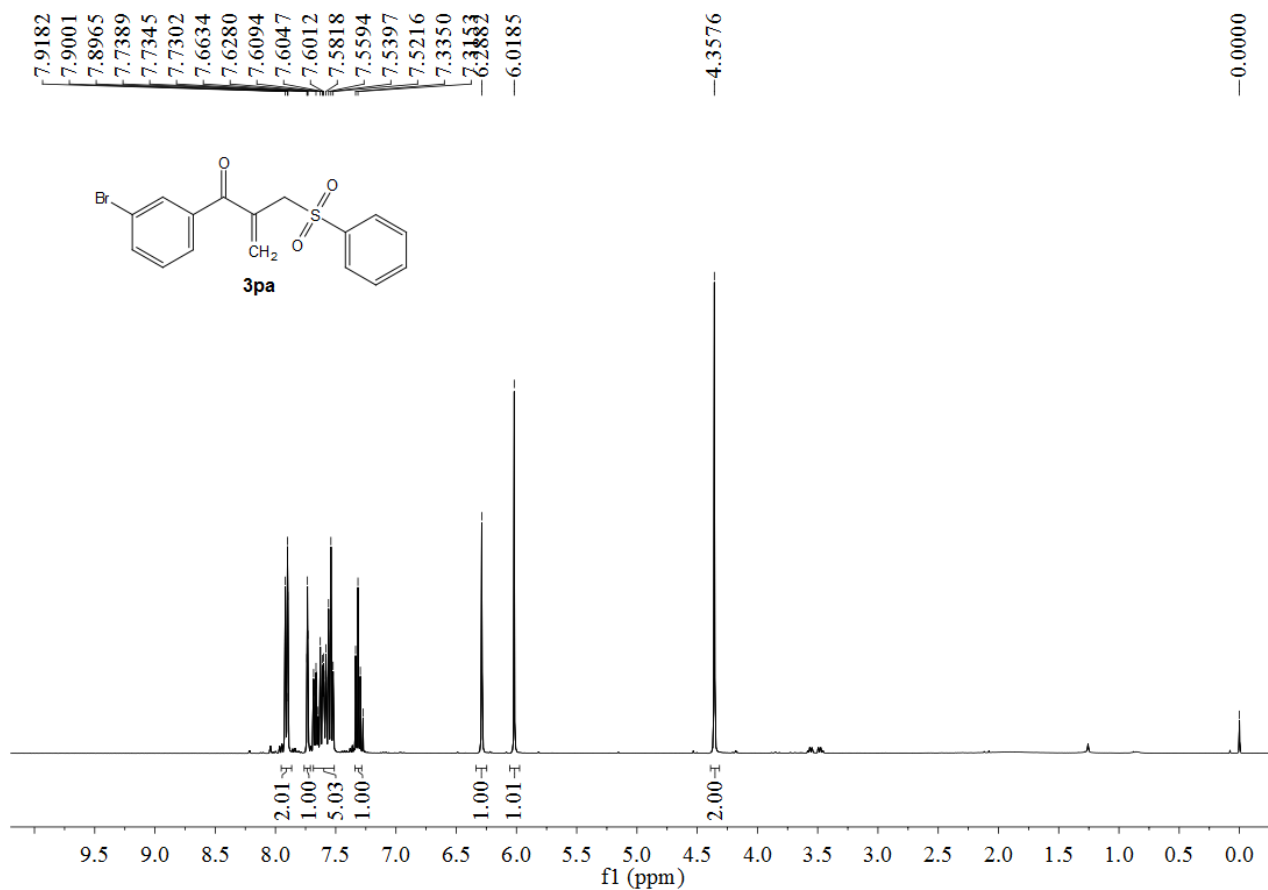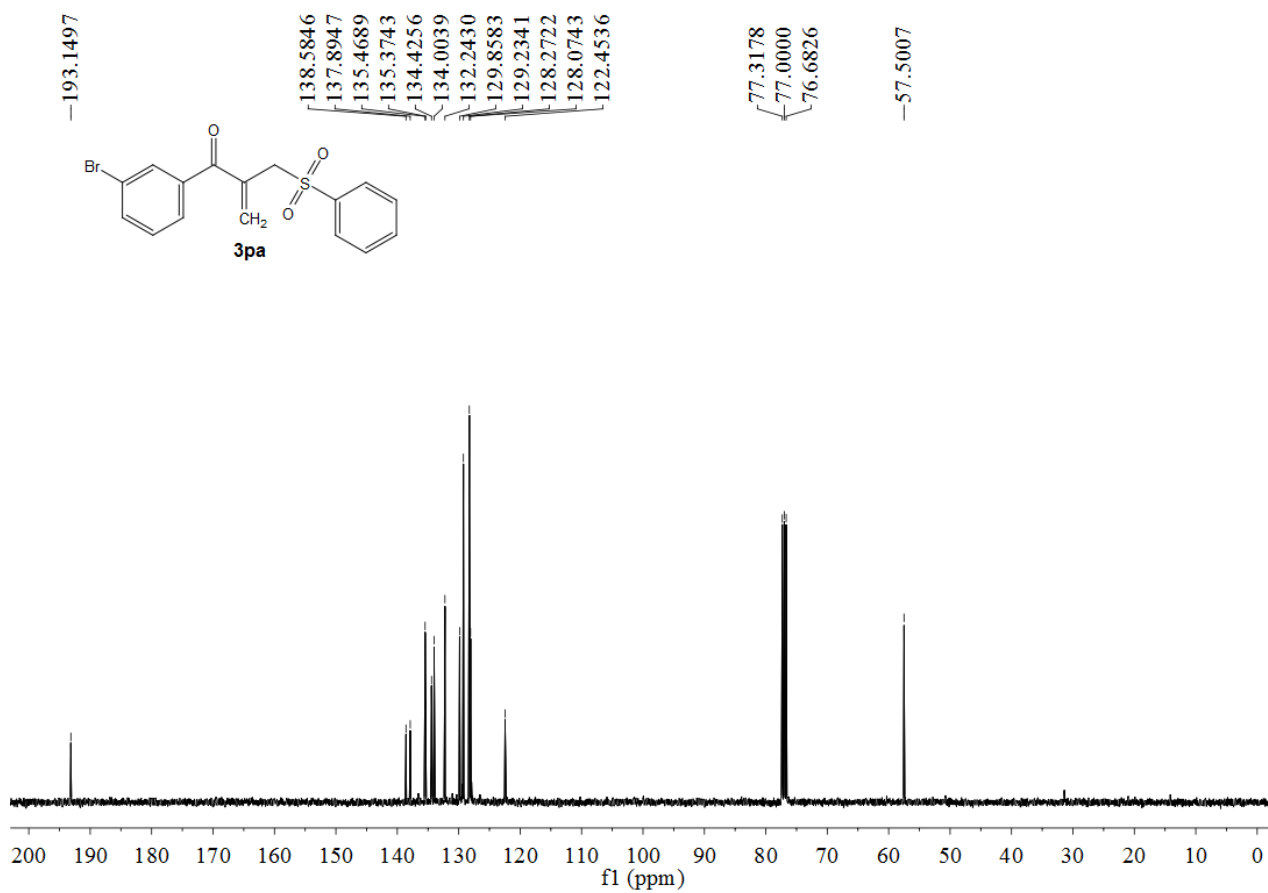

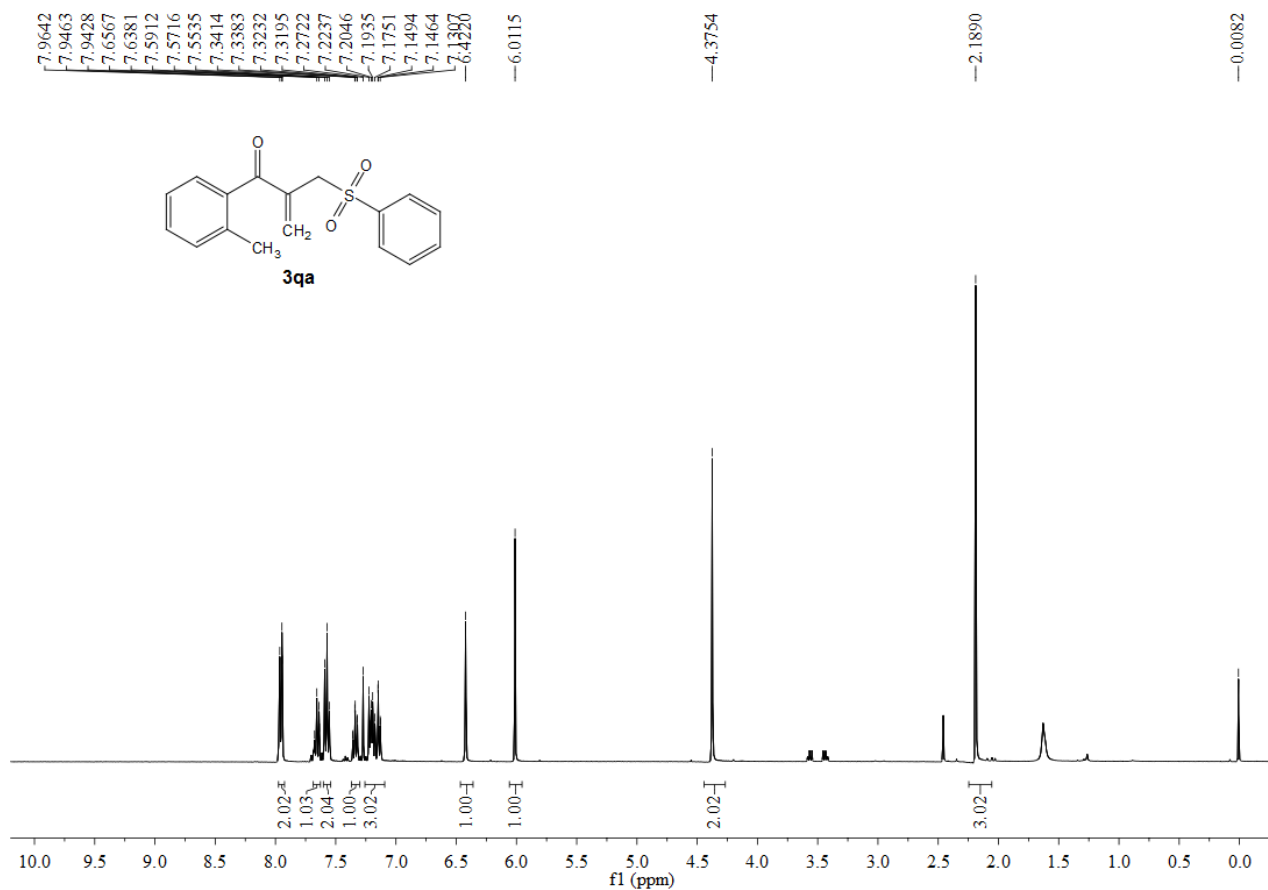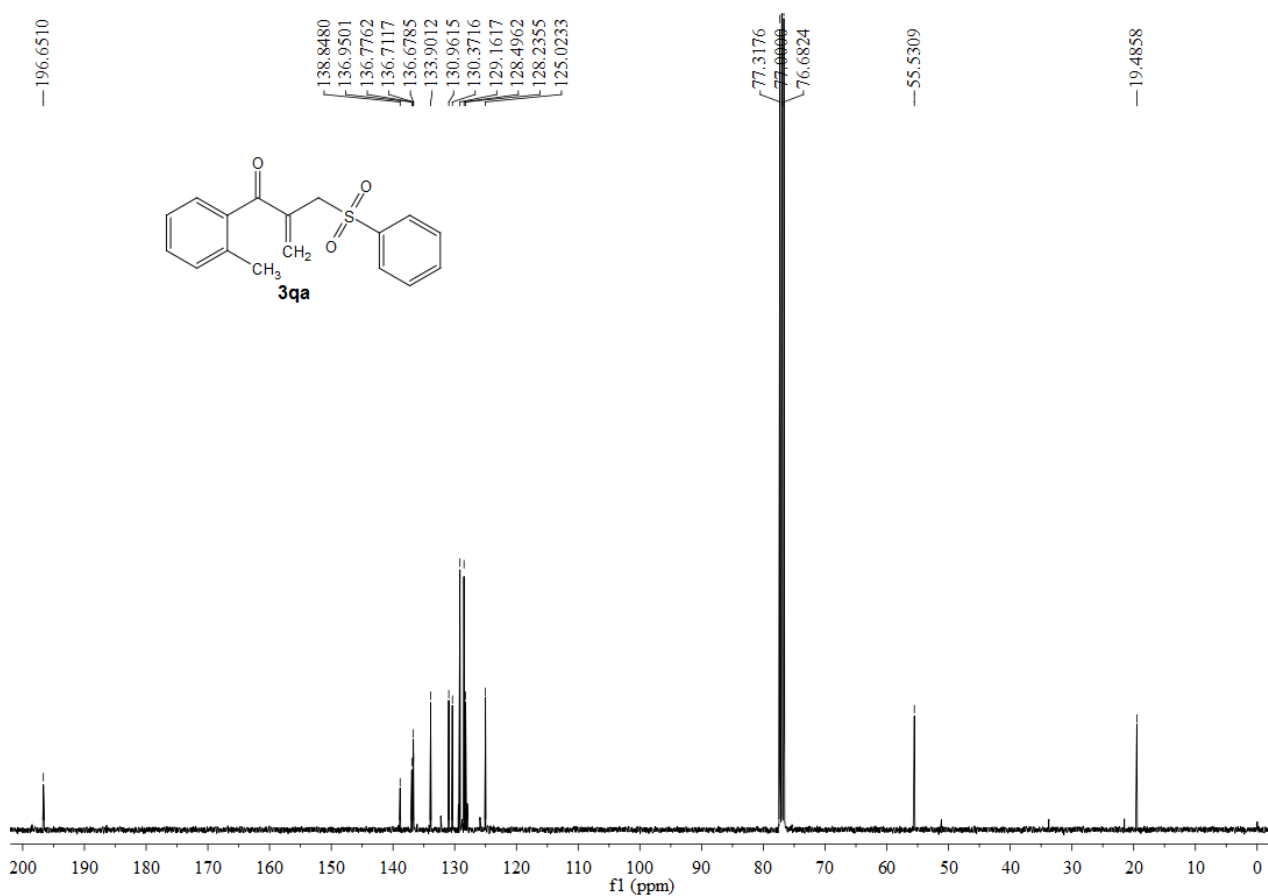

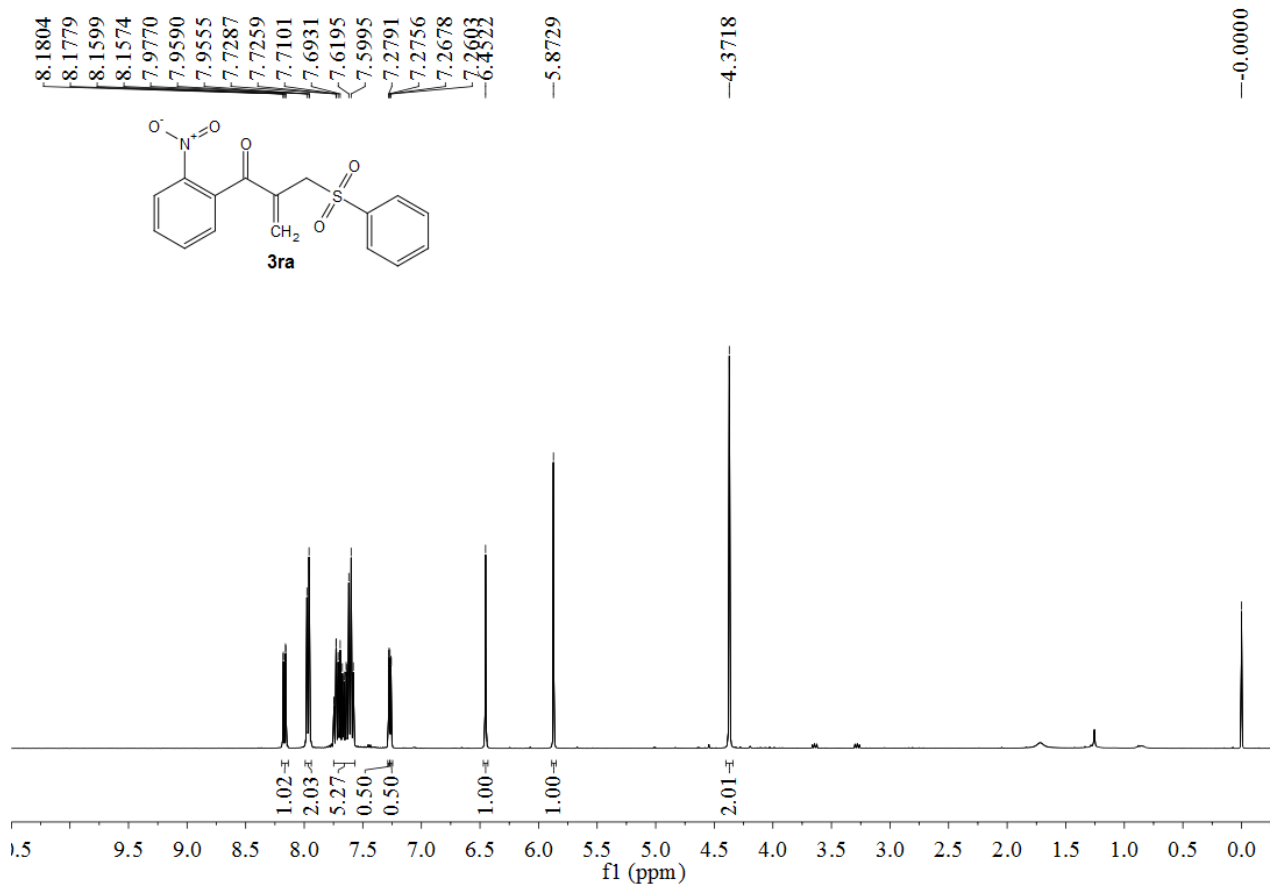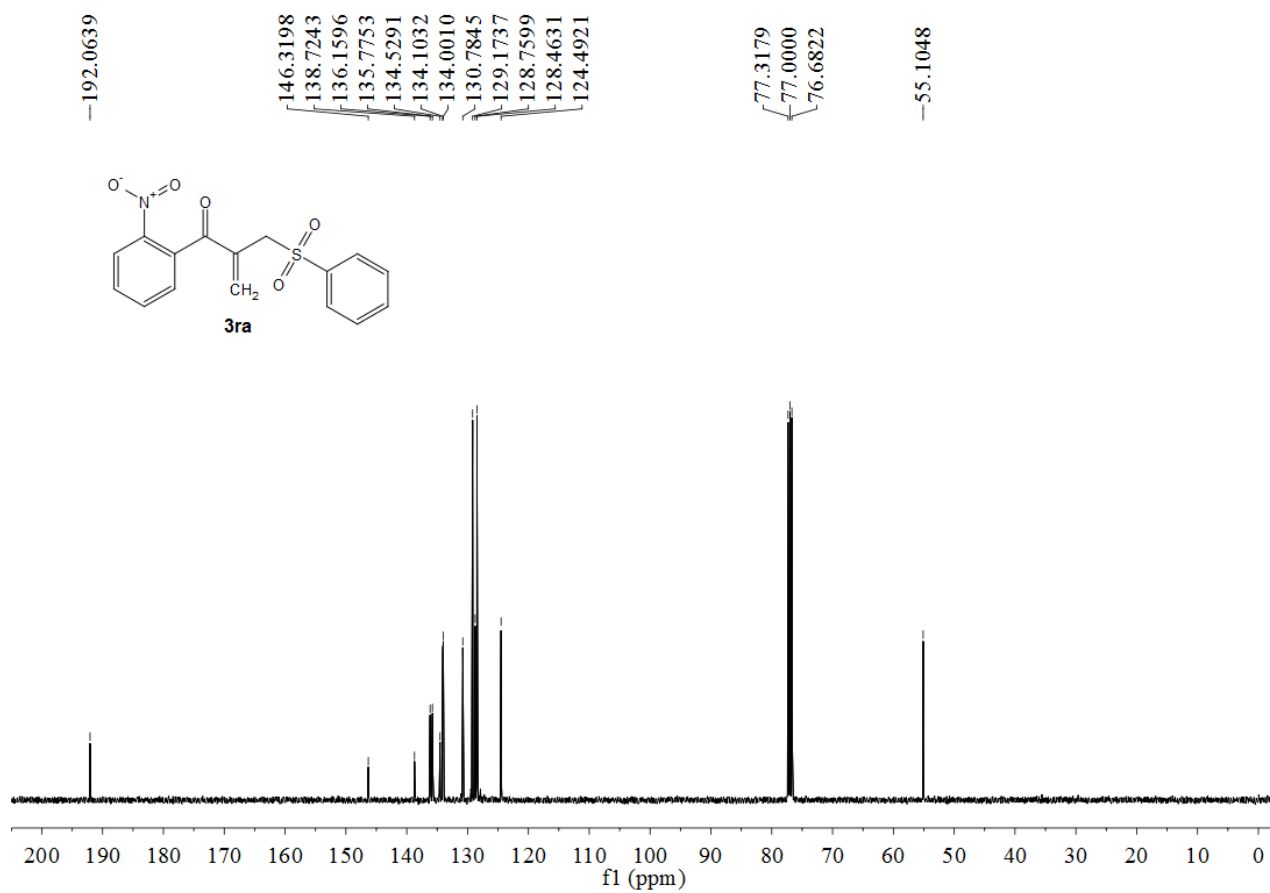

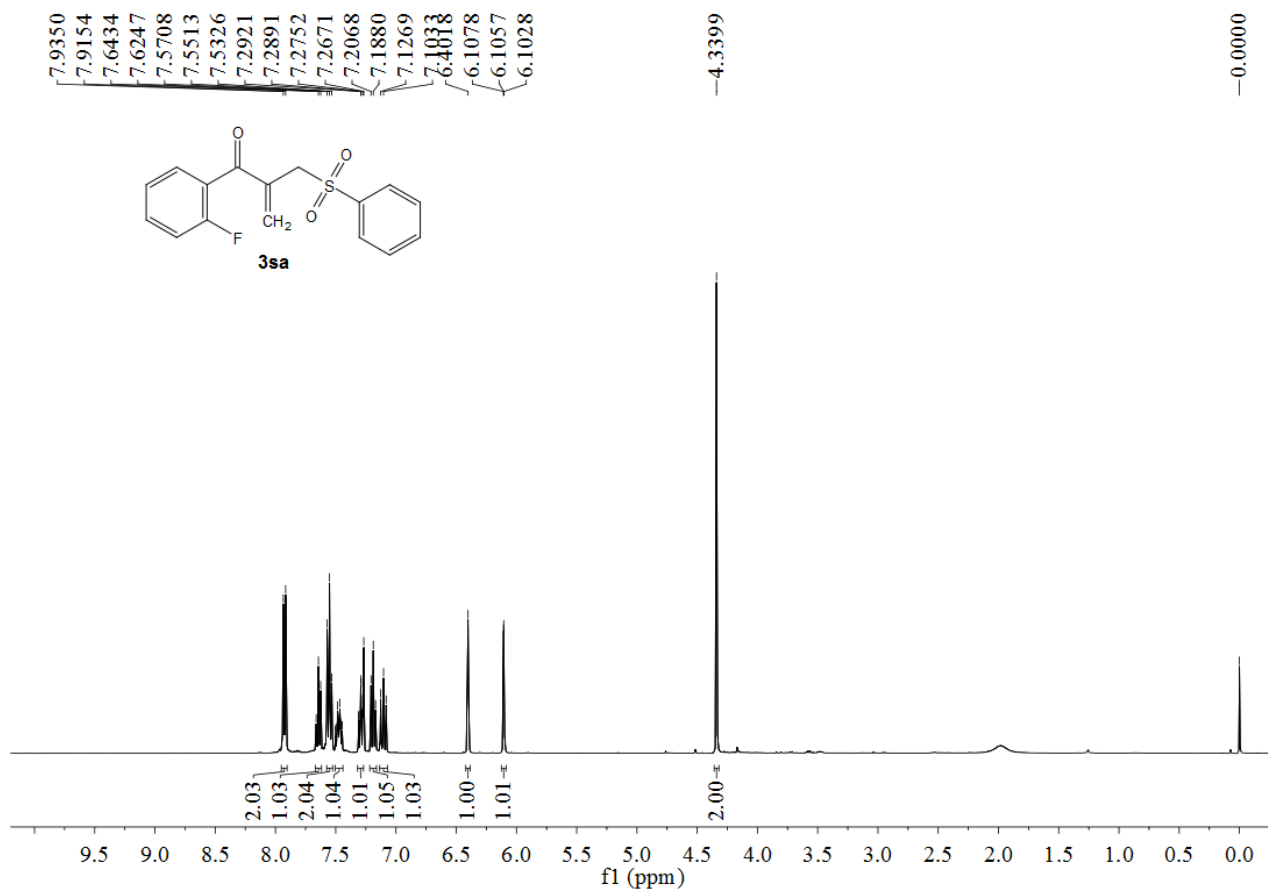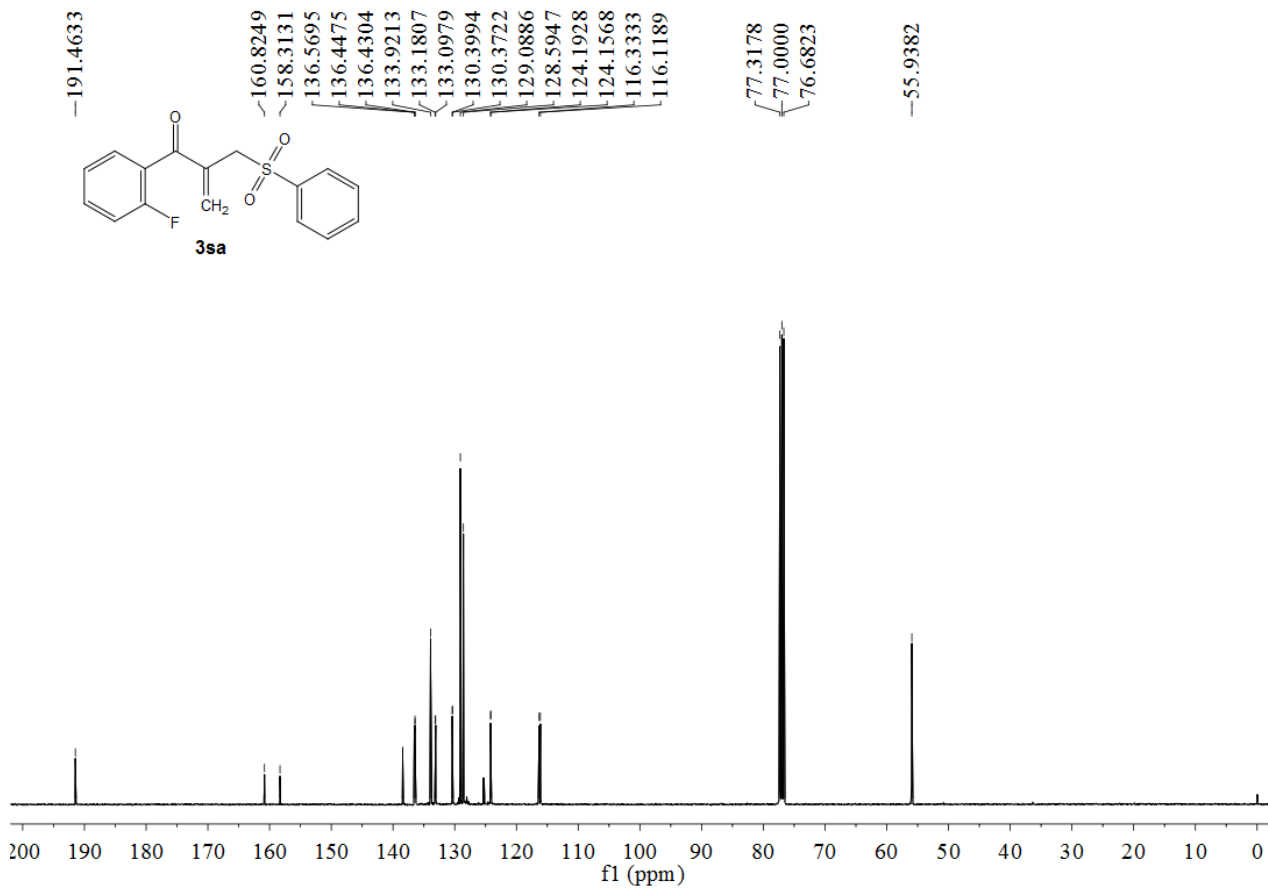

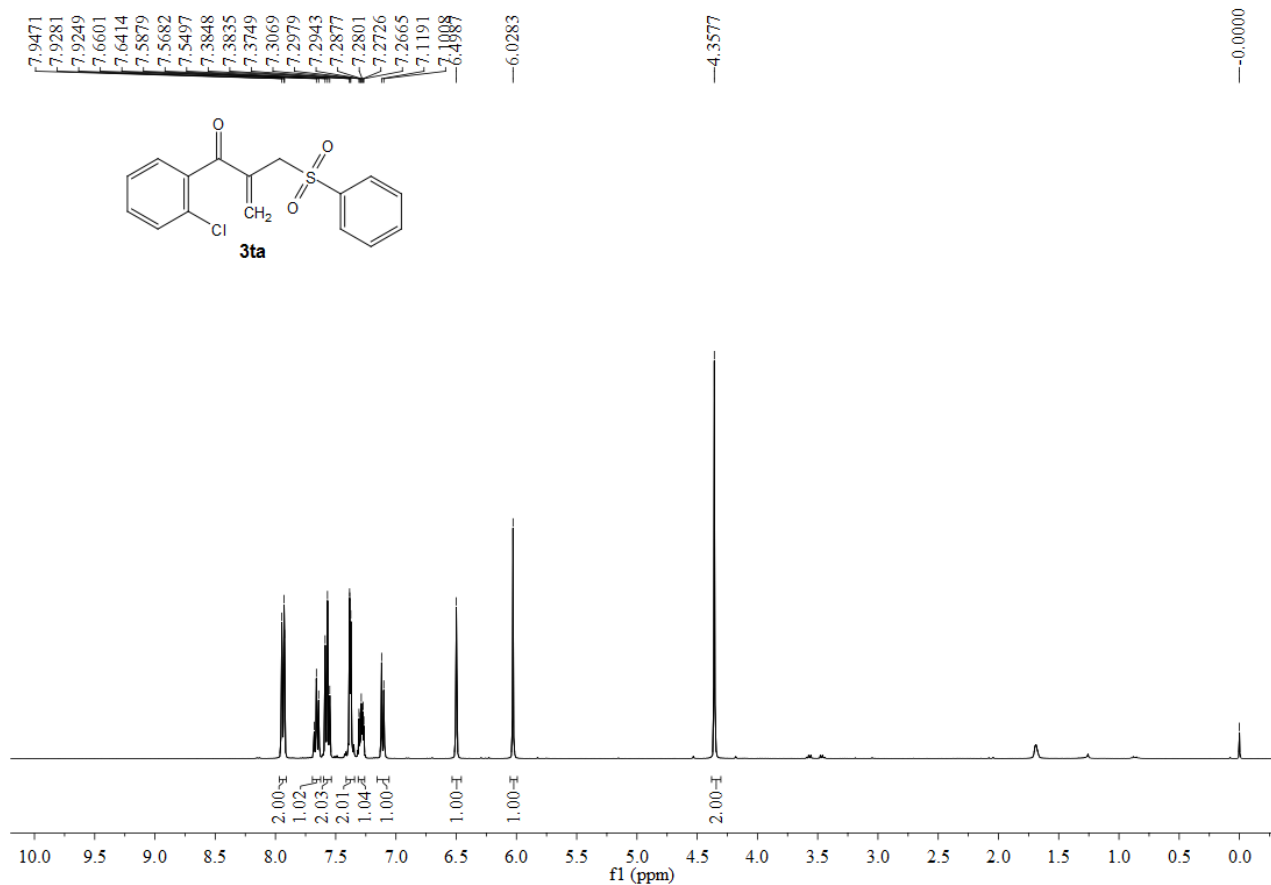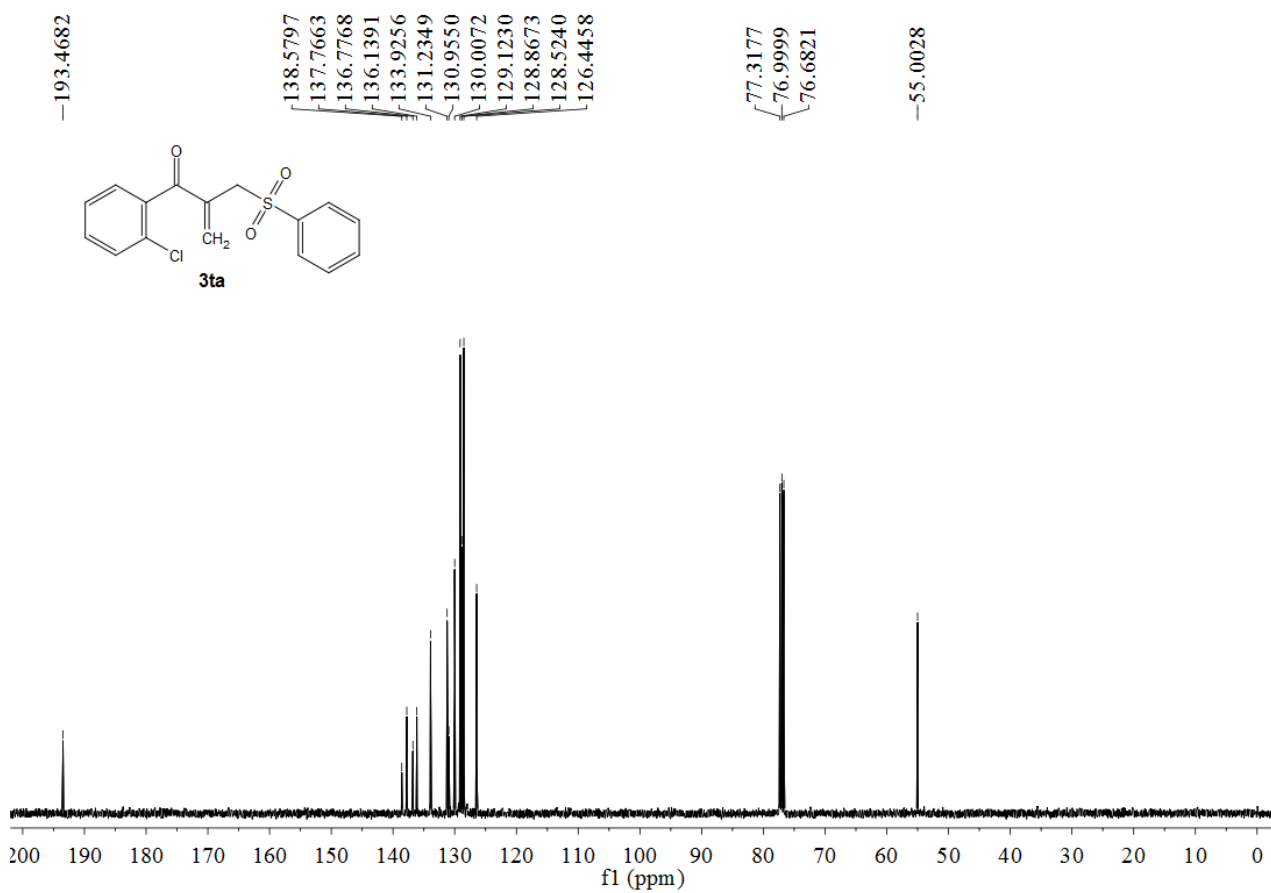

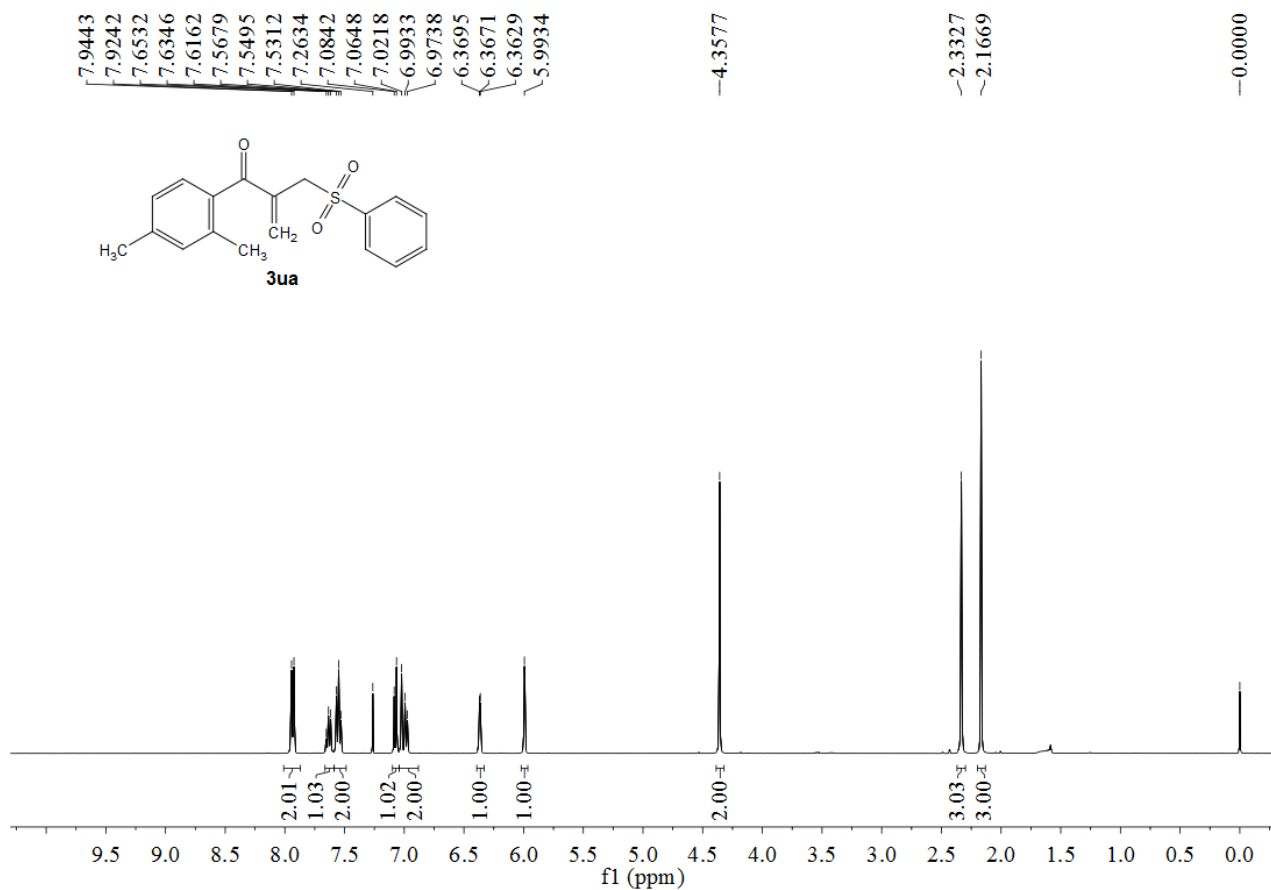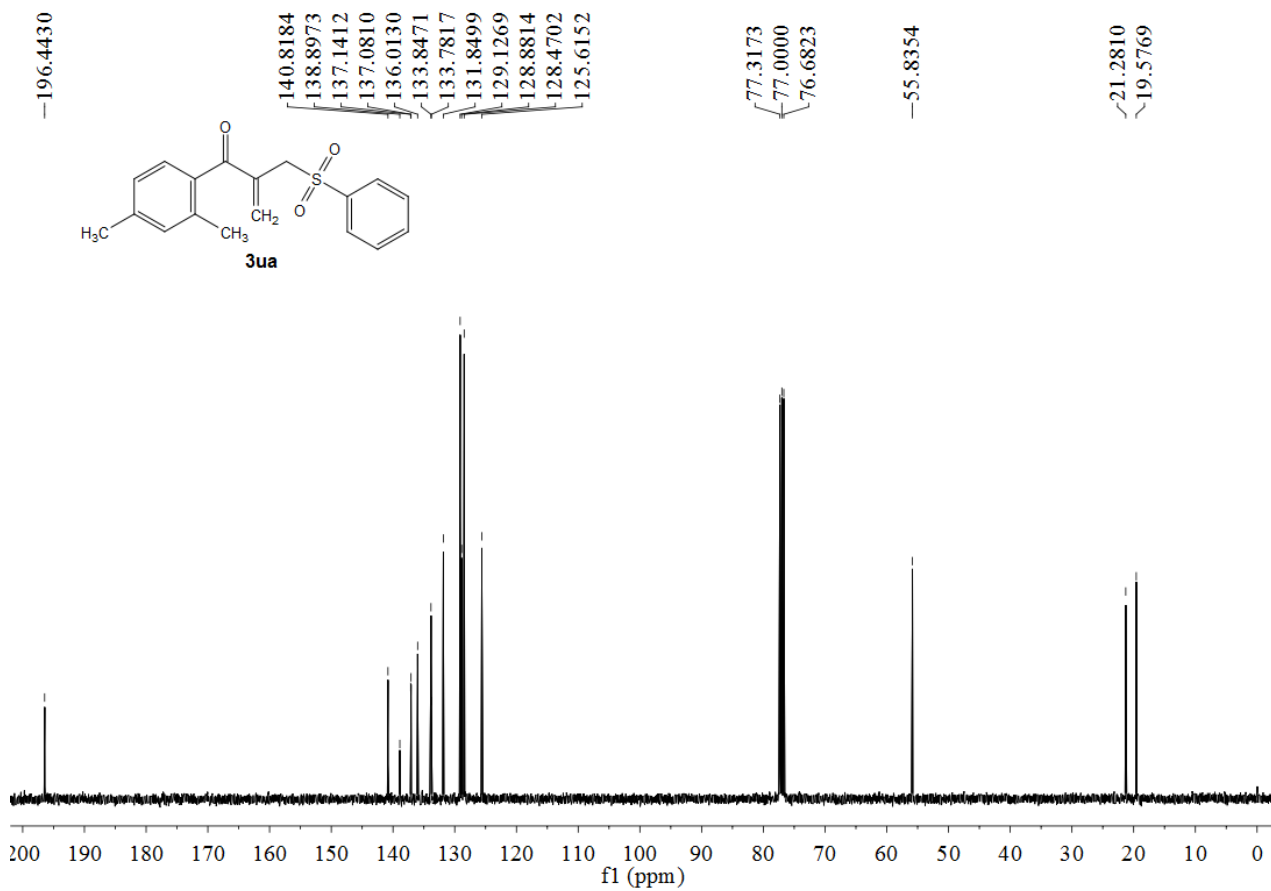



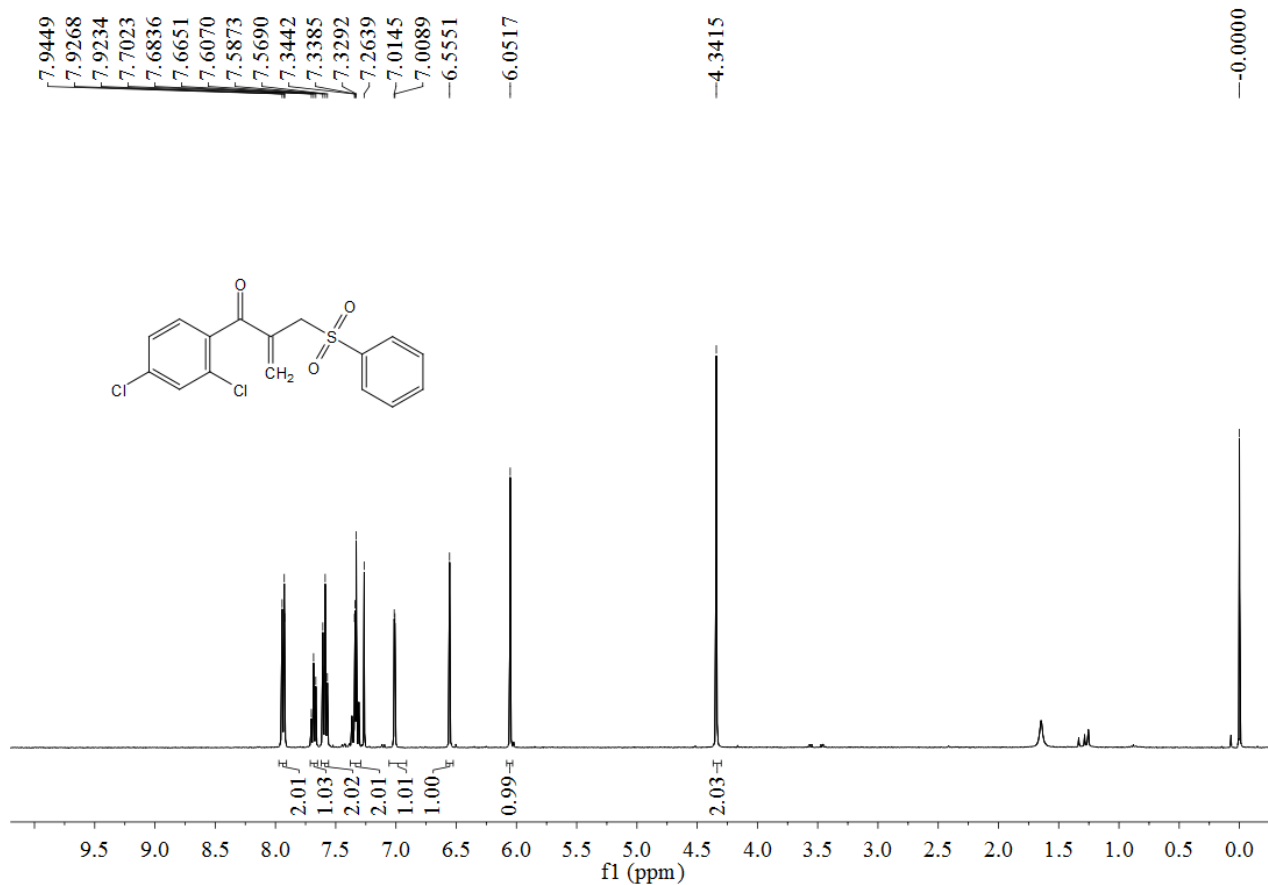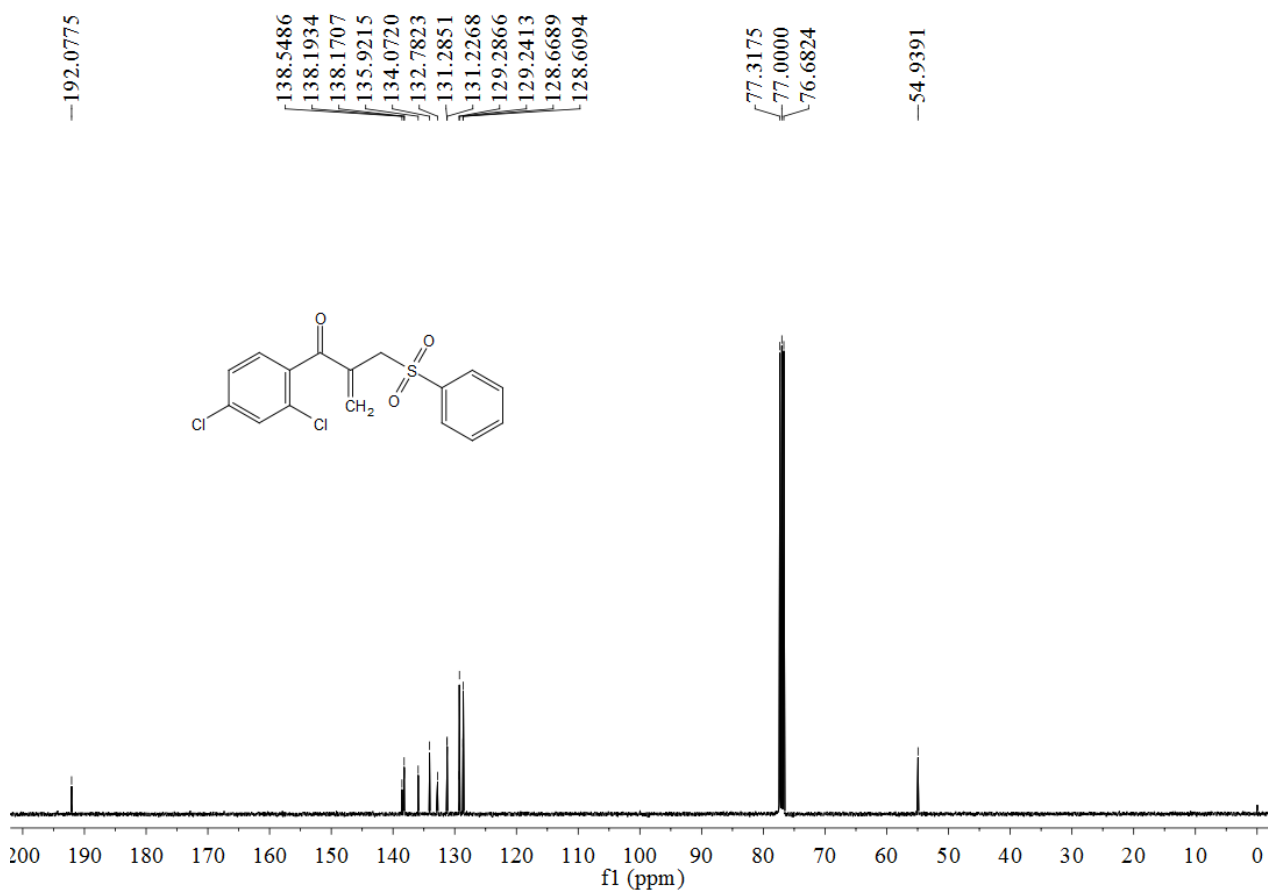

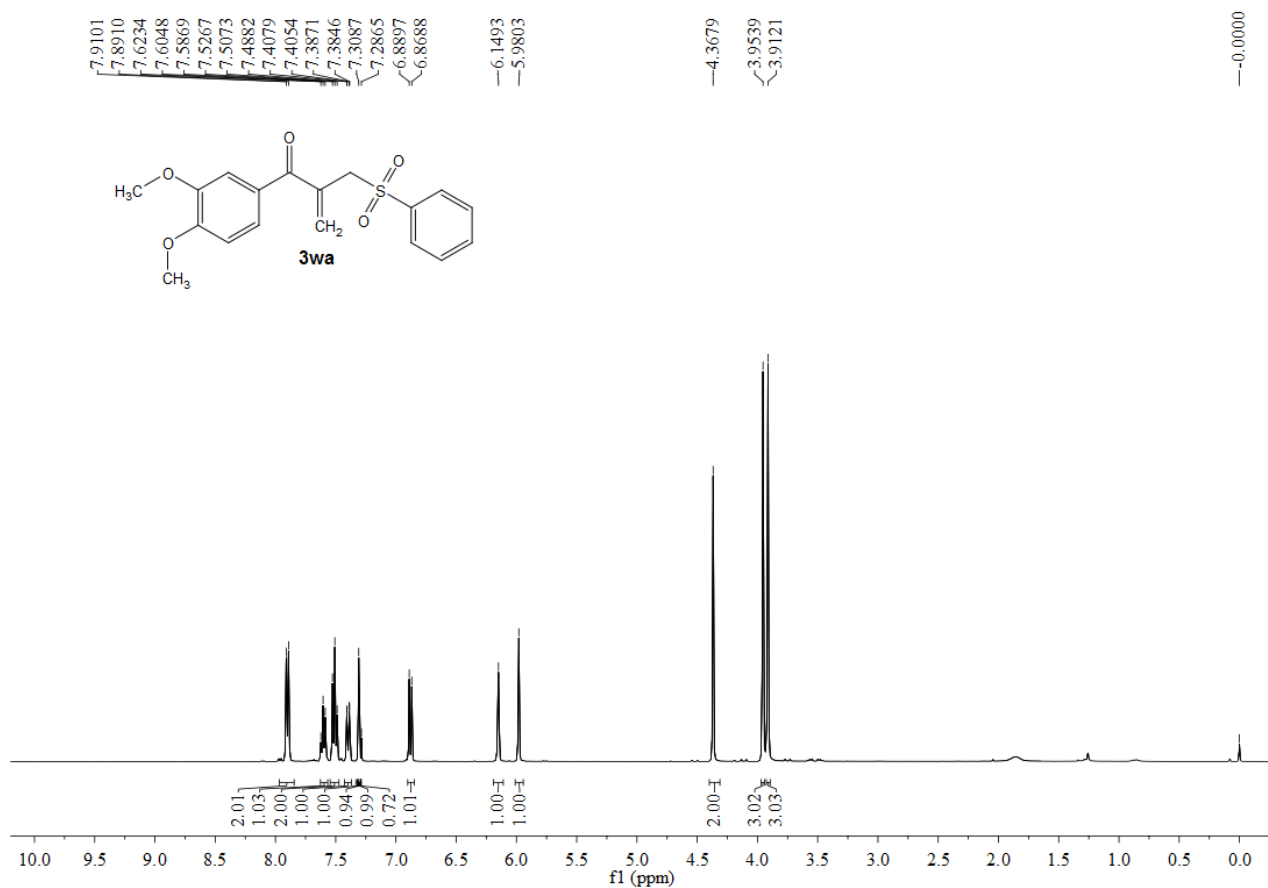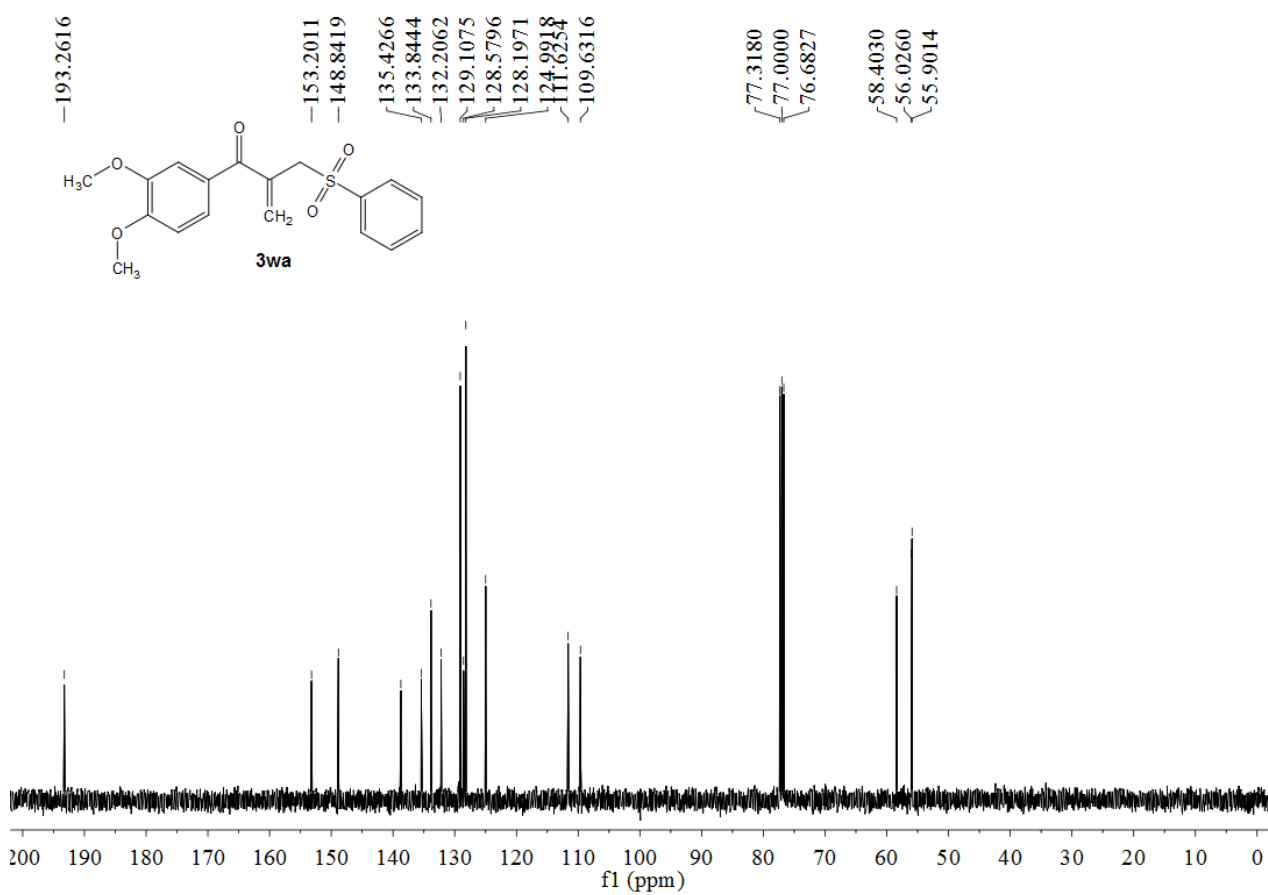

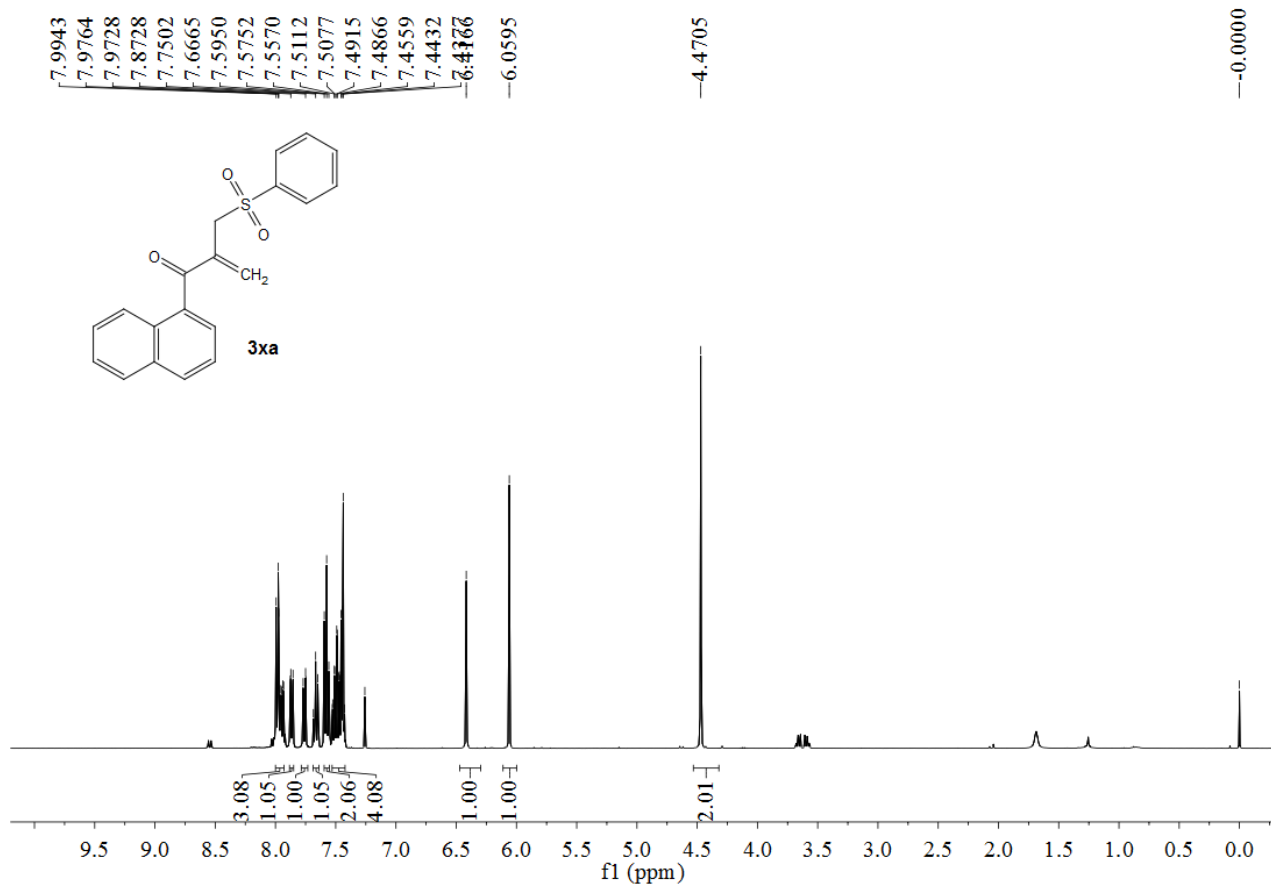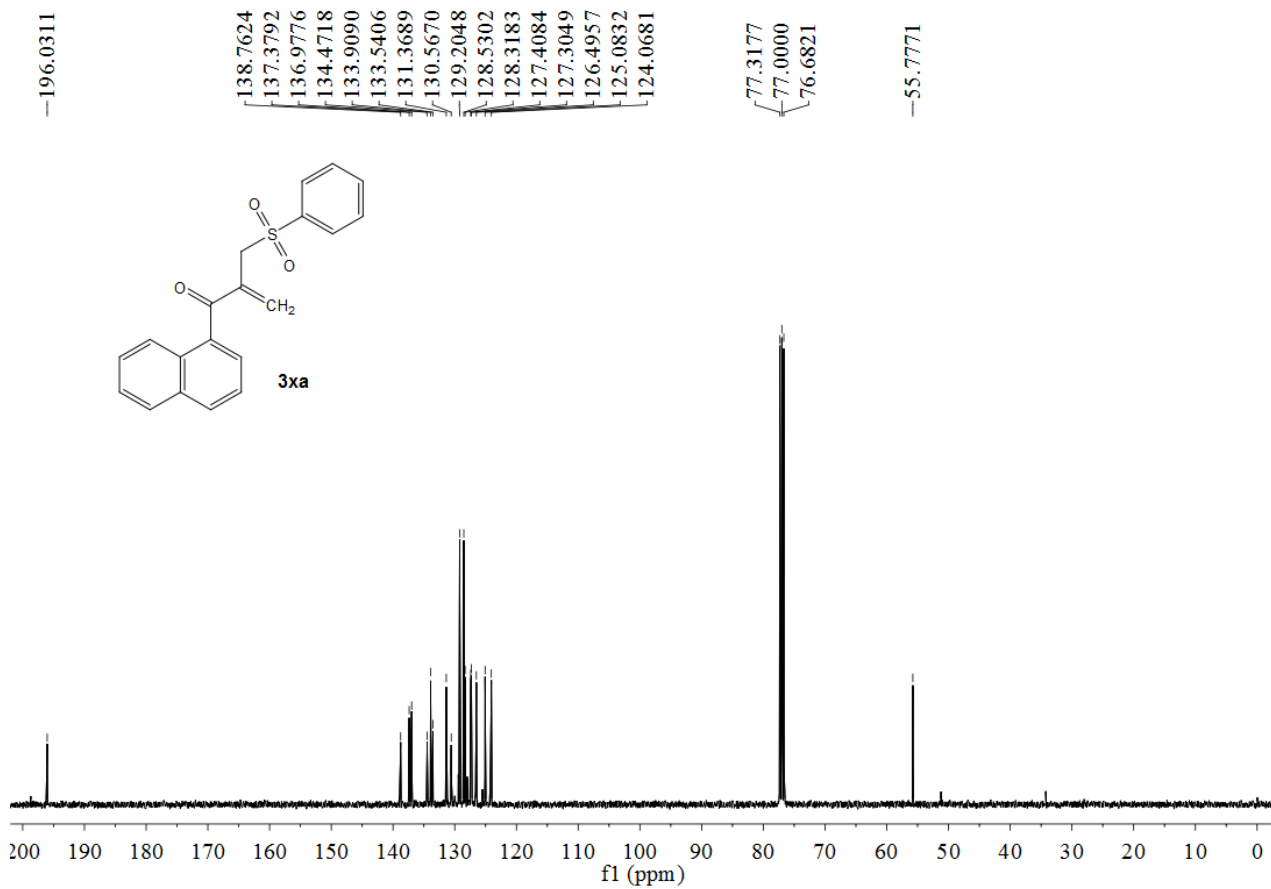

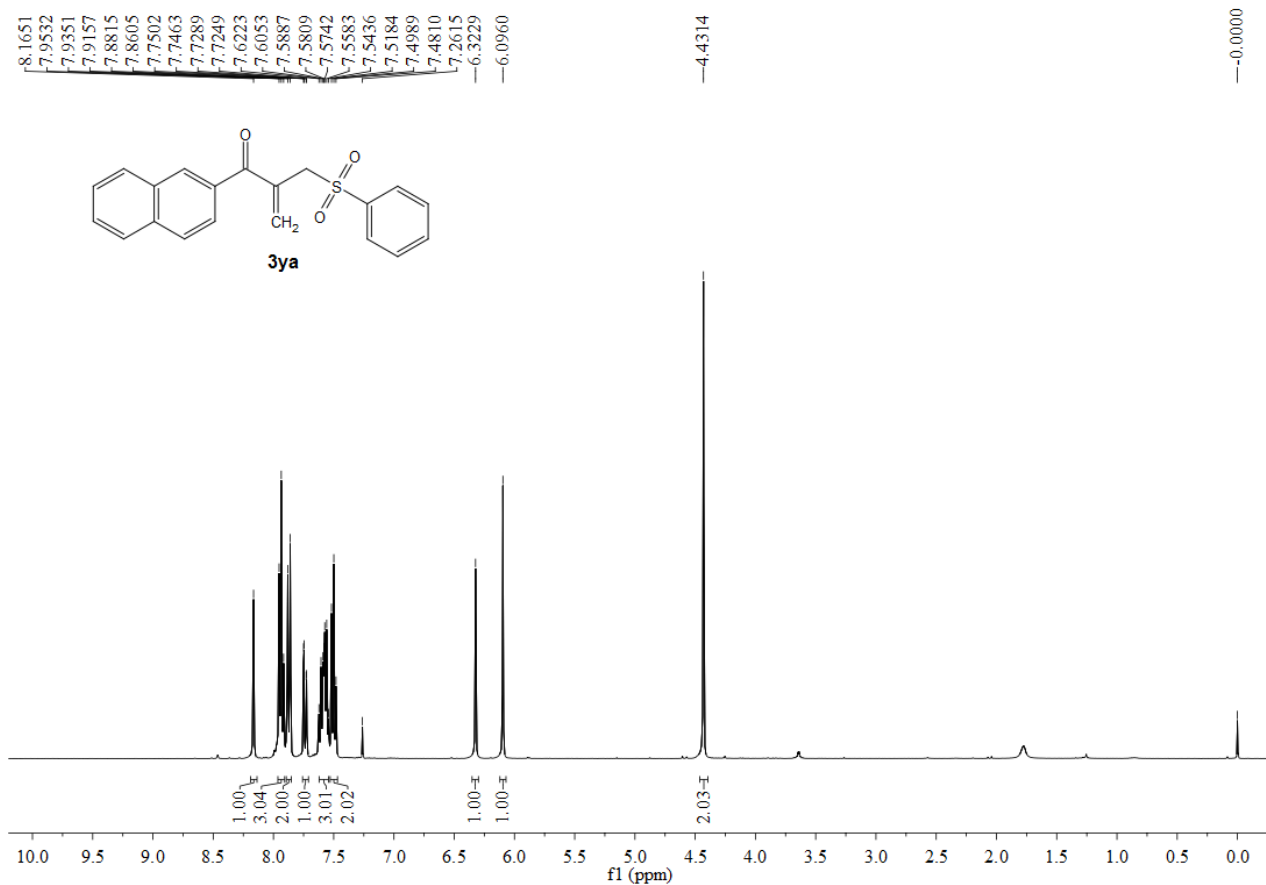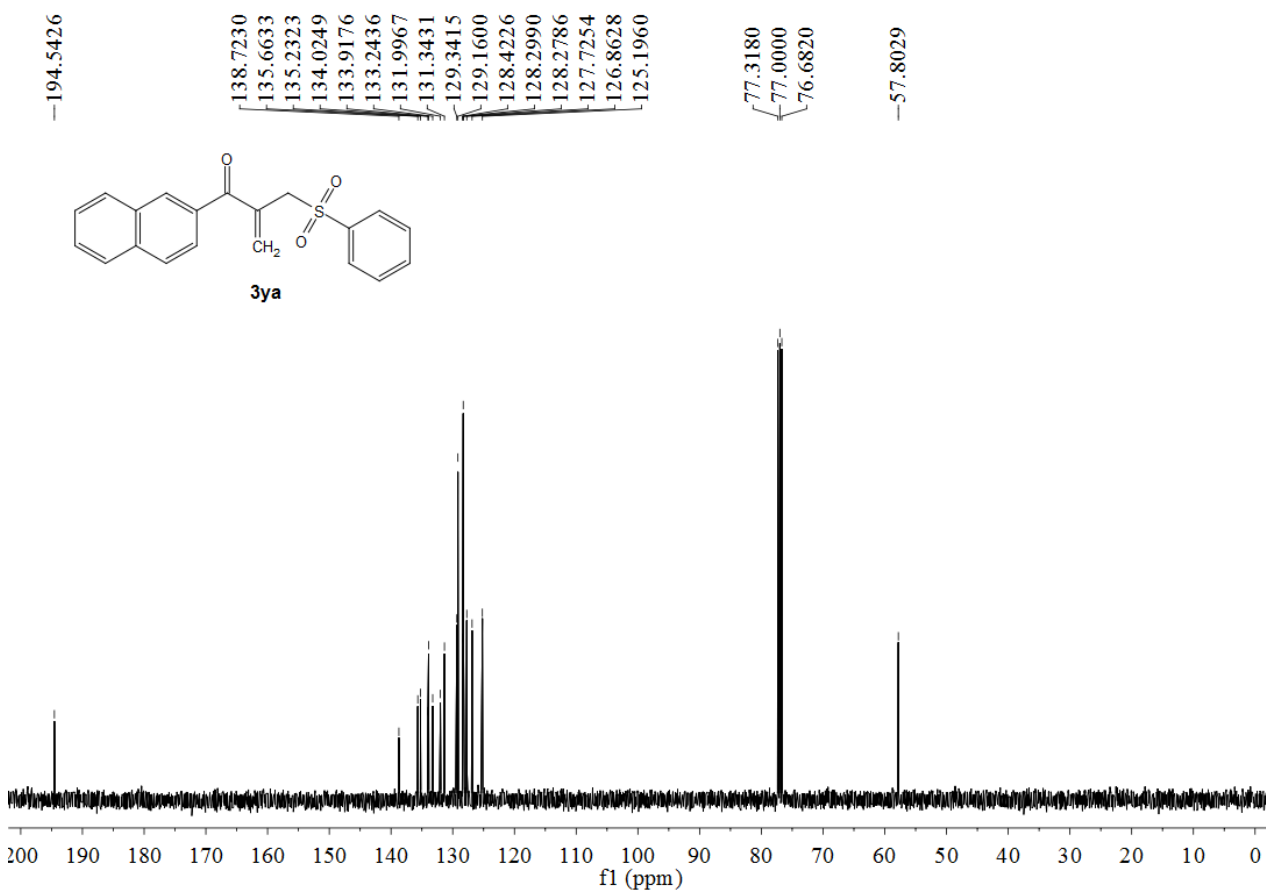

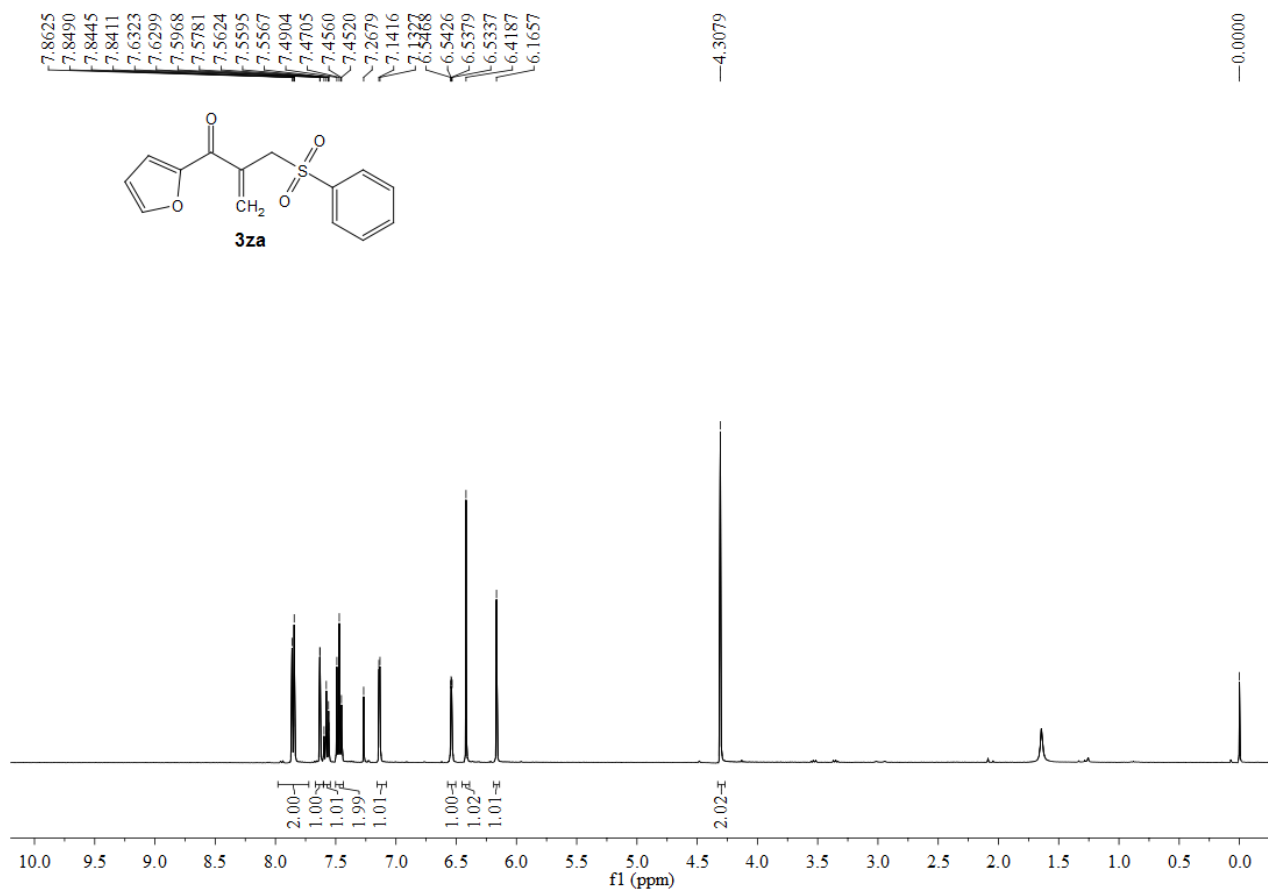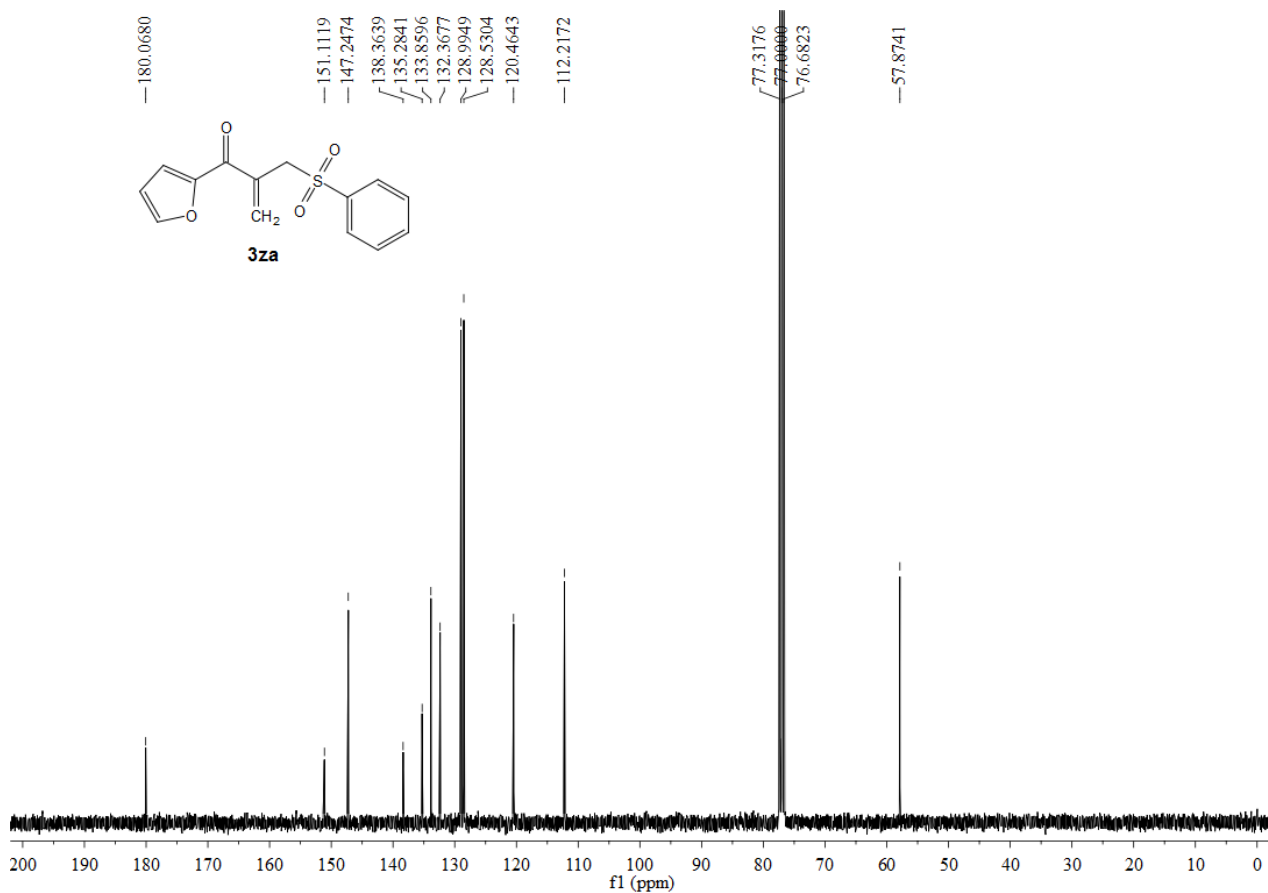

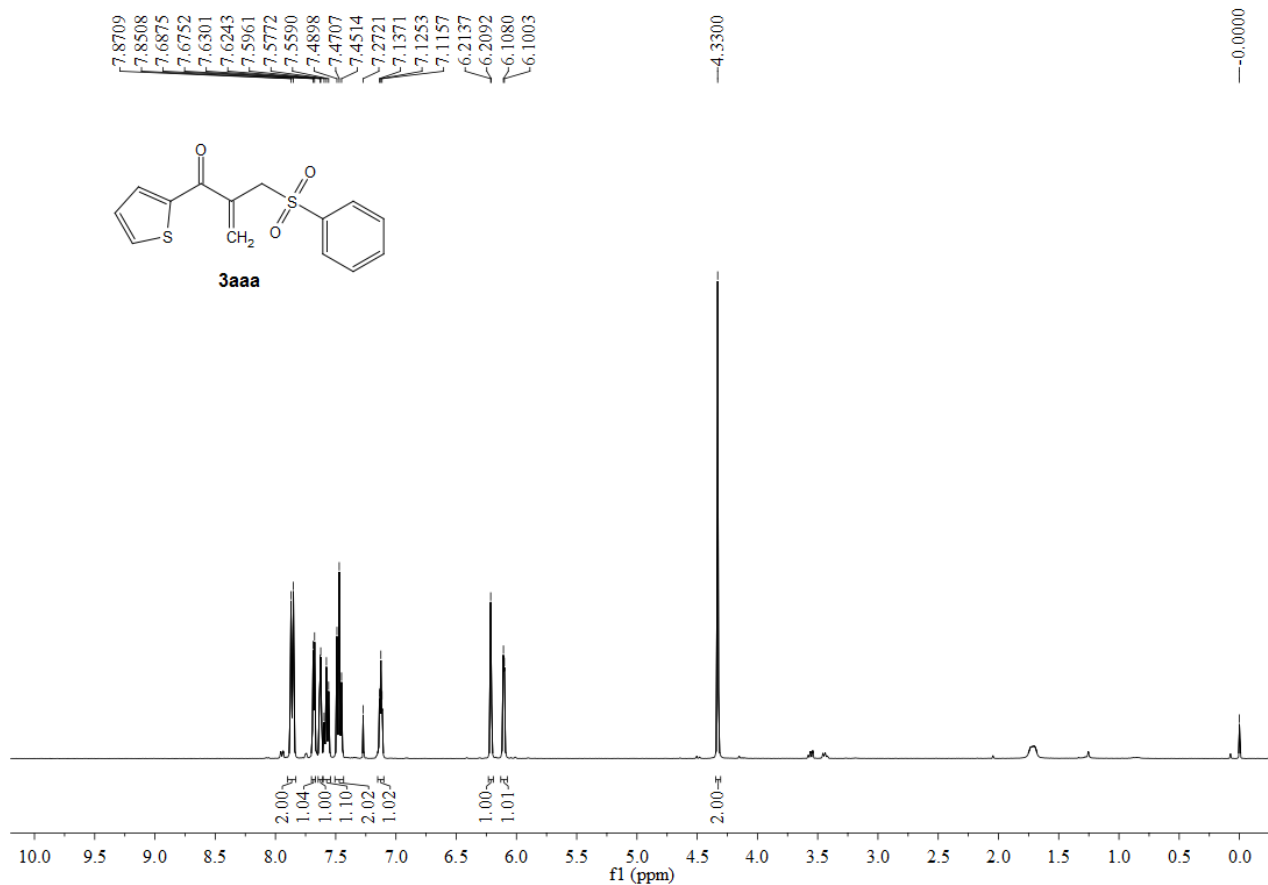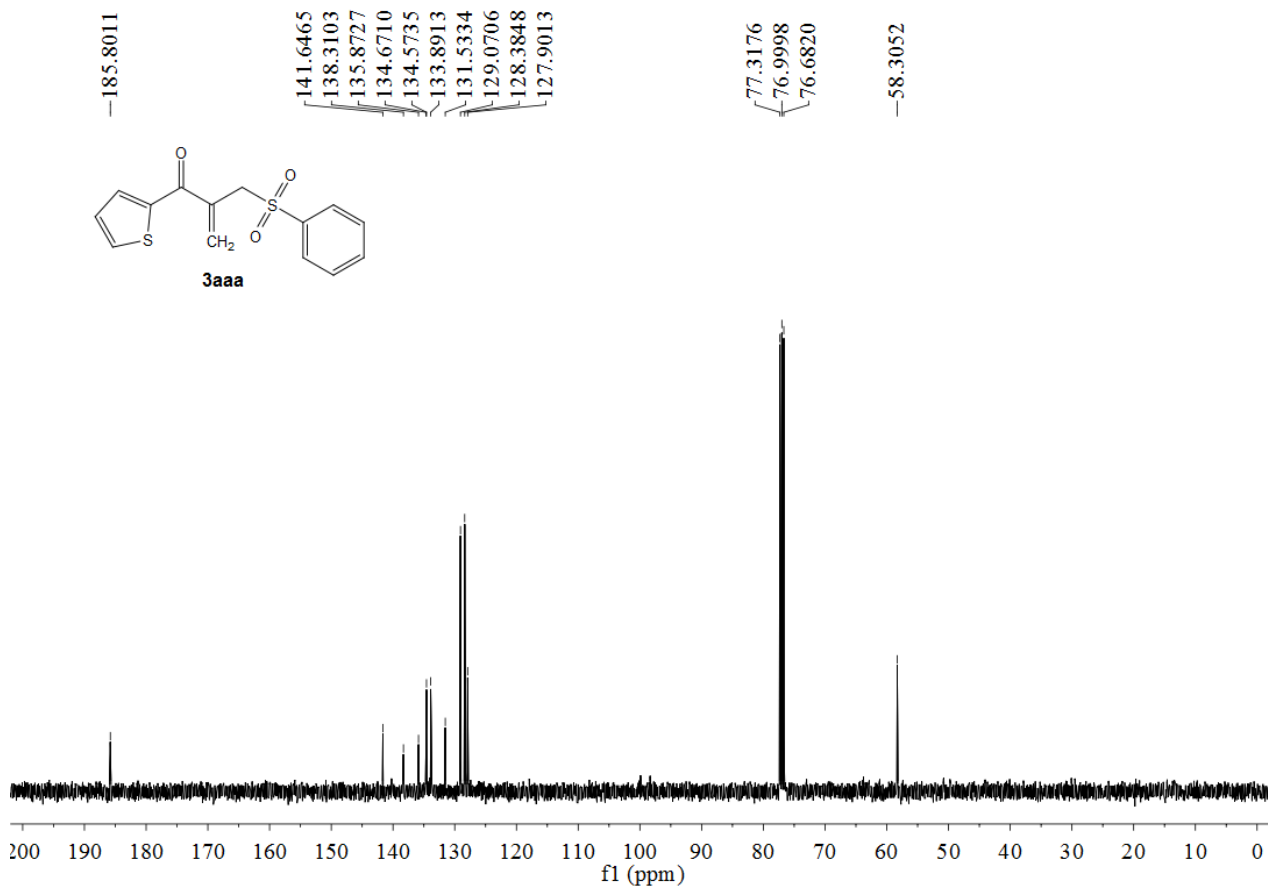

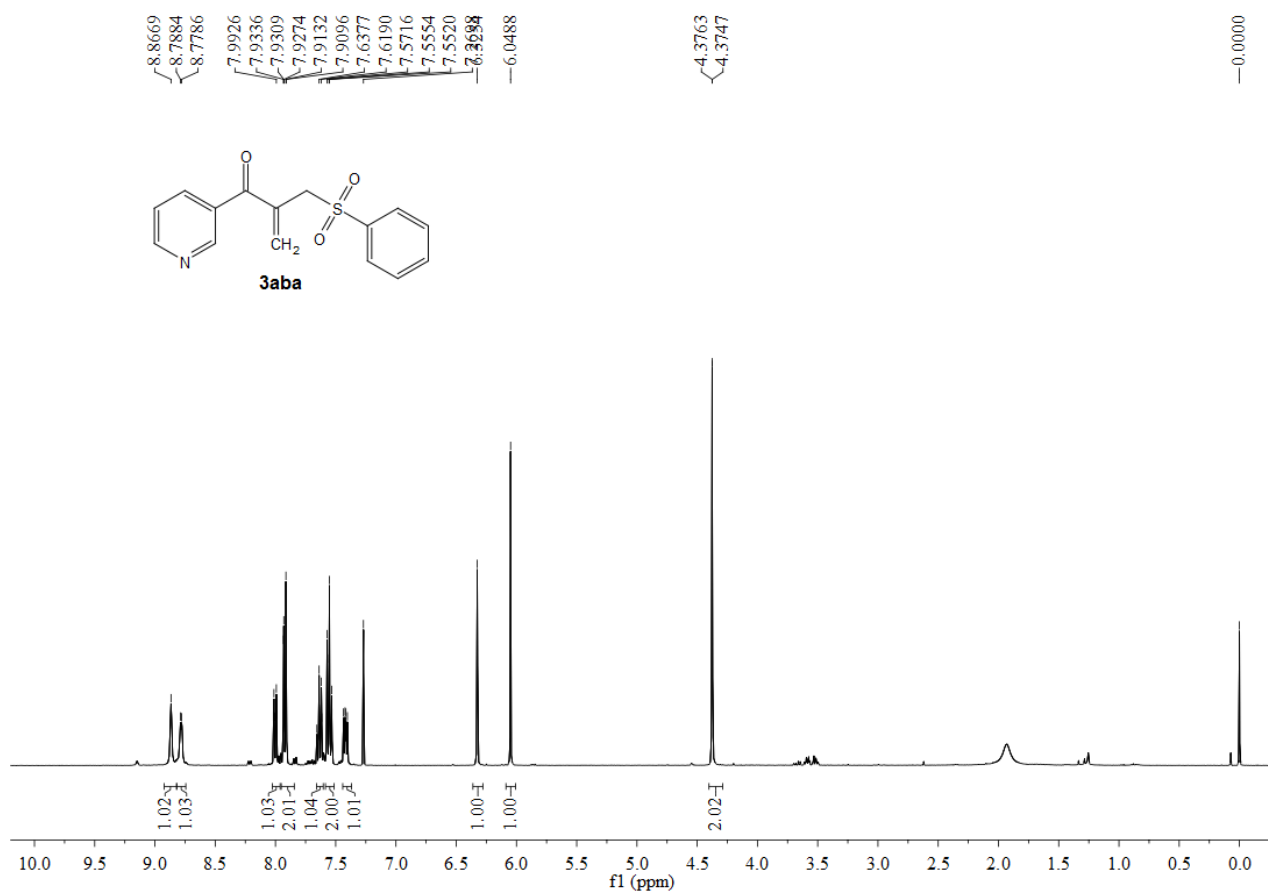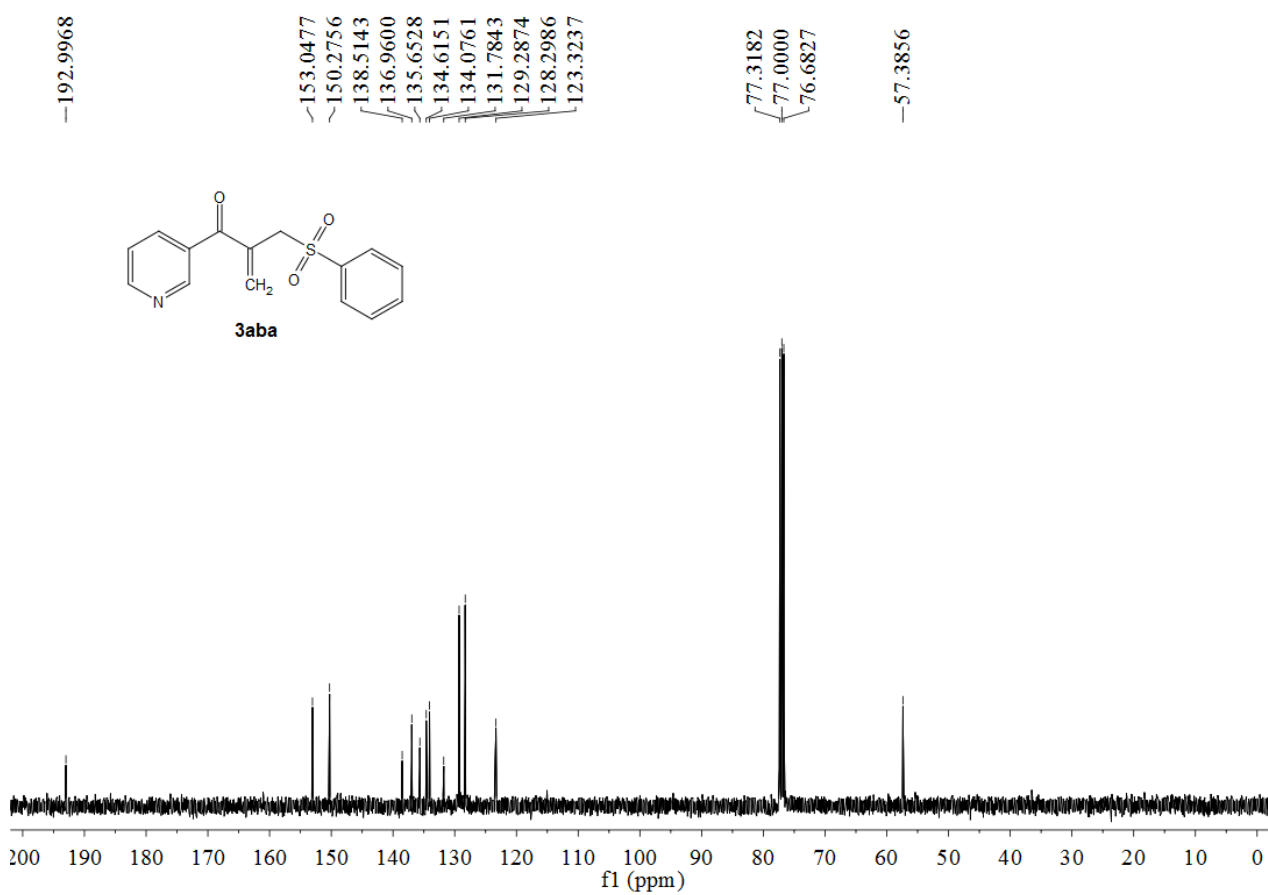

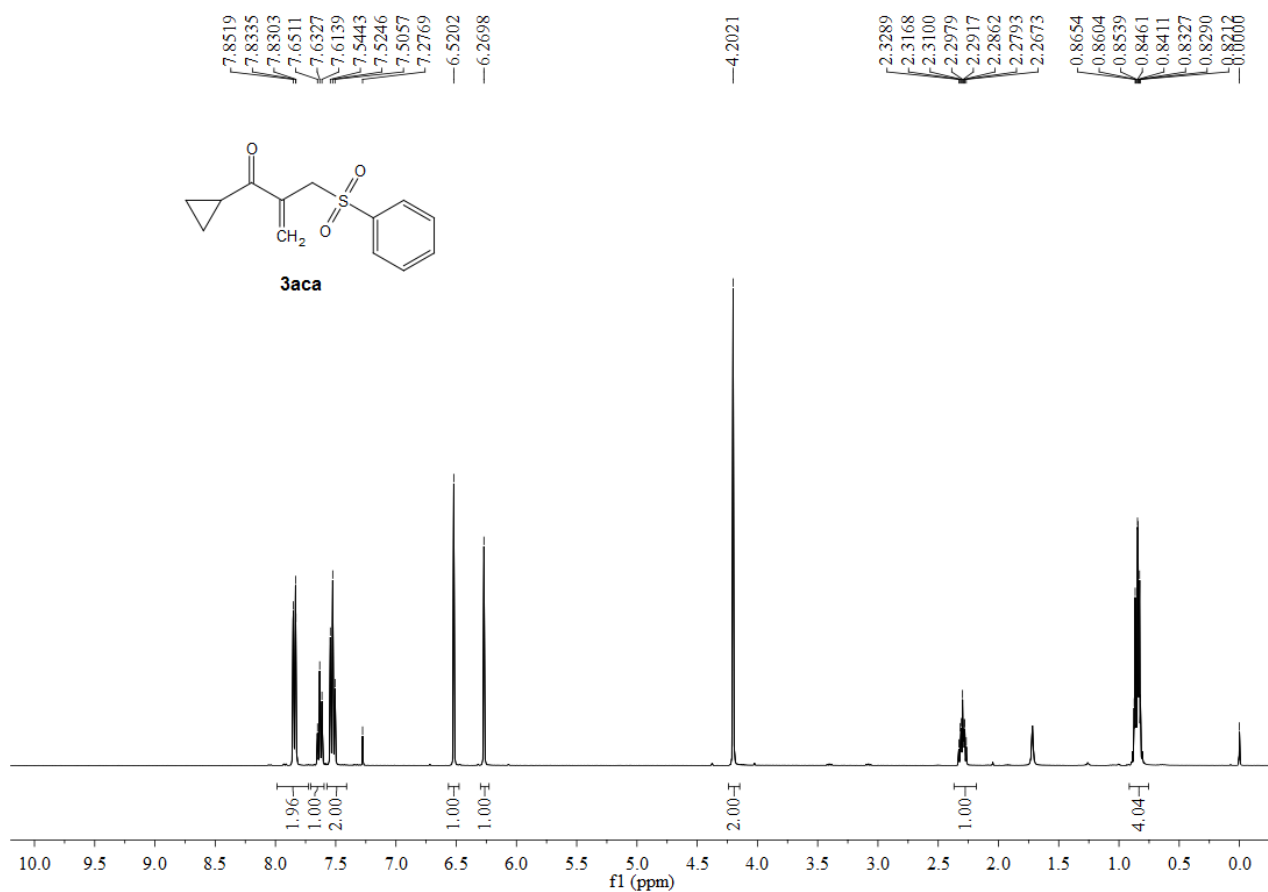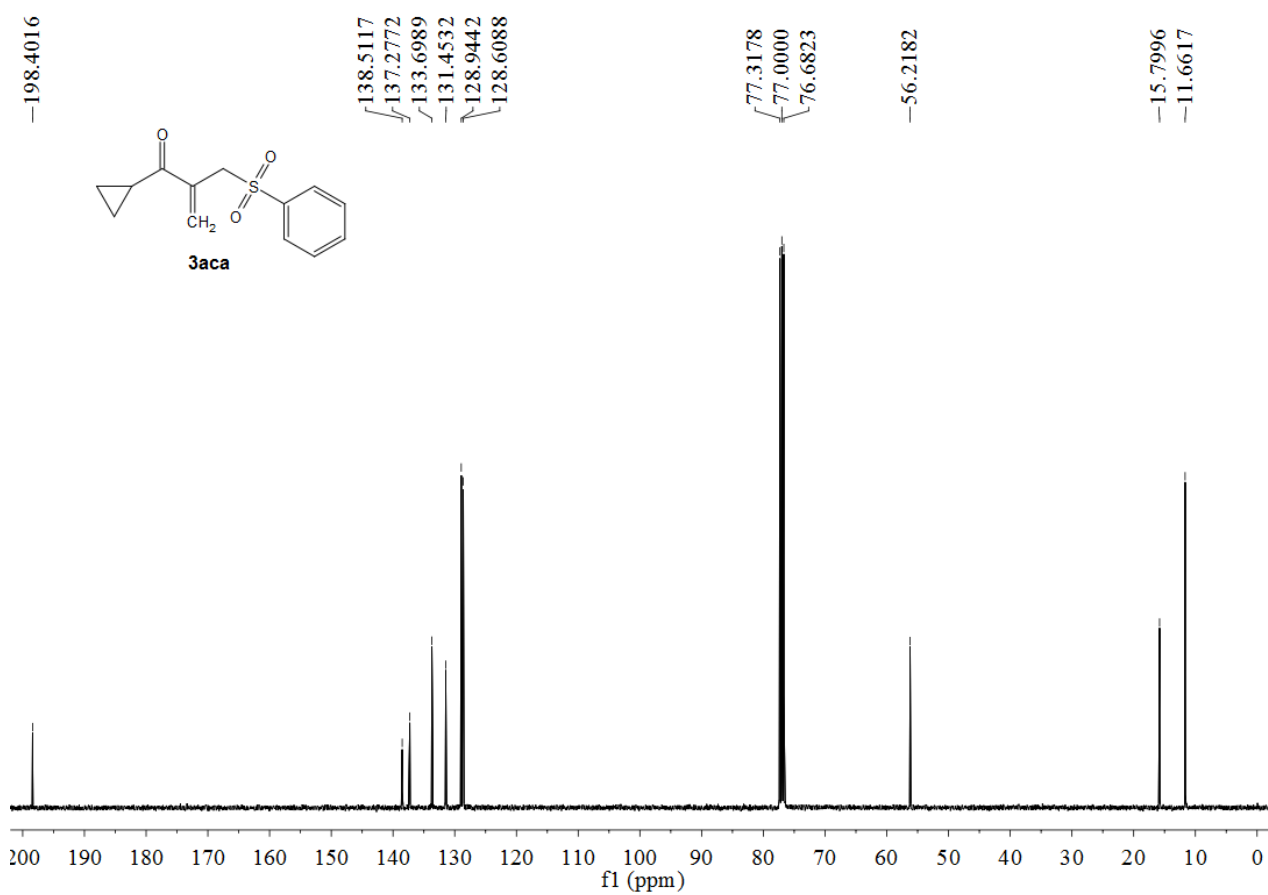



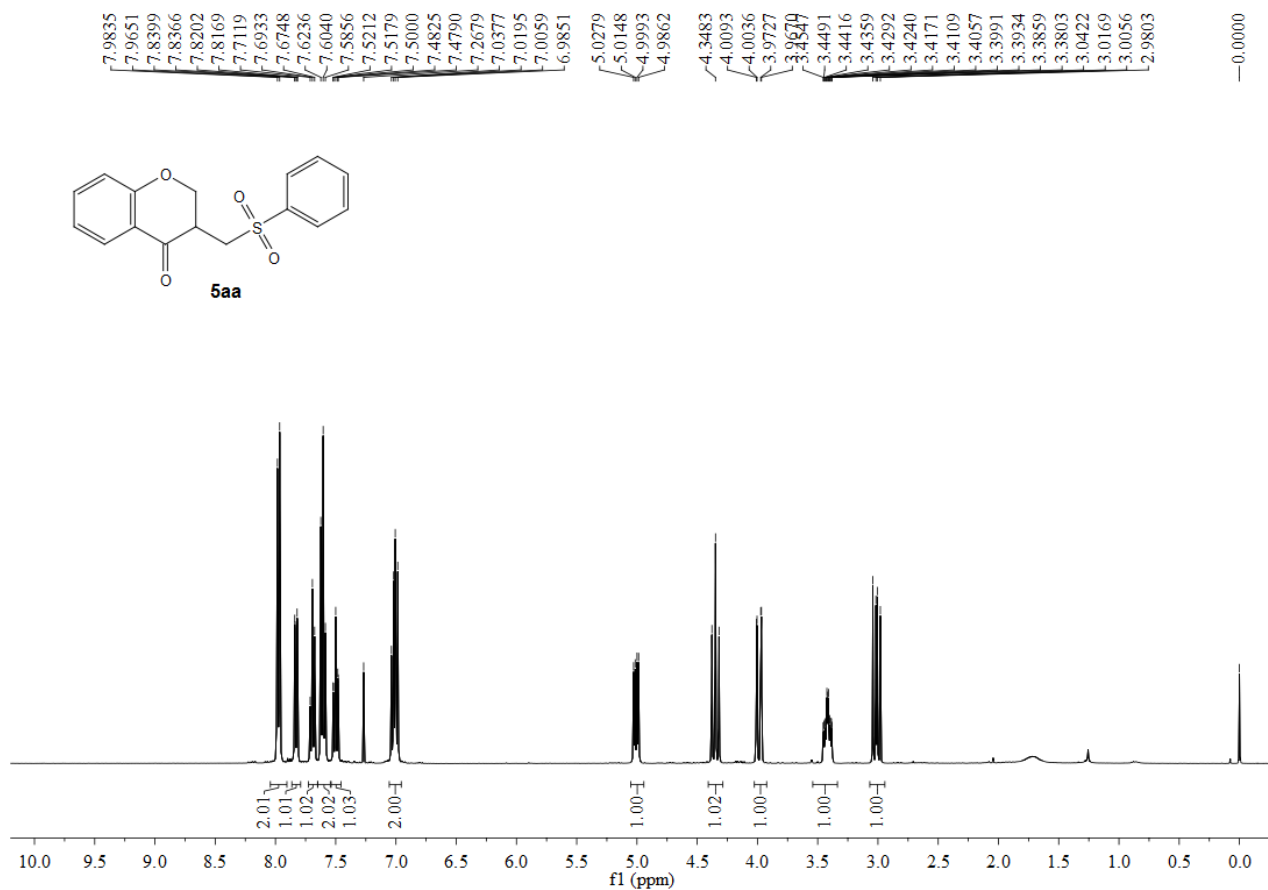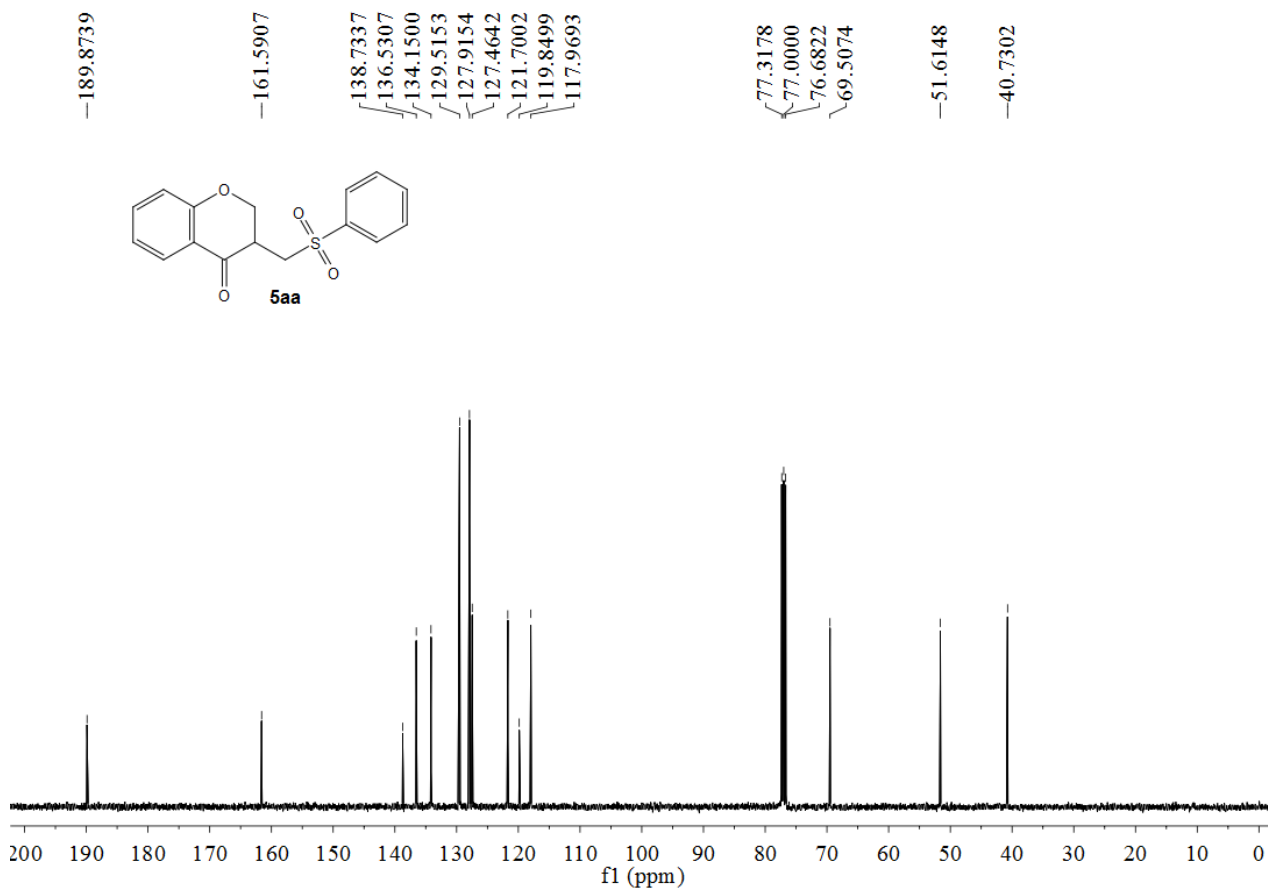

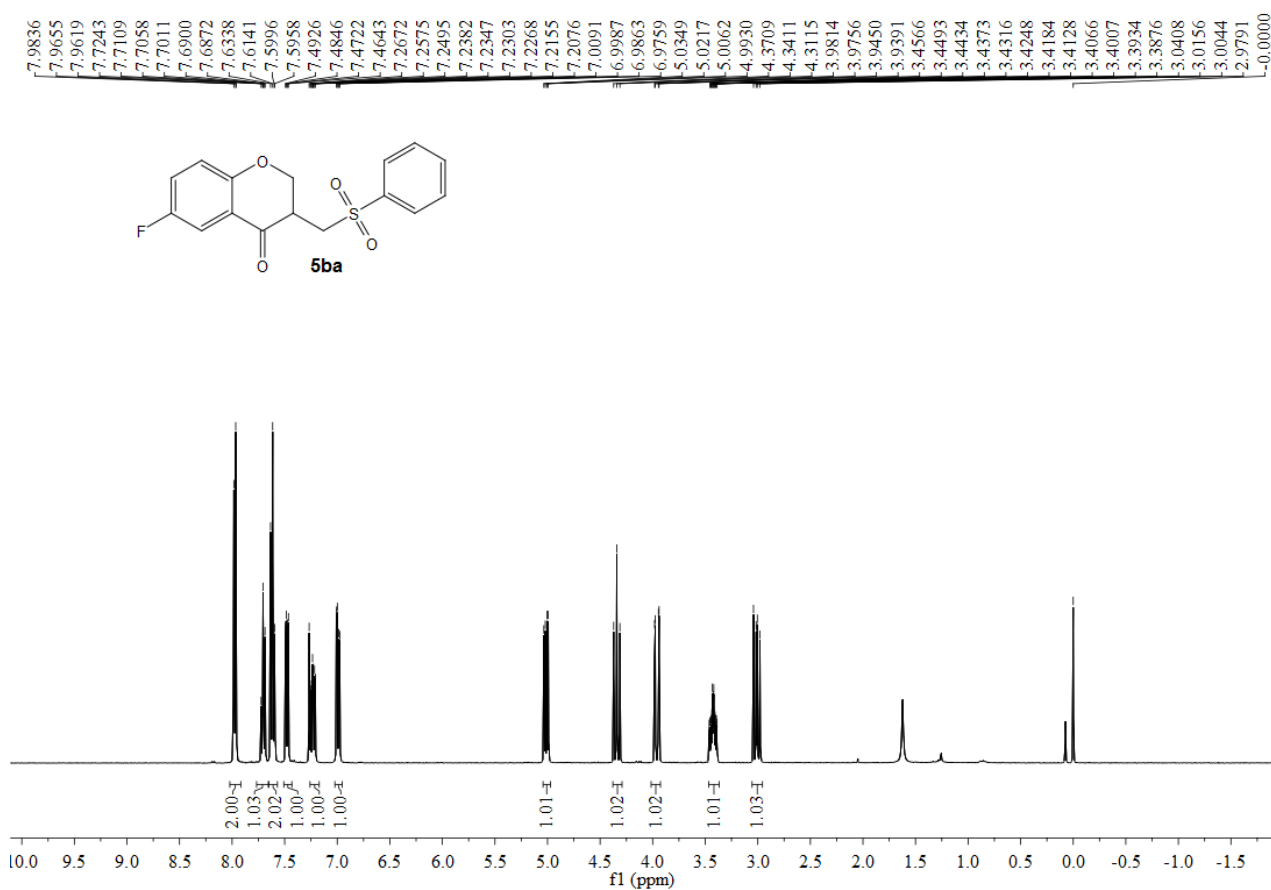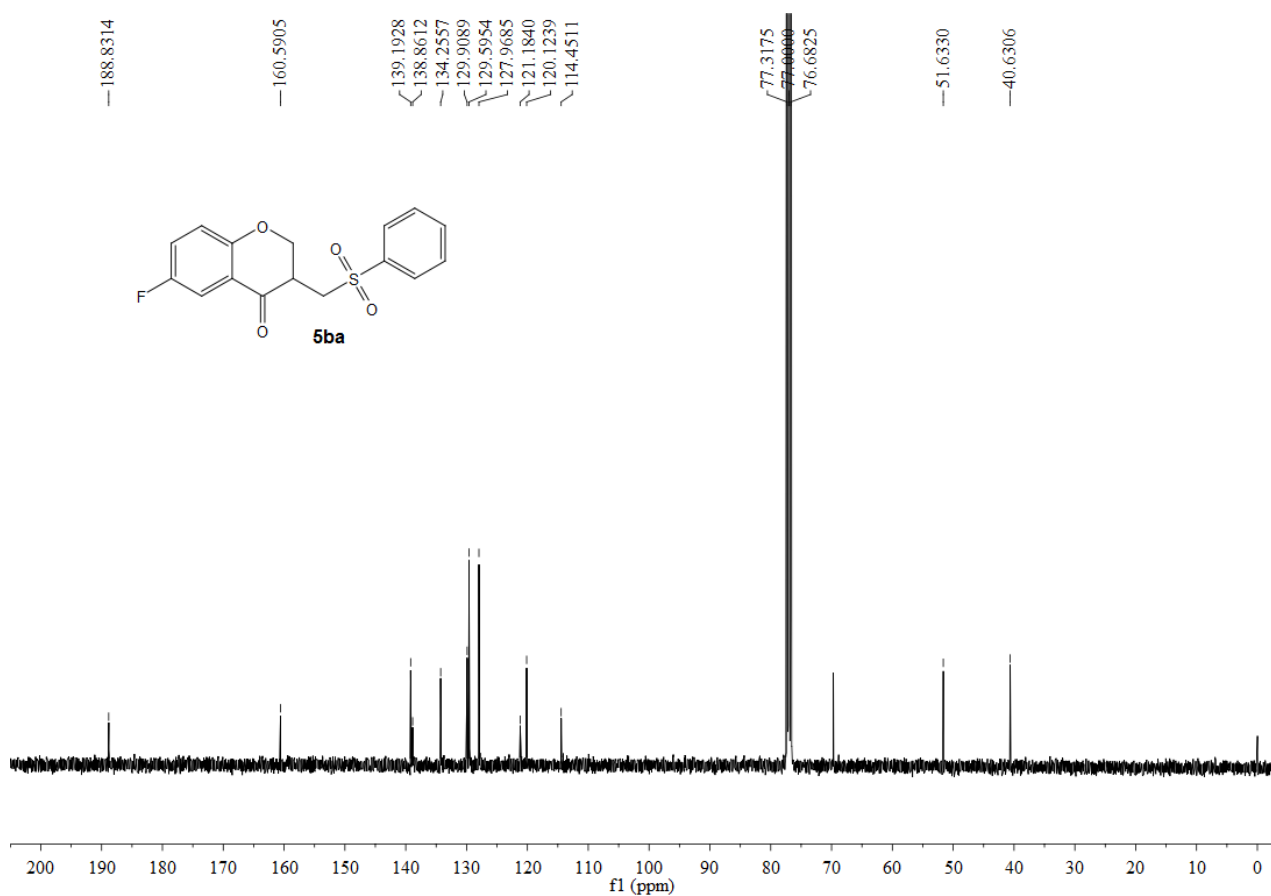

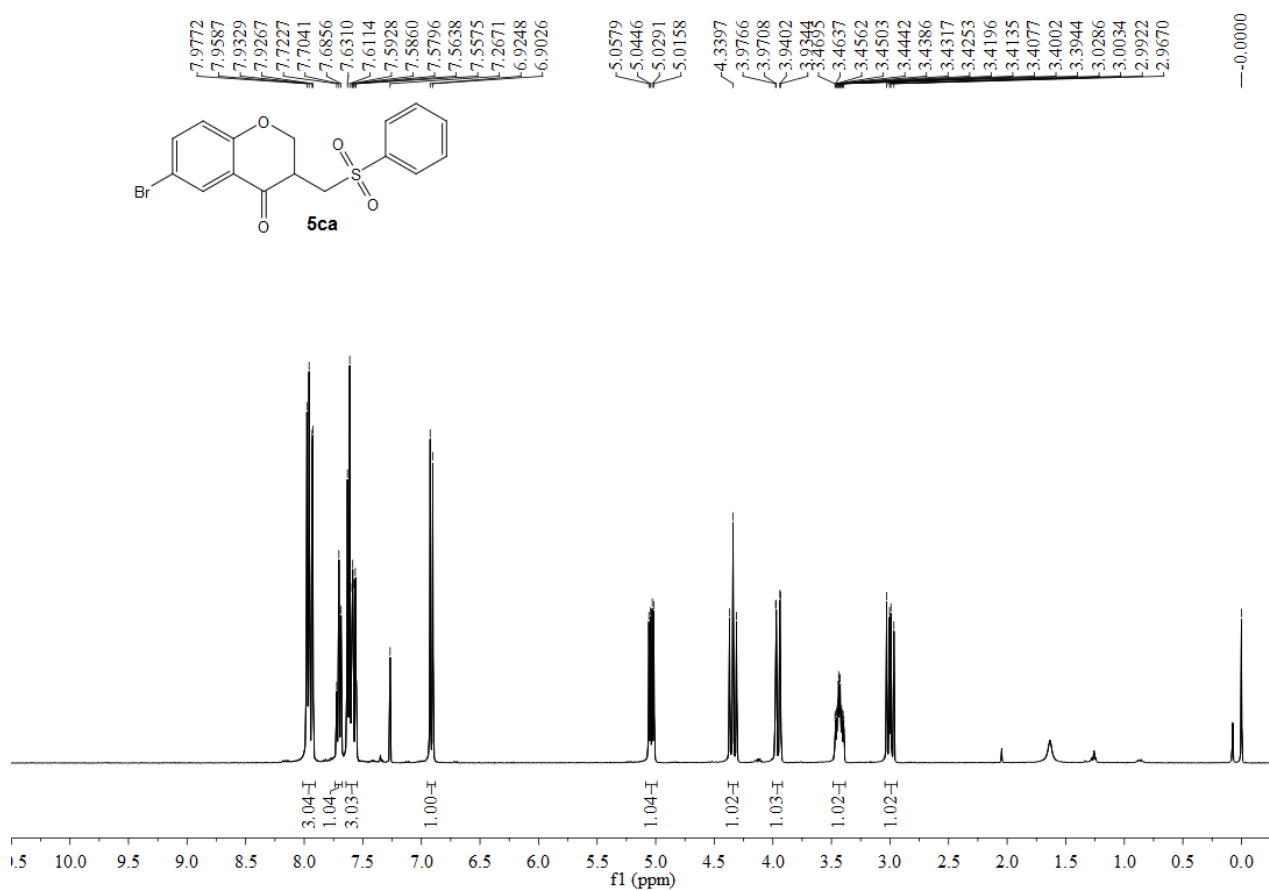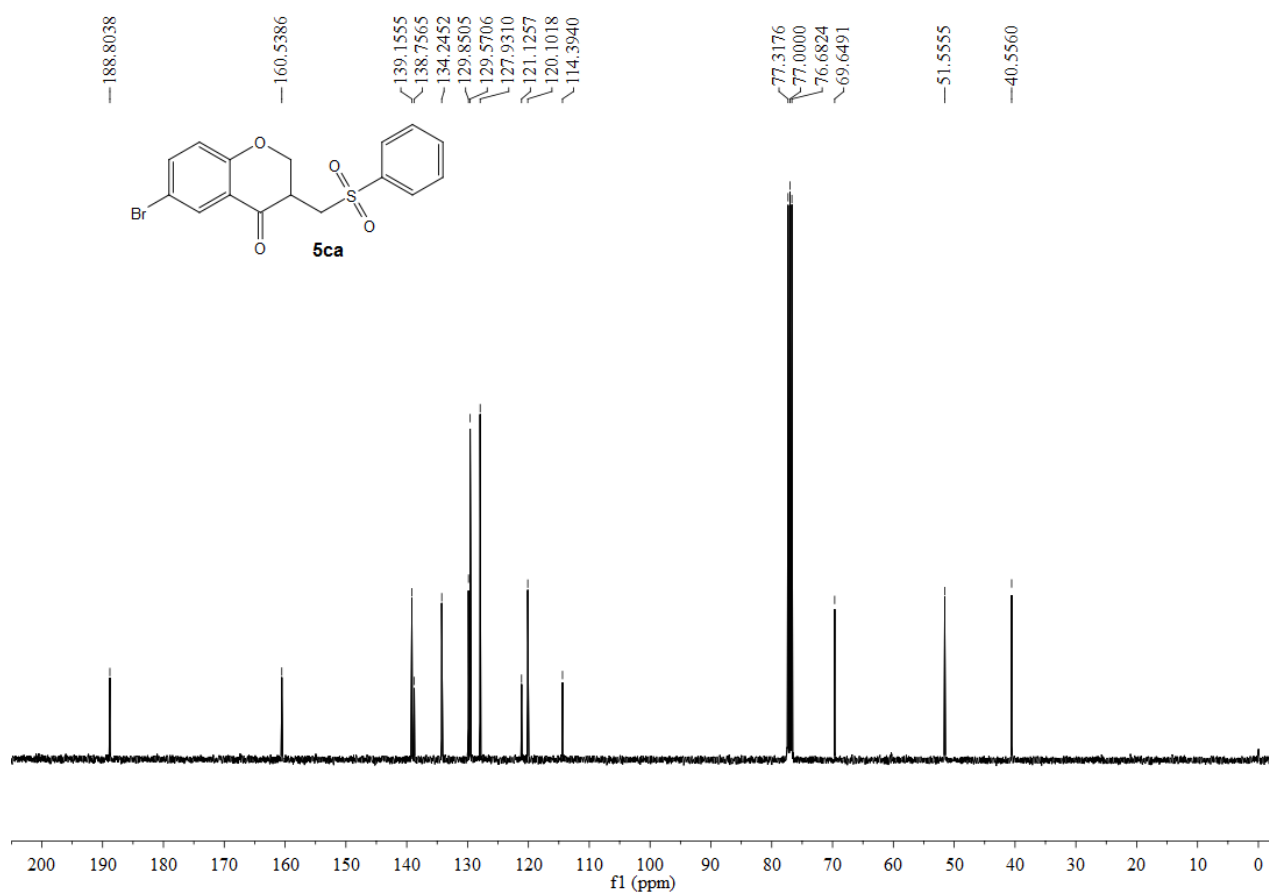

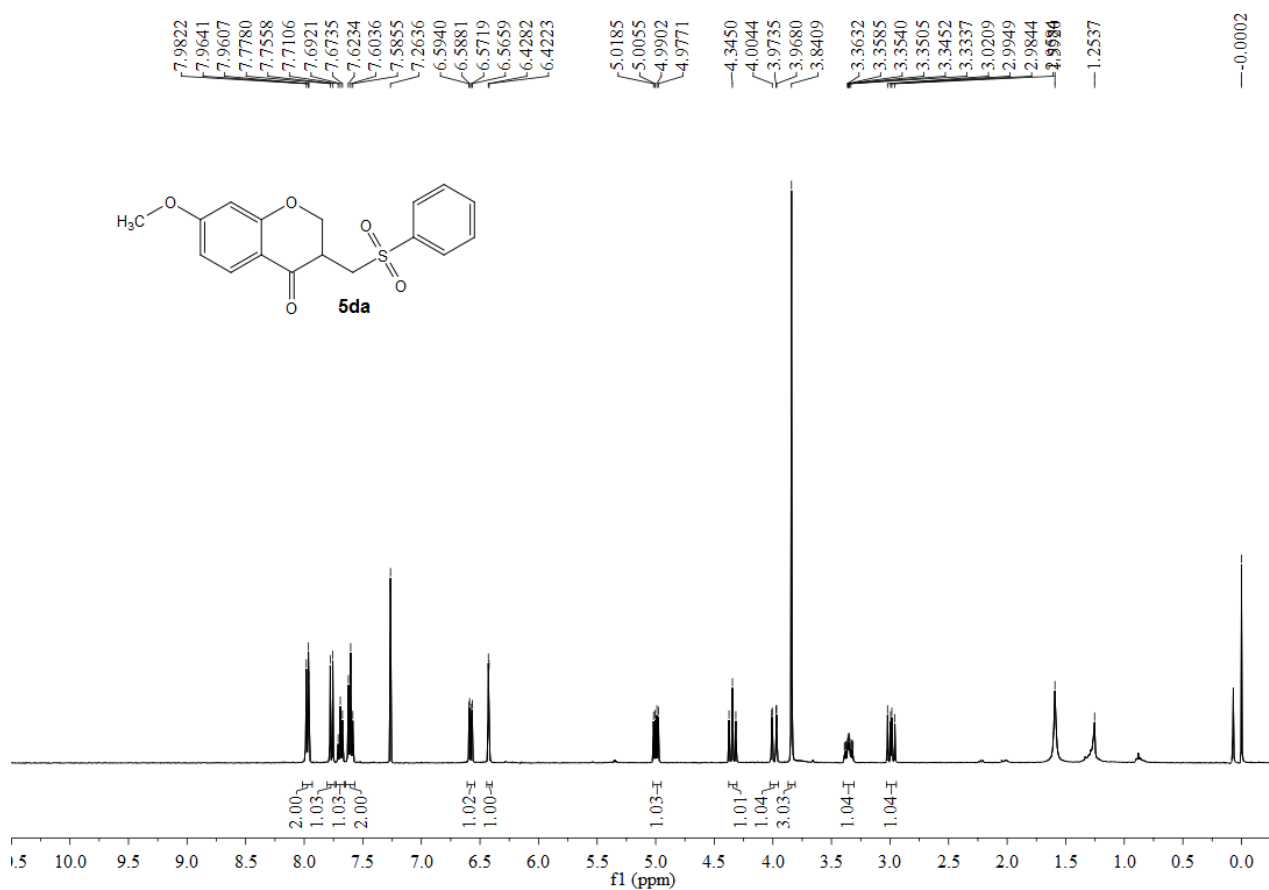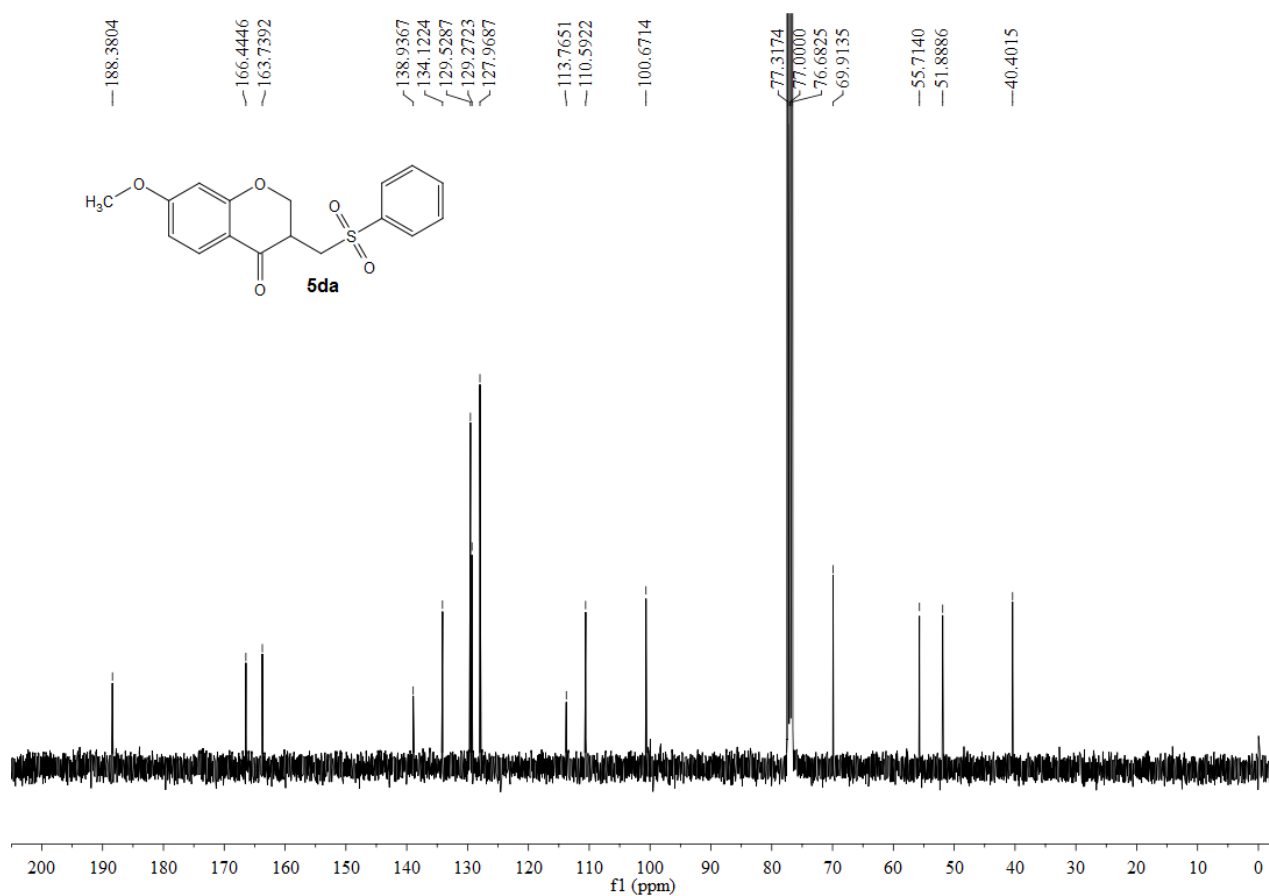

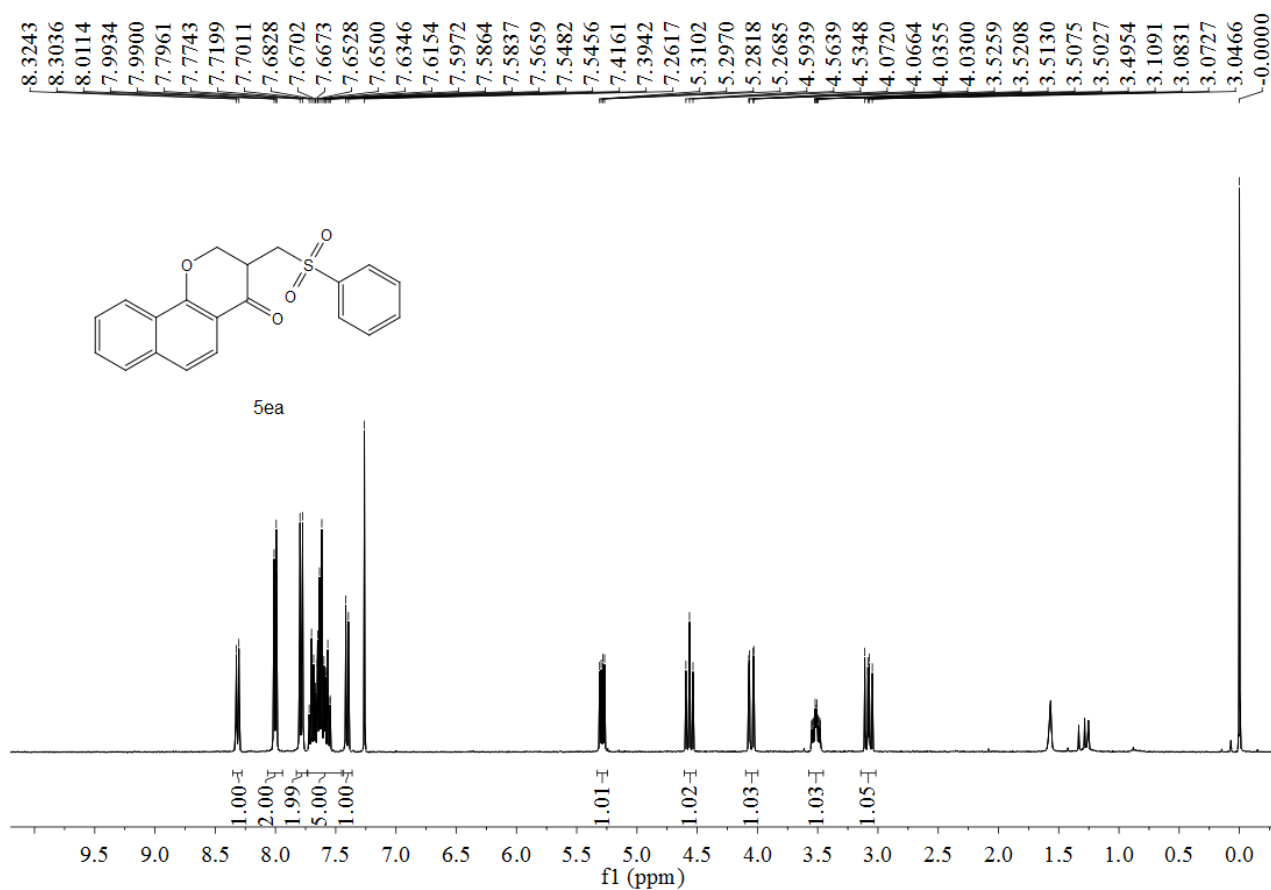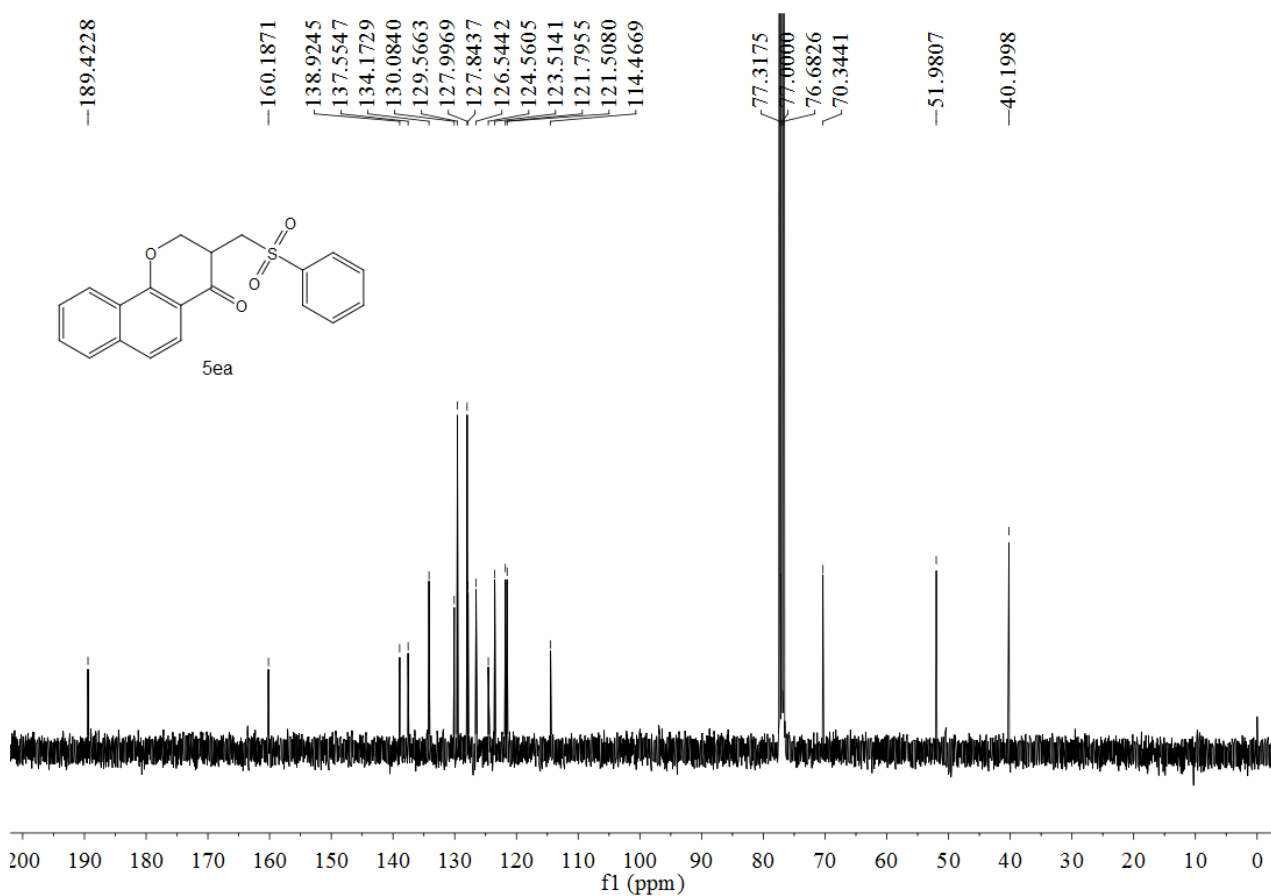

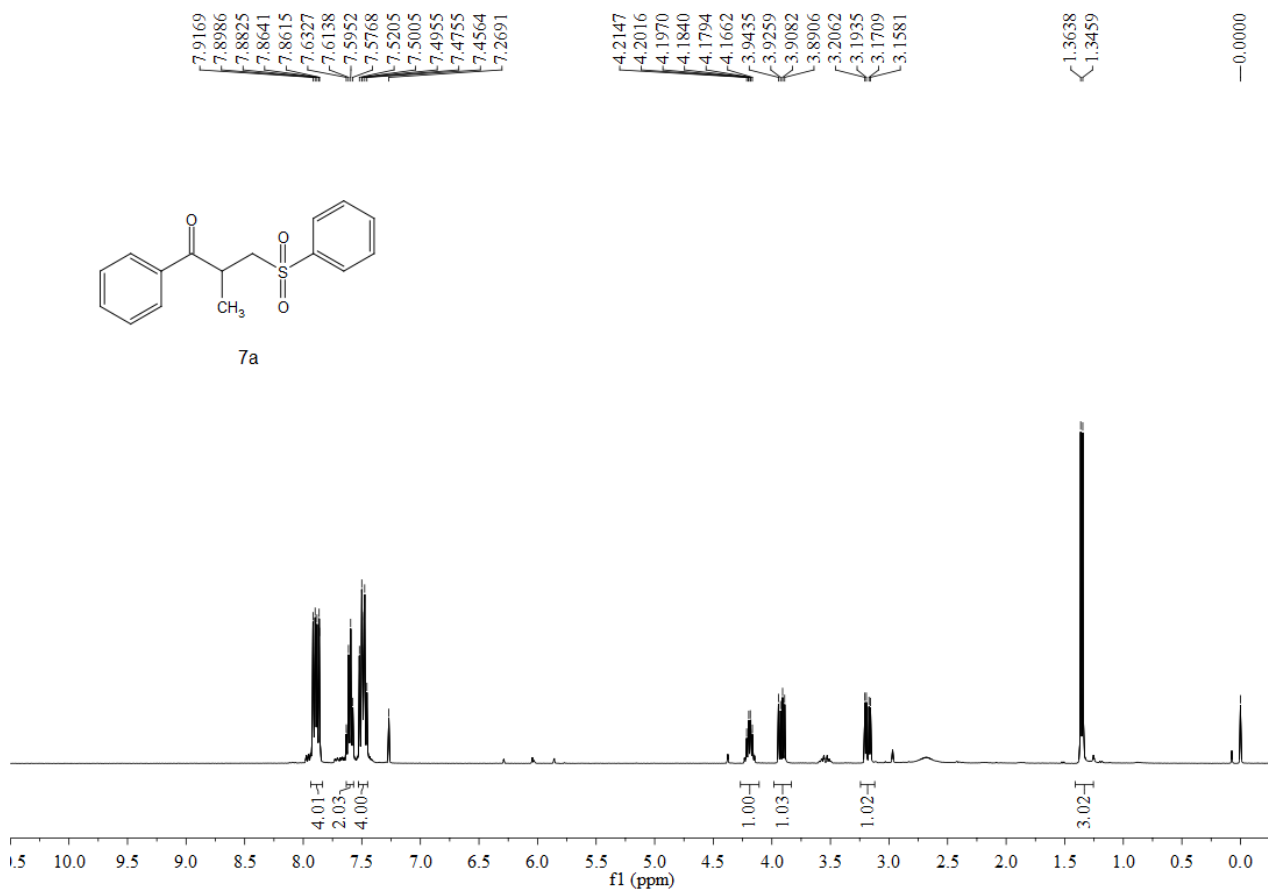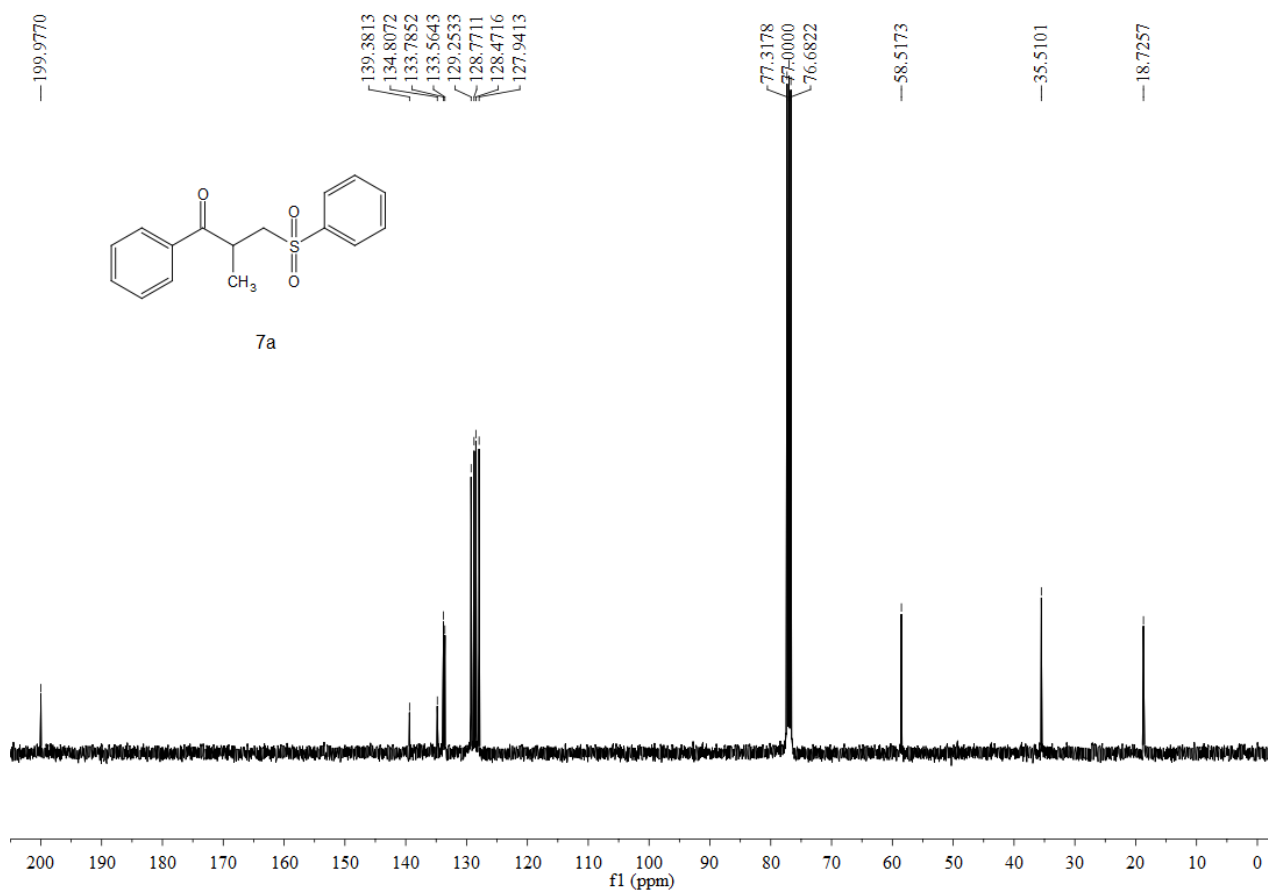

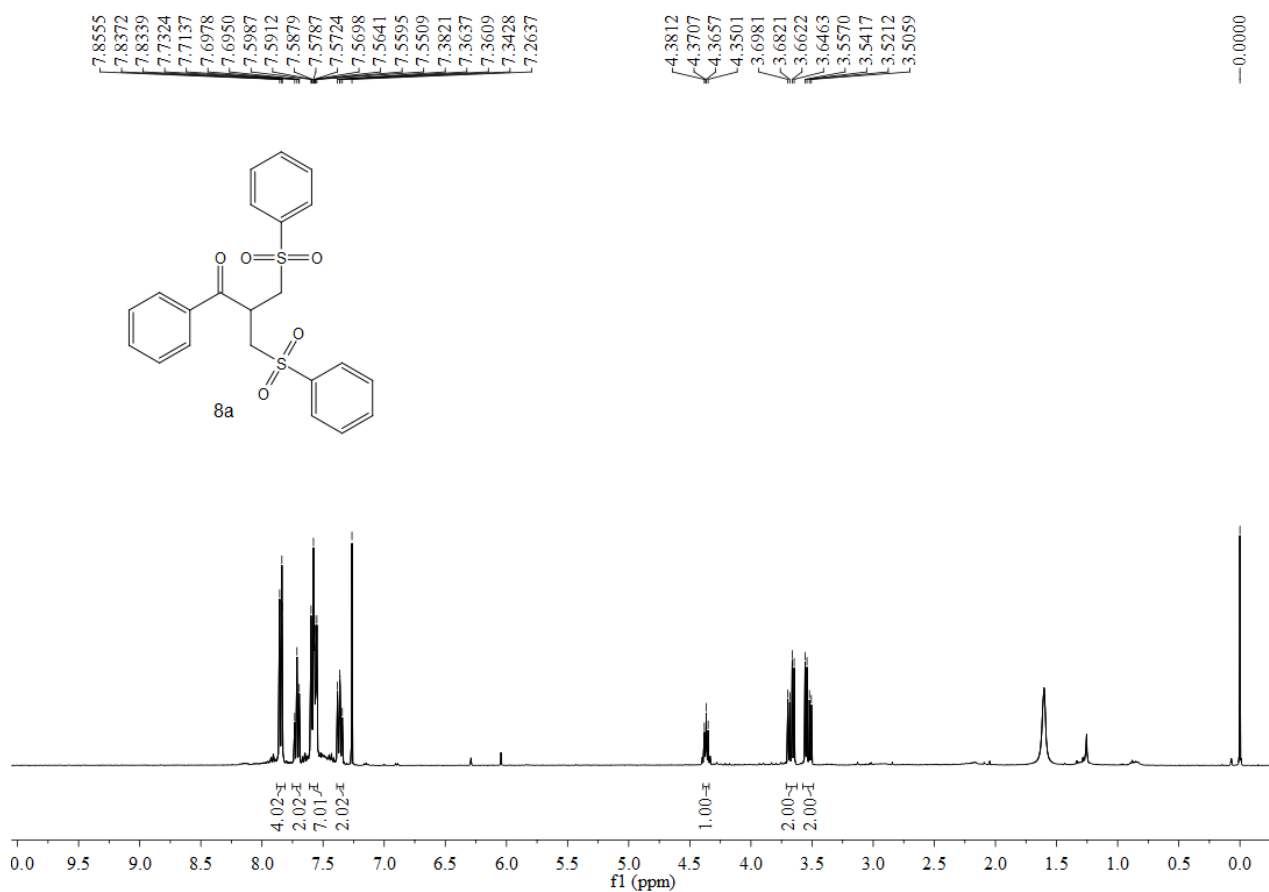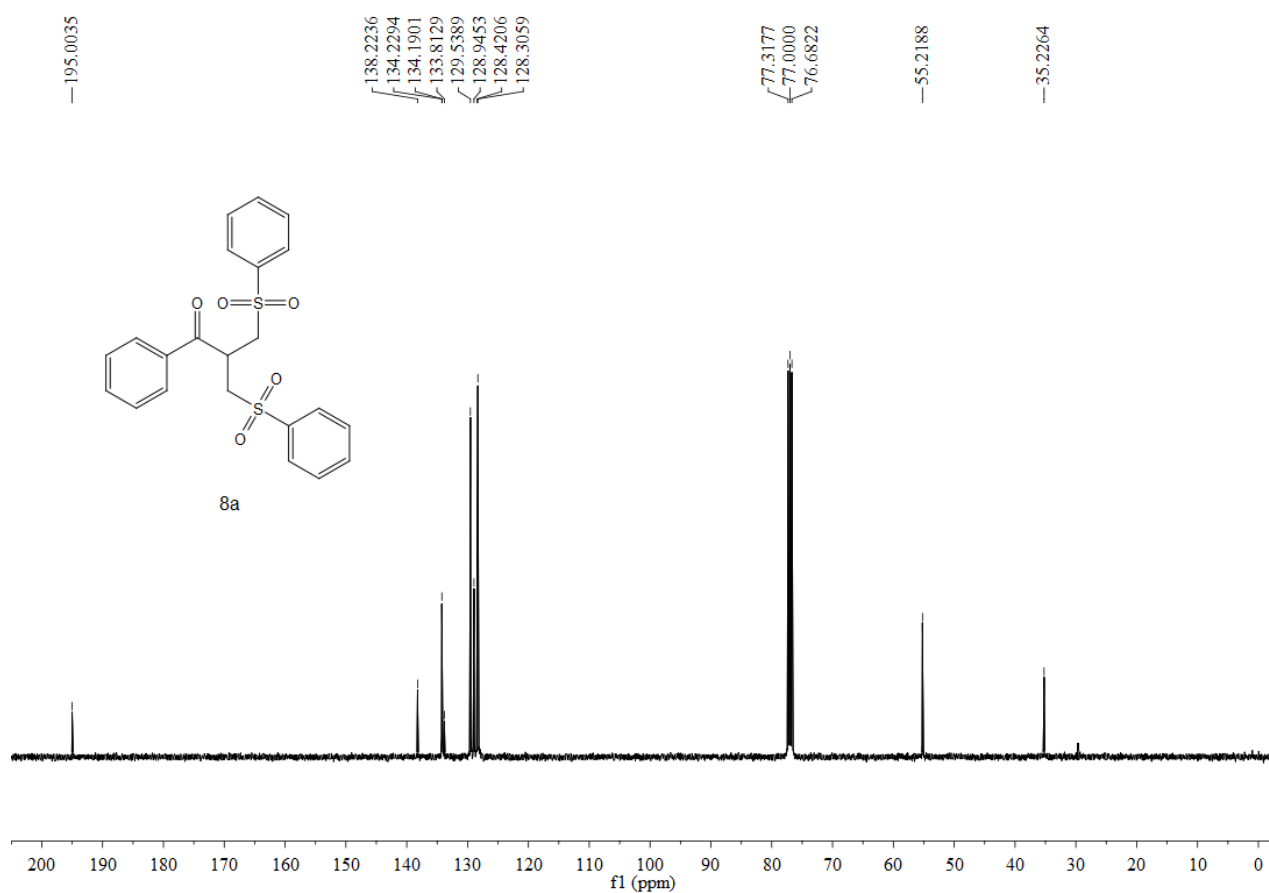

Supplement: c7gc03719h1.pdf [file c7gc03719h1.pdf]
